# Supplementary material for: Development of 2-oindolin-3-ylidene-indole-3-carbohydrazide derivatives as novel apoptotic and anti-proliferative agents towards colorectal cancer cells
Source: PubMed Central journal article supplement (PMC7751403; doi:10.1080/14756366.2020.1862100), 2020-12-20

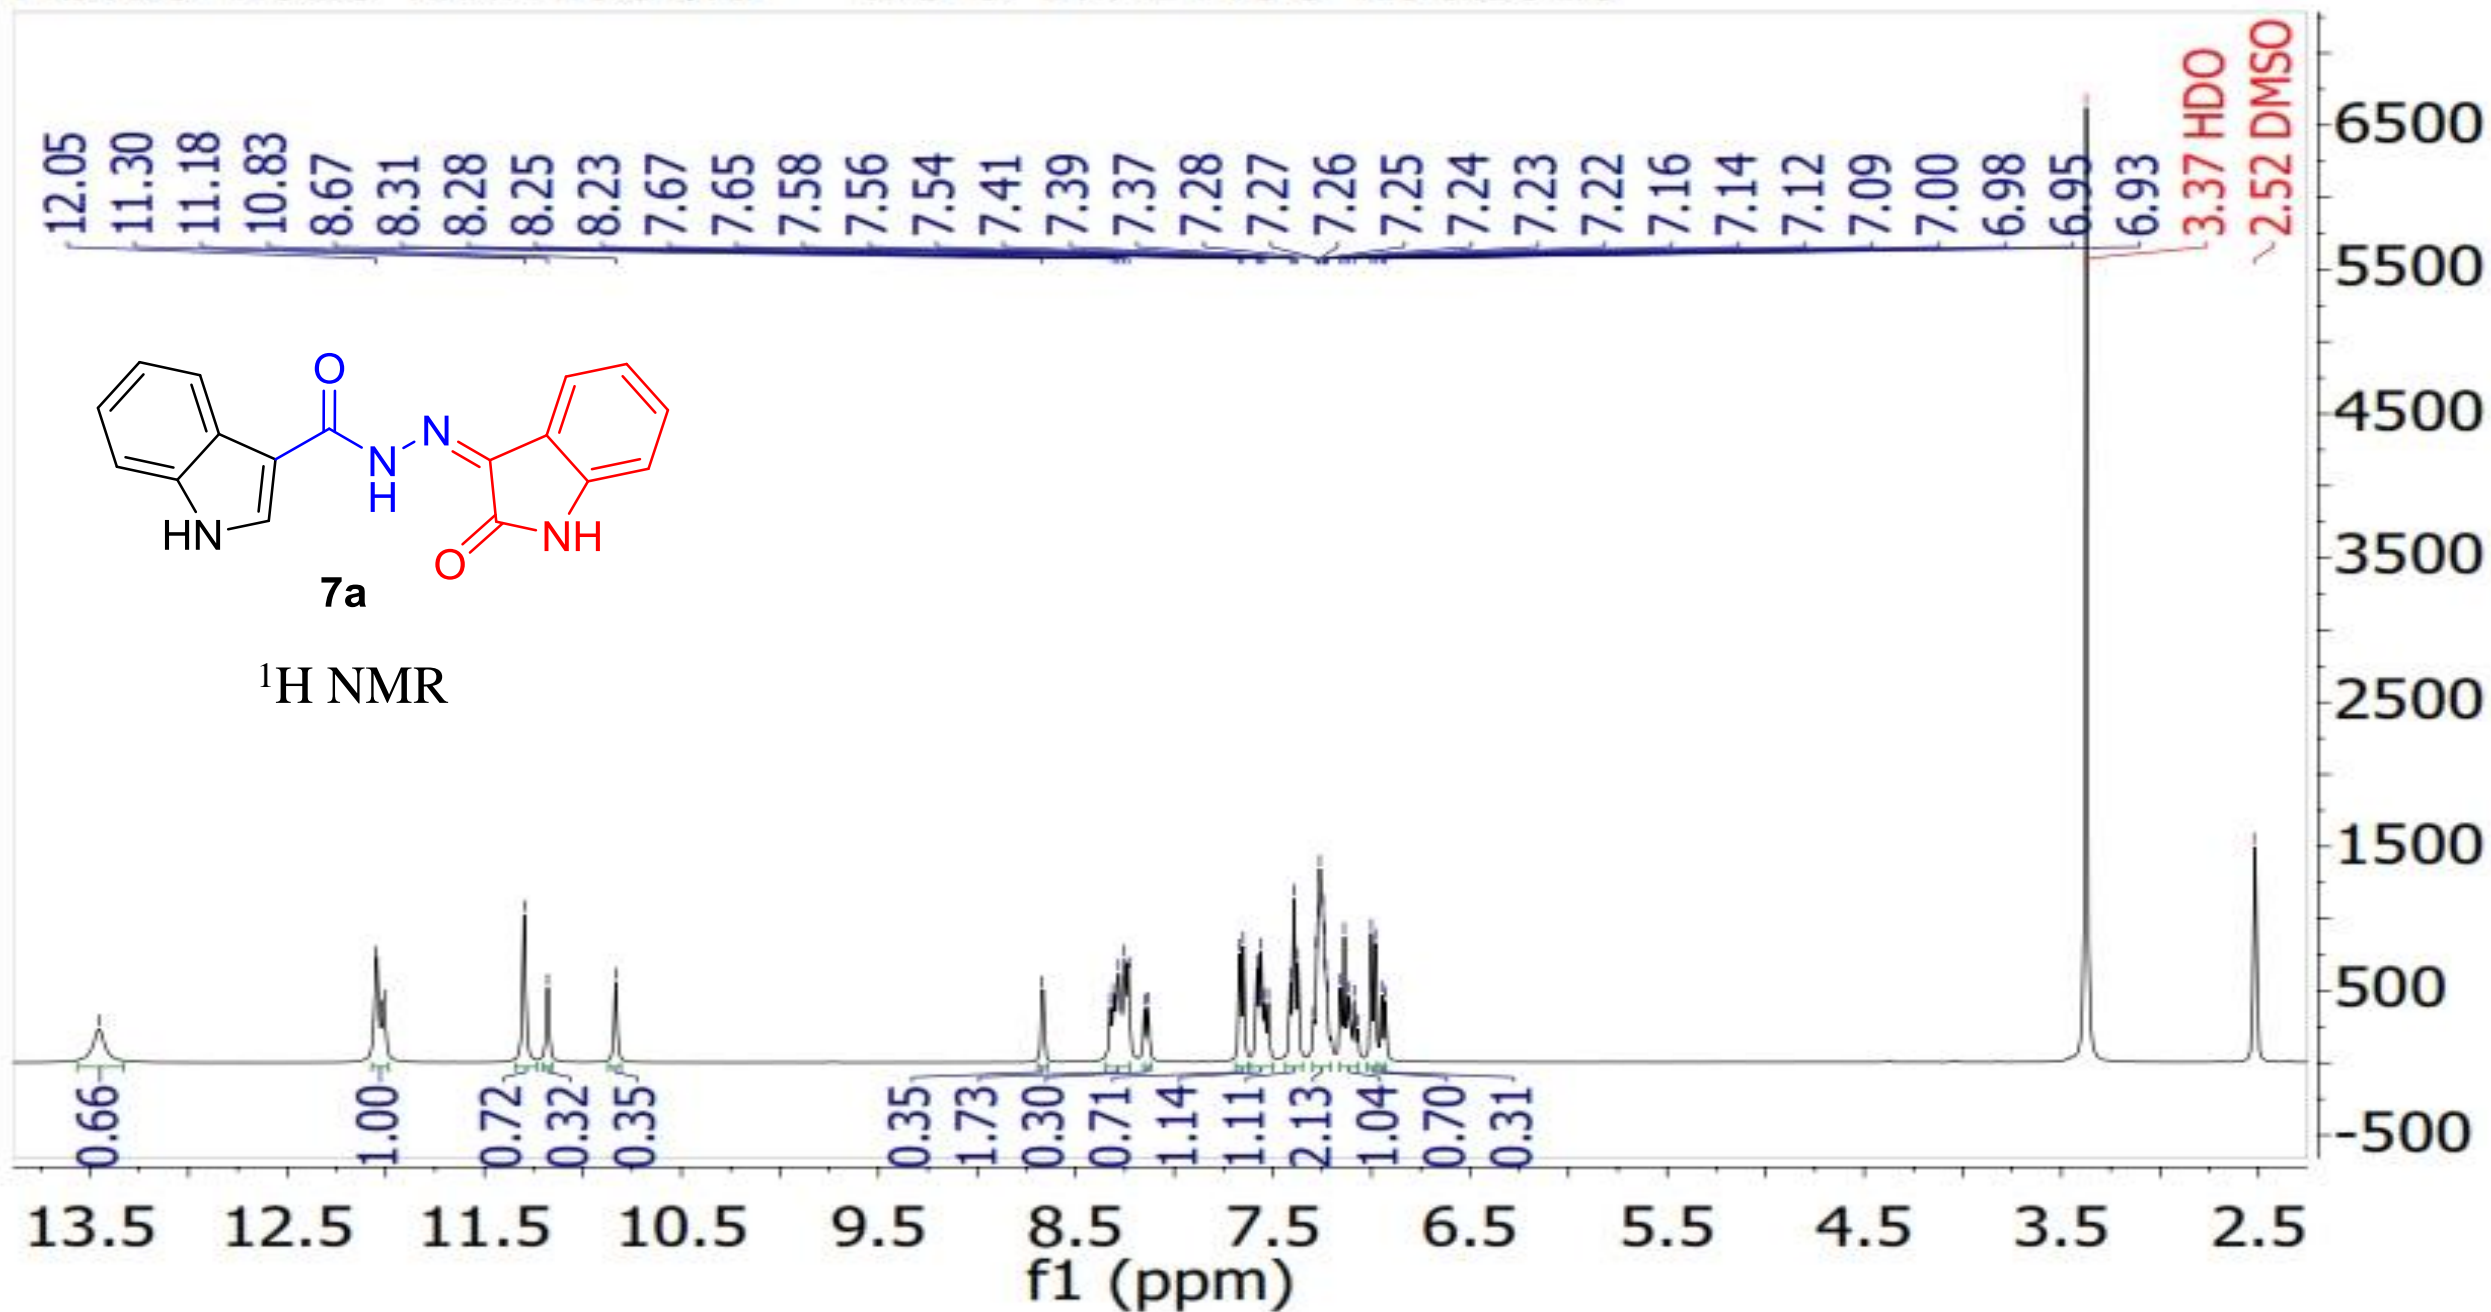

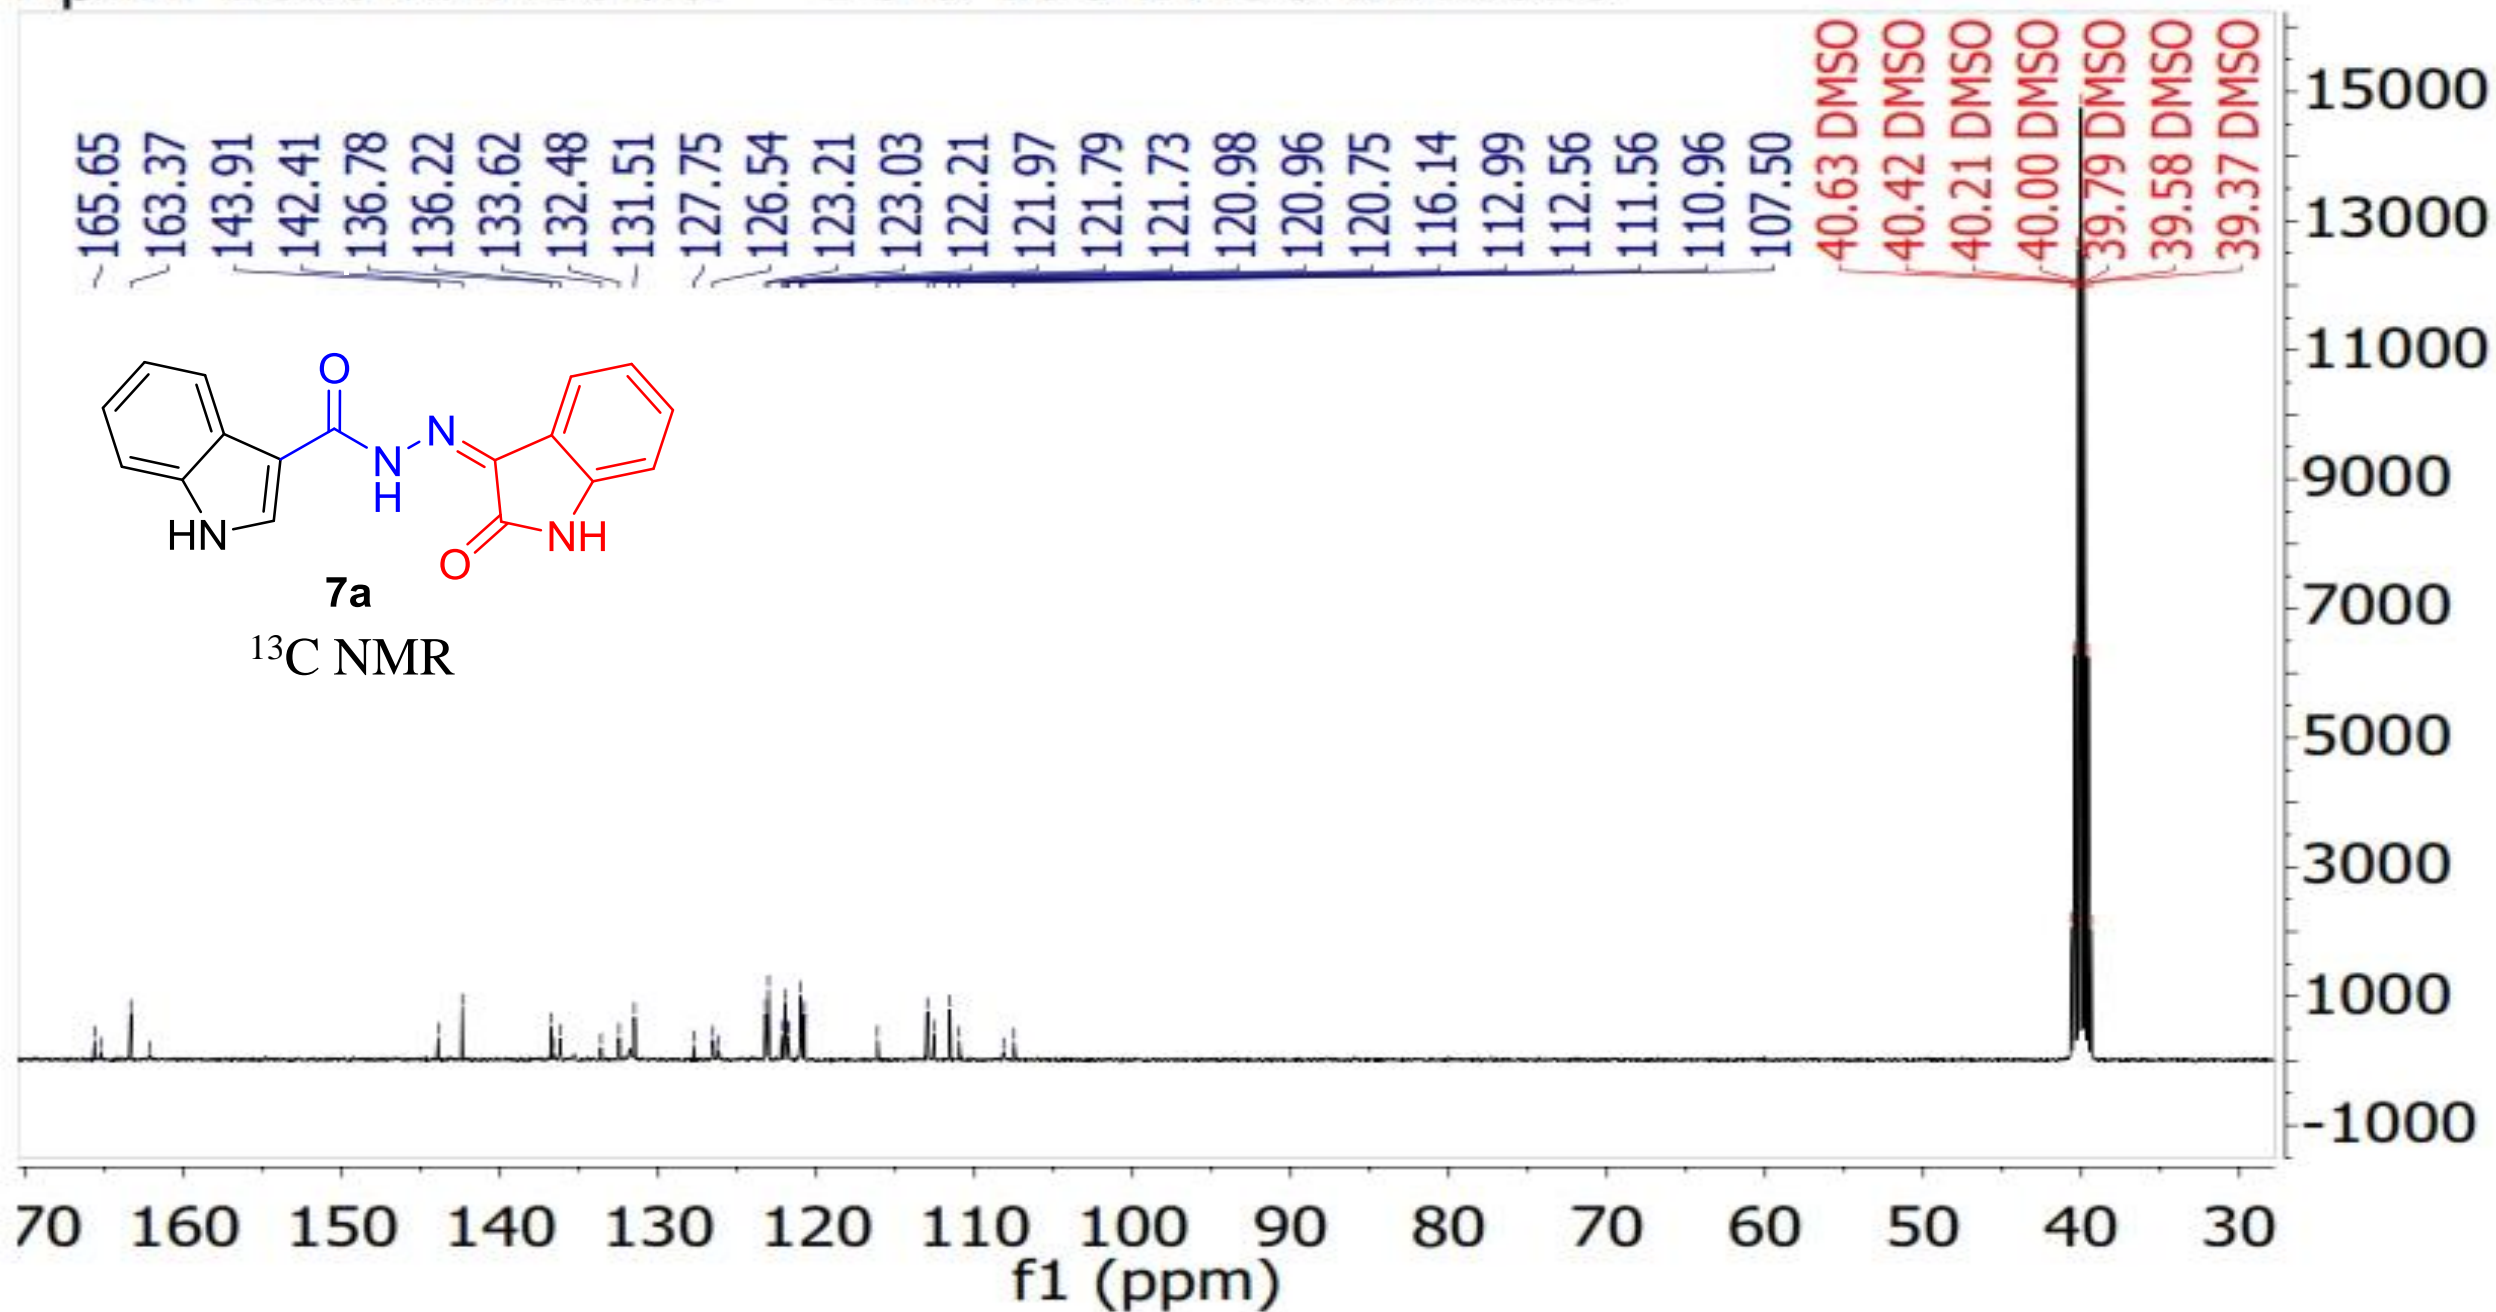

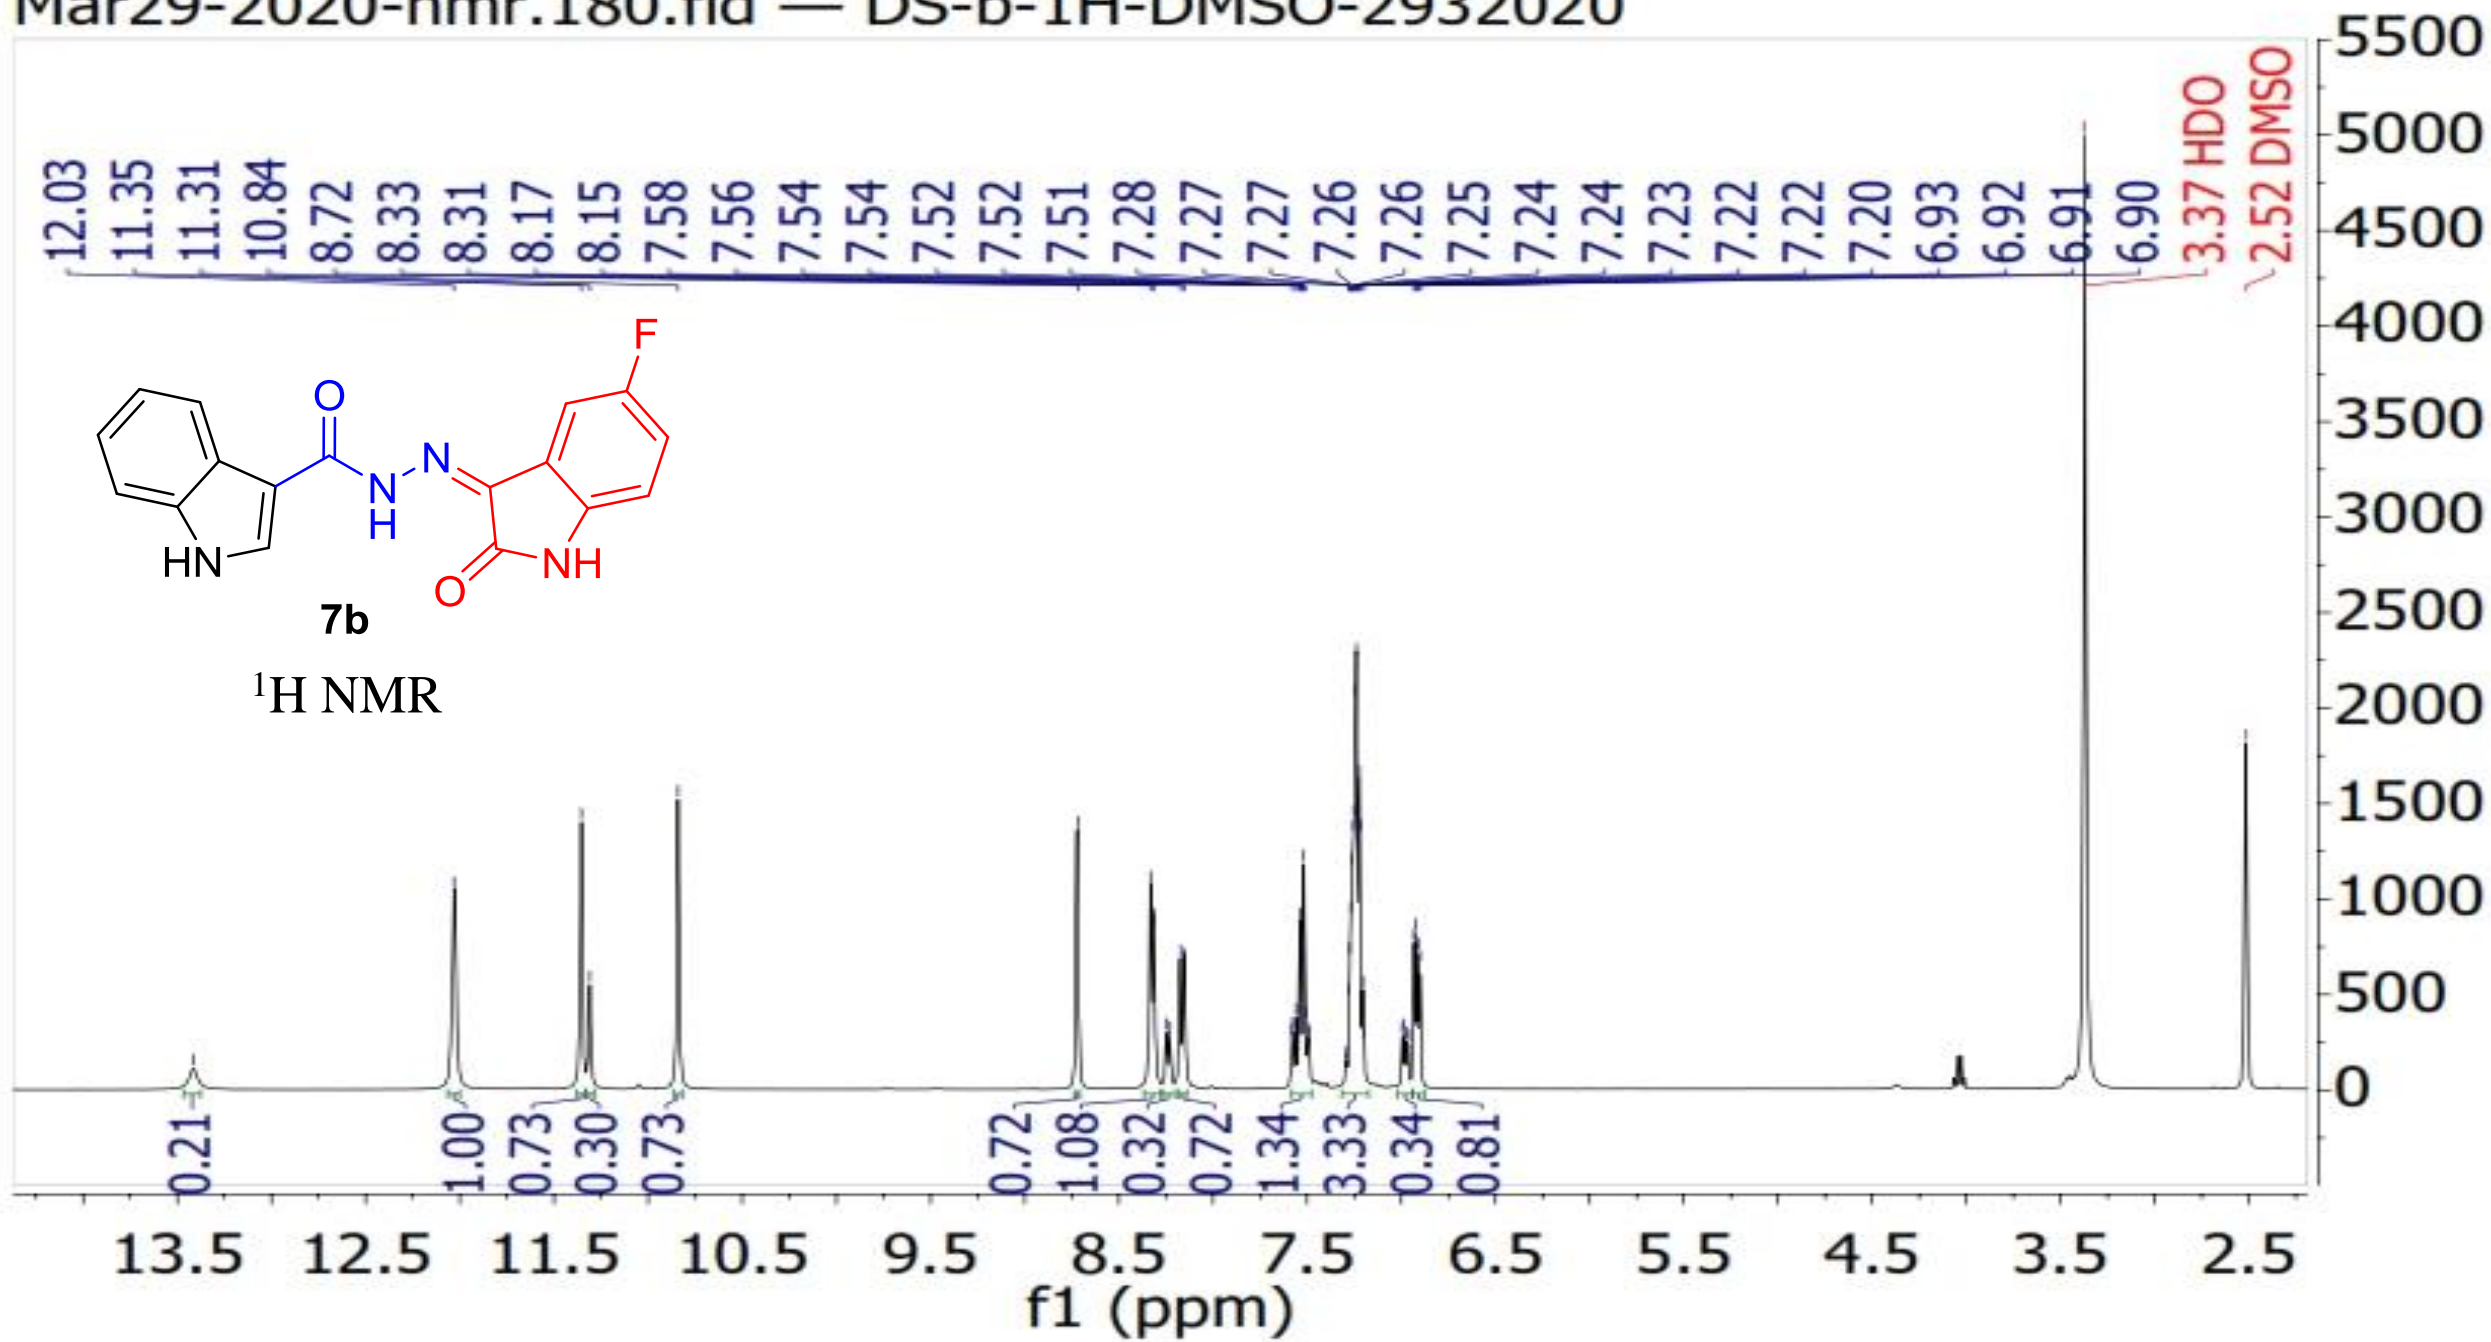

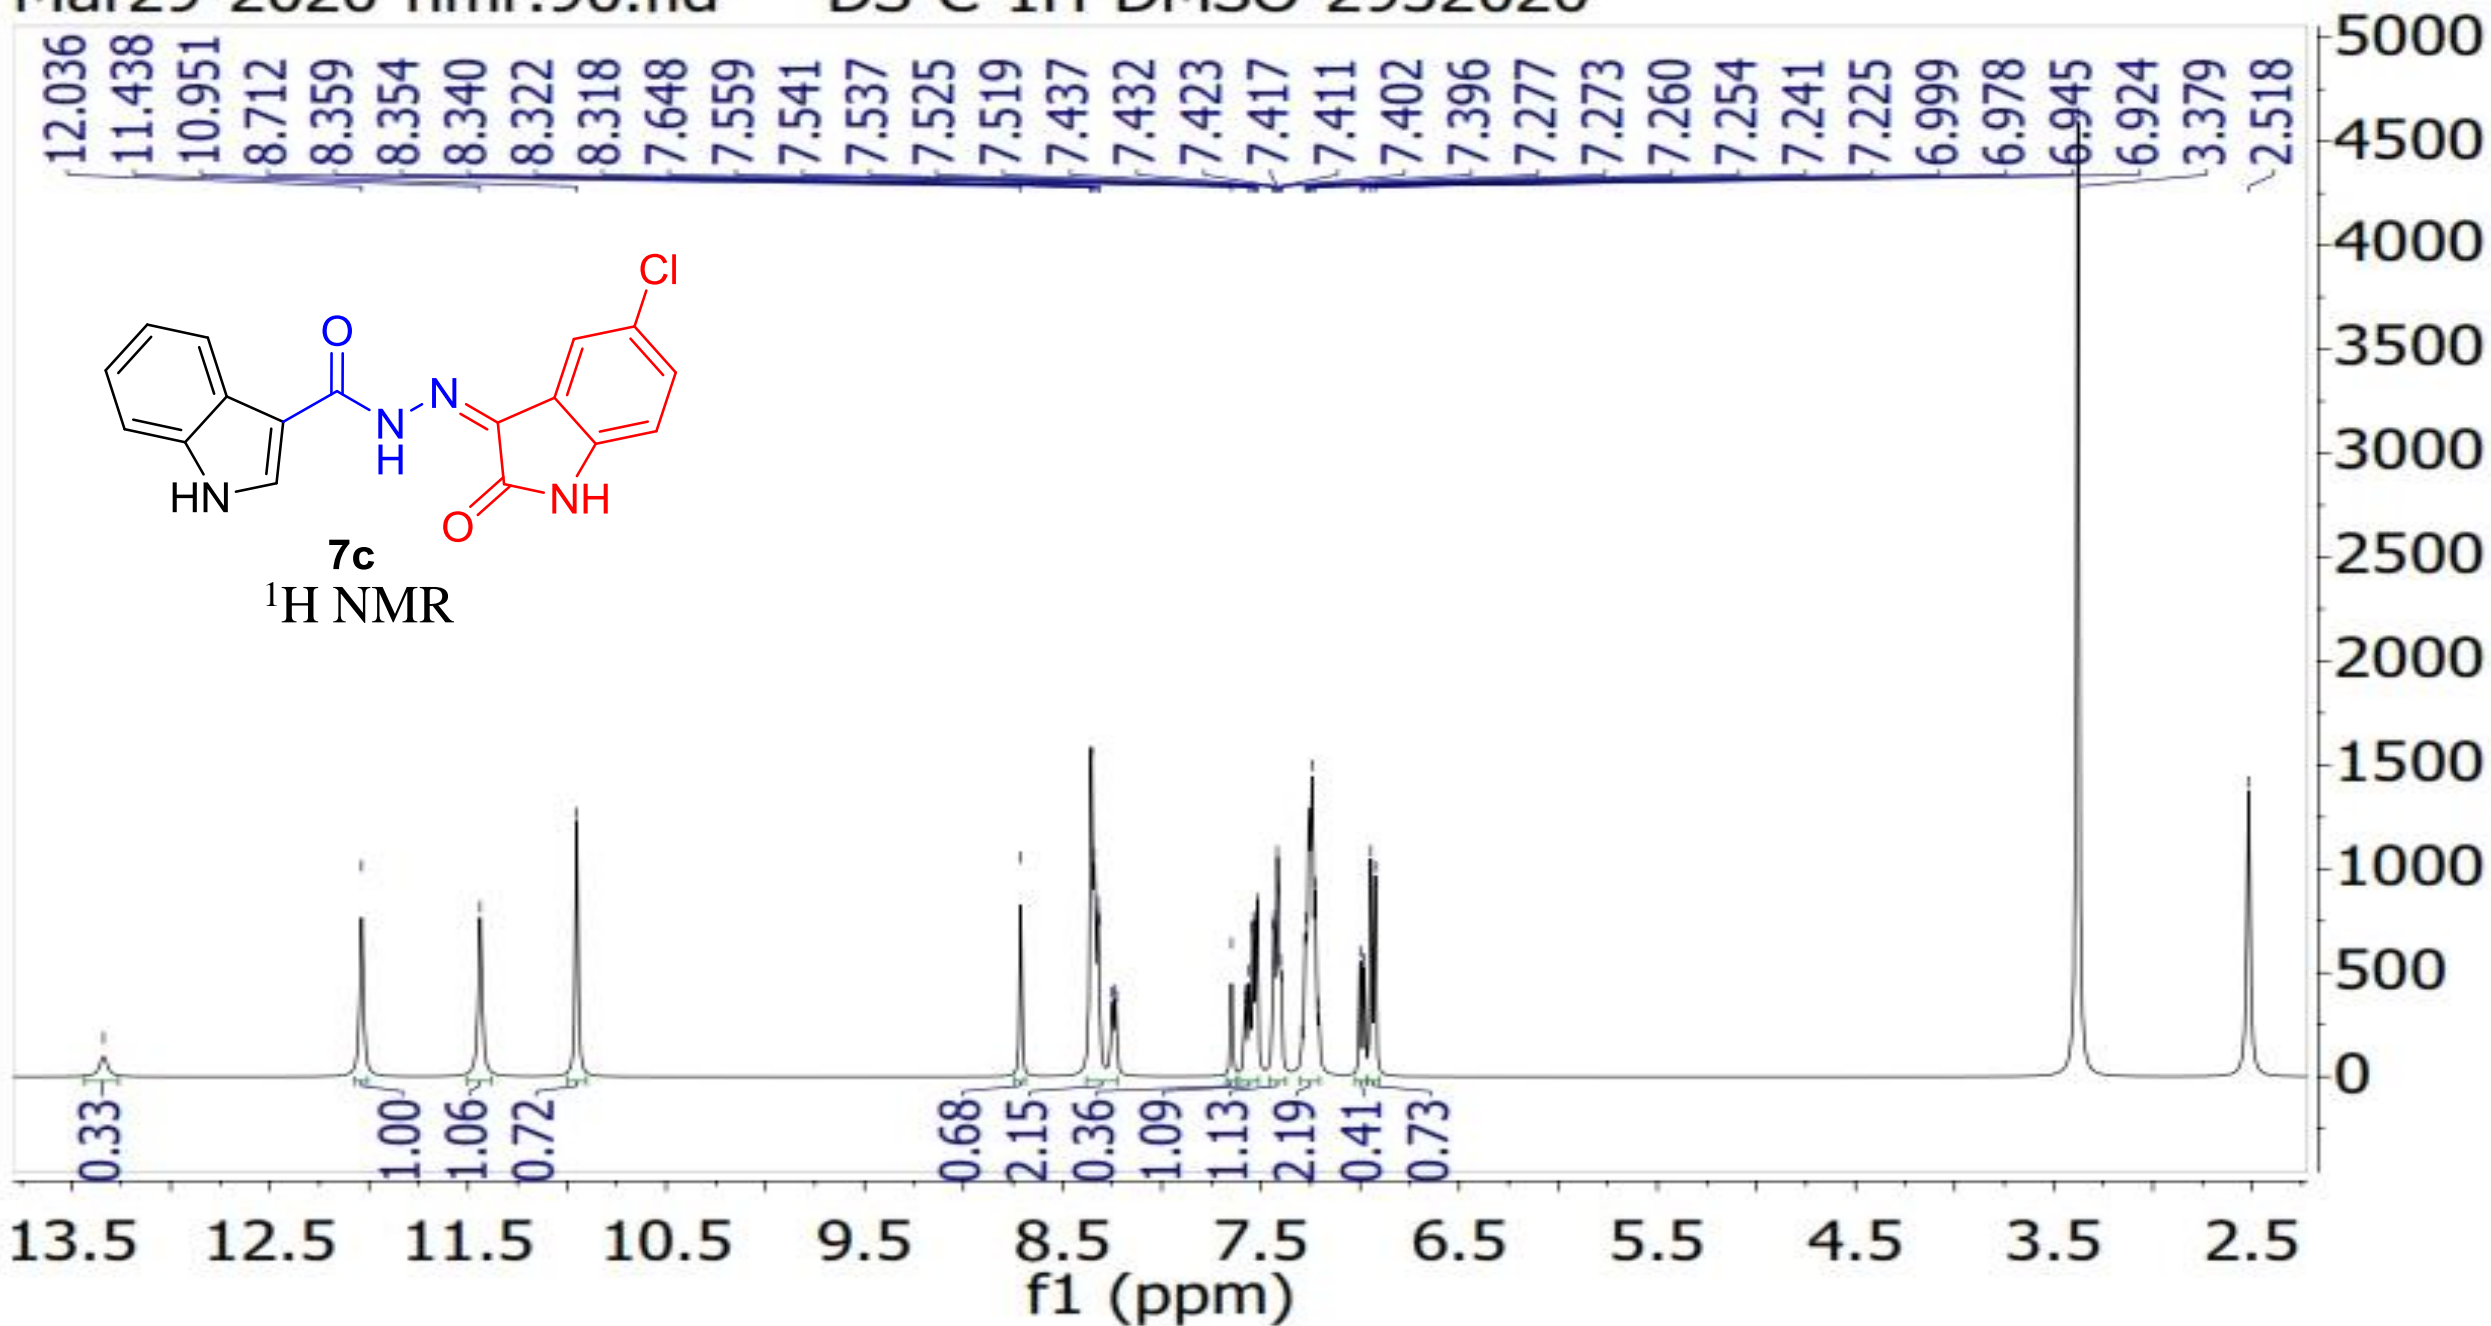

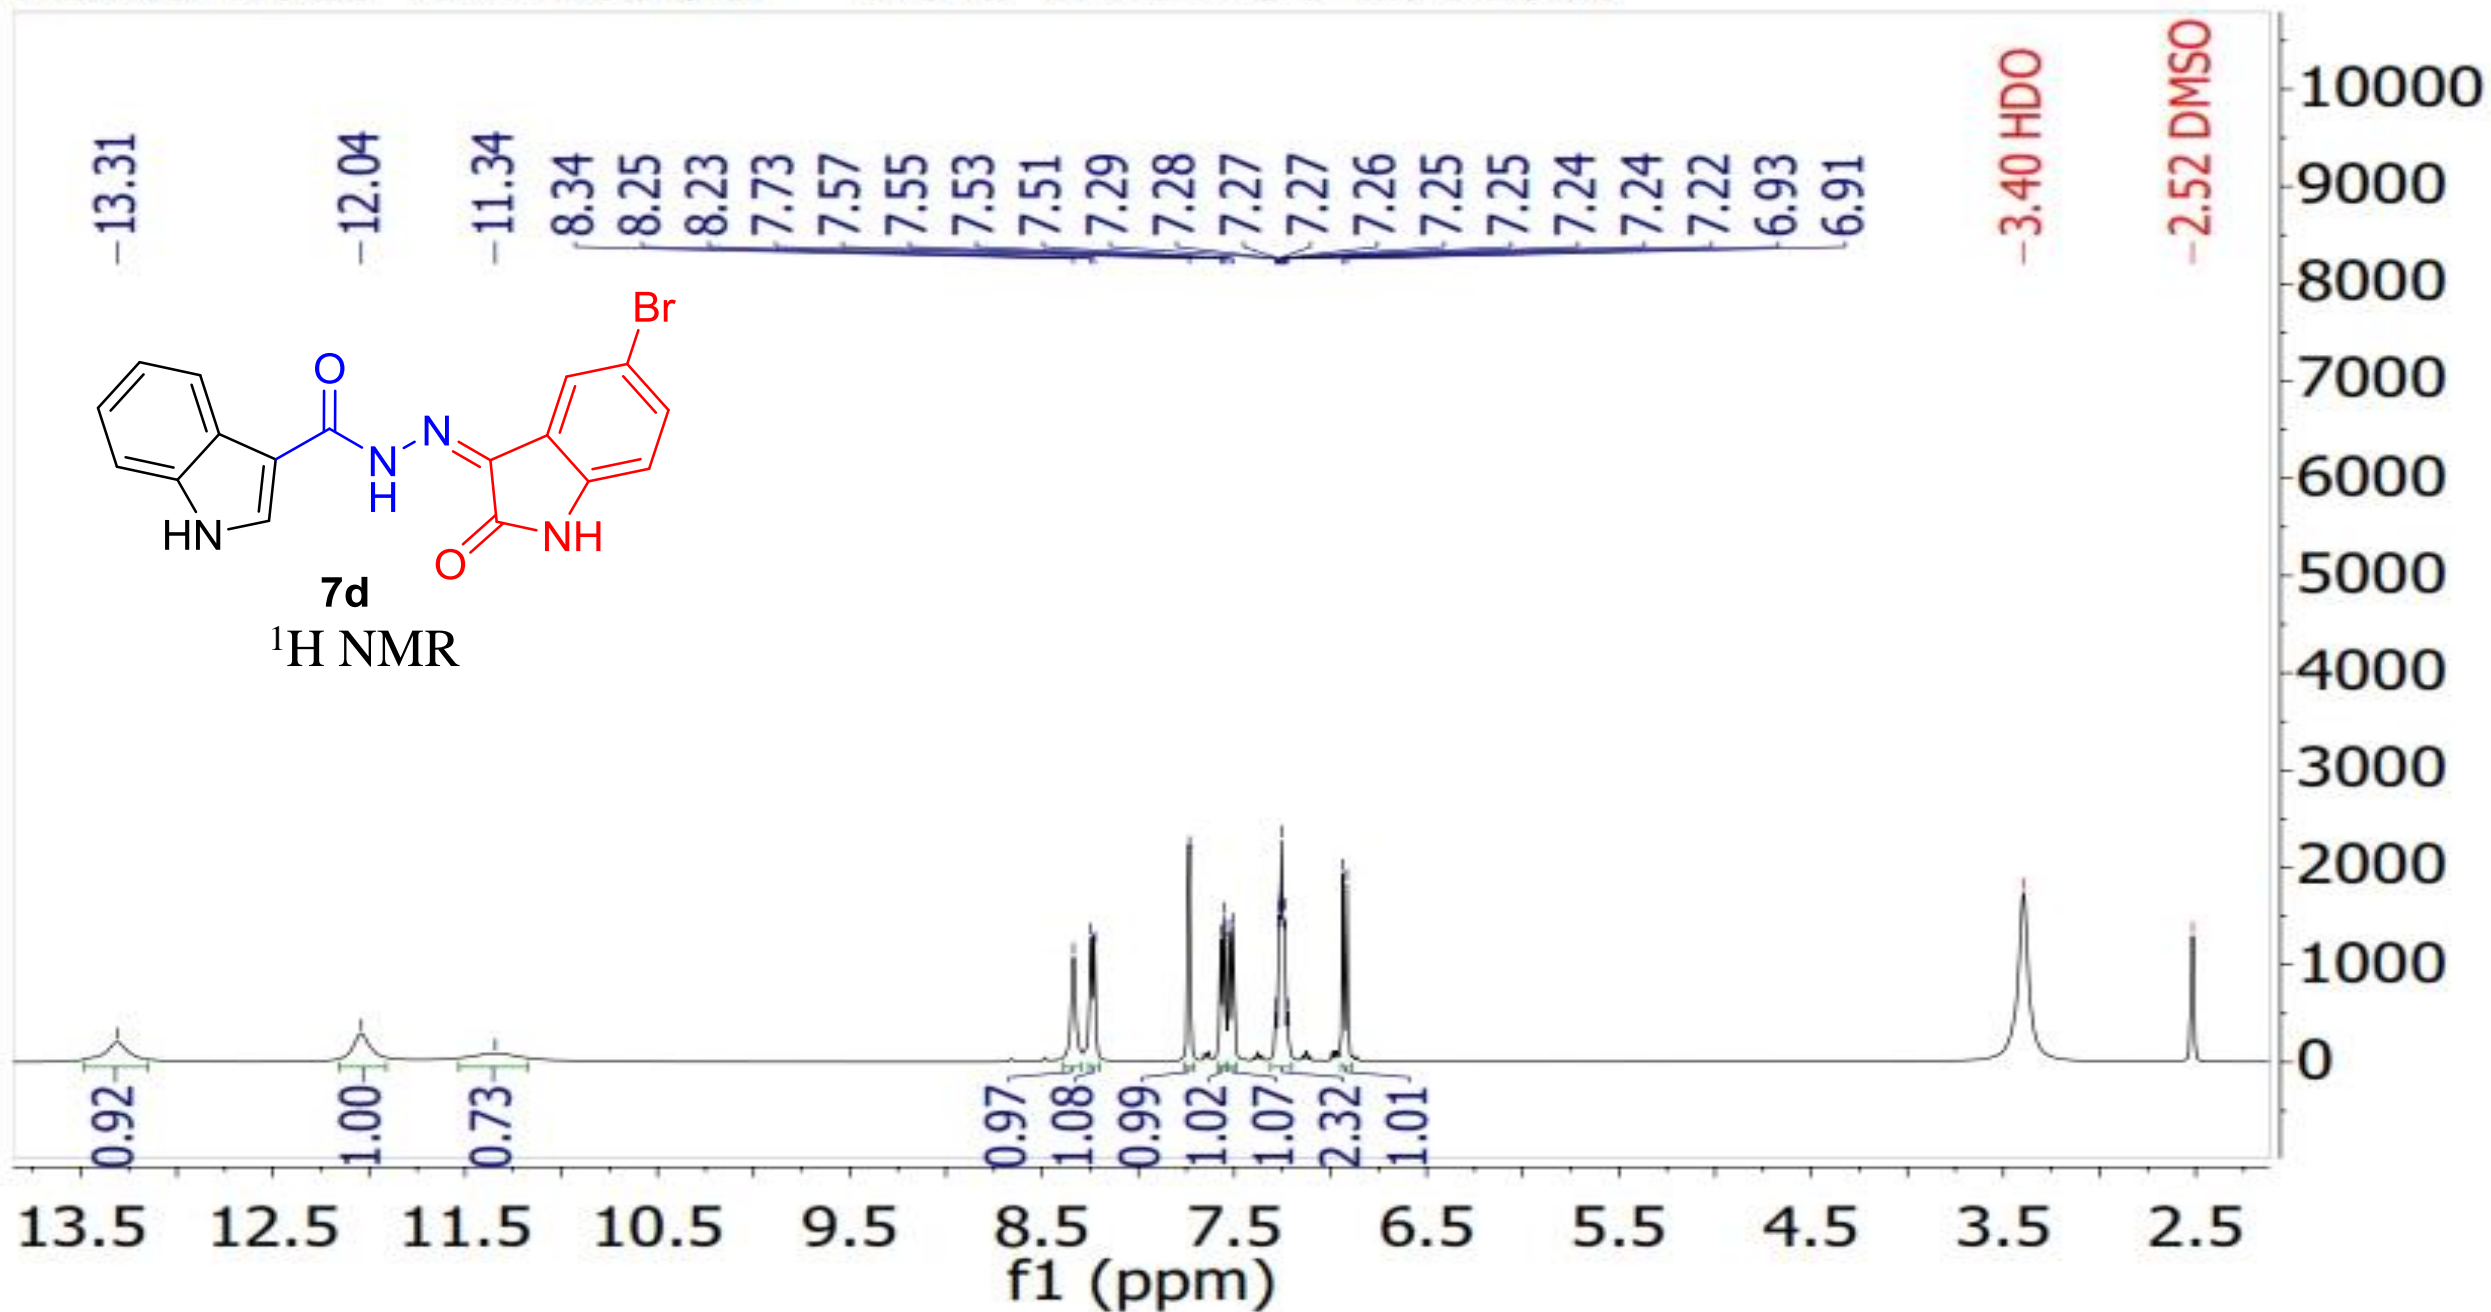

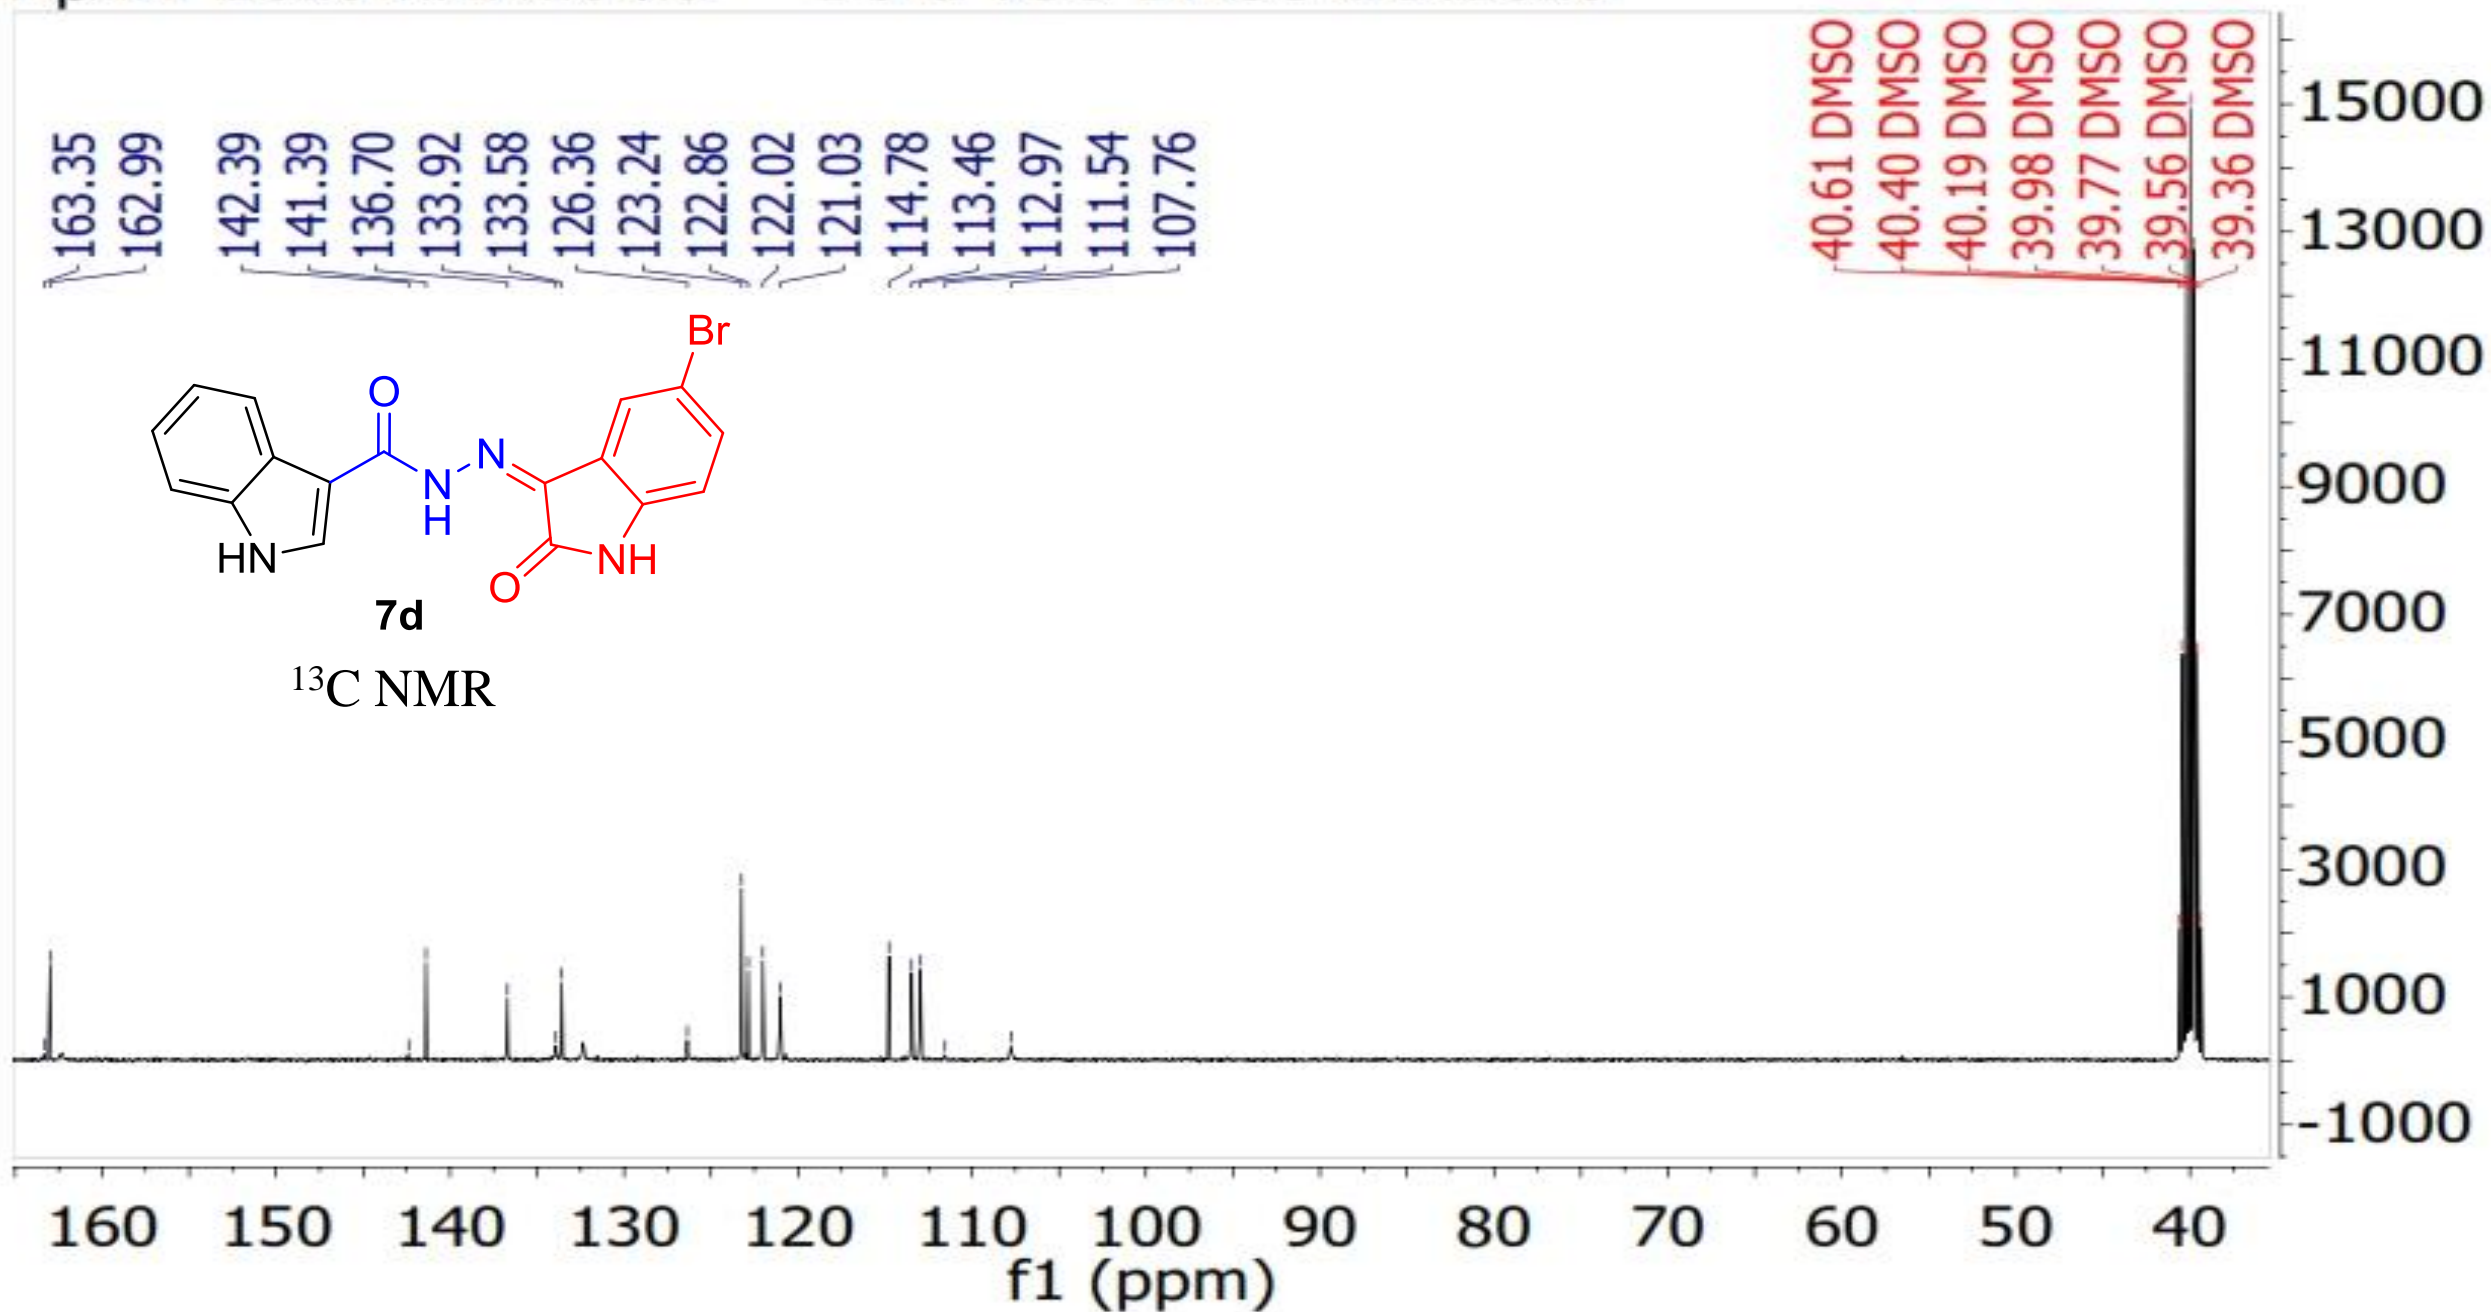

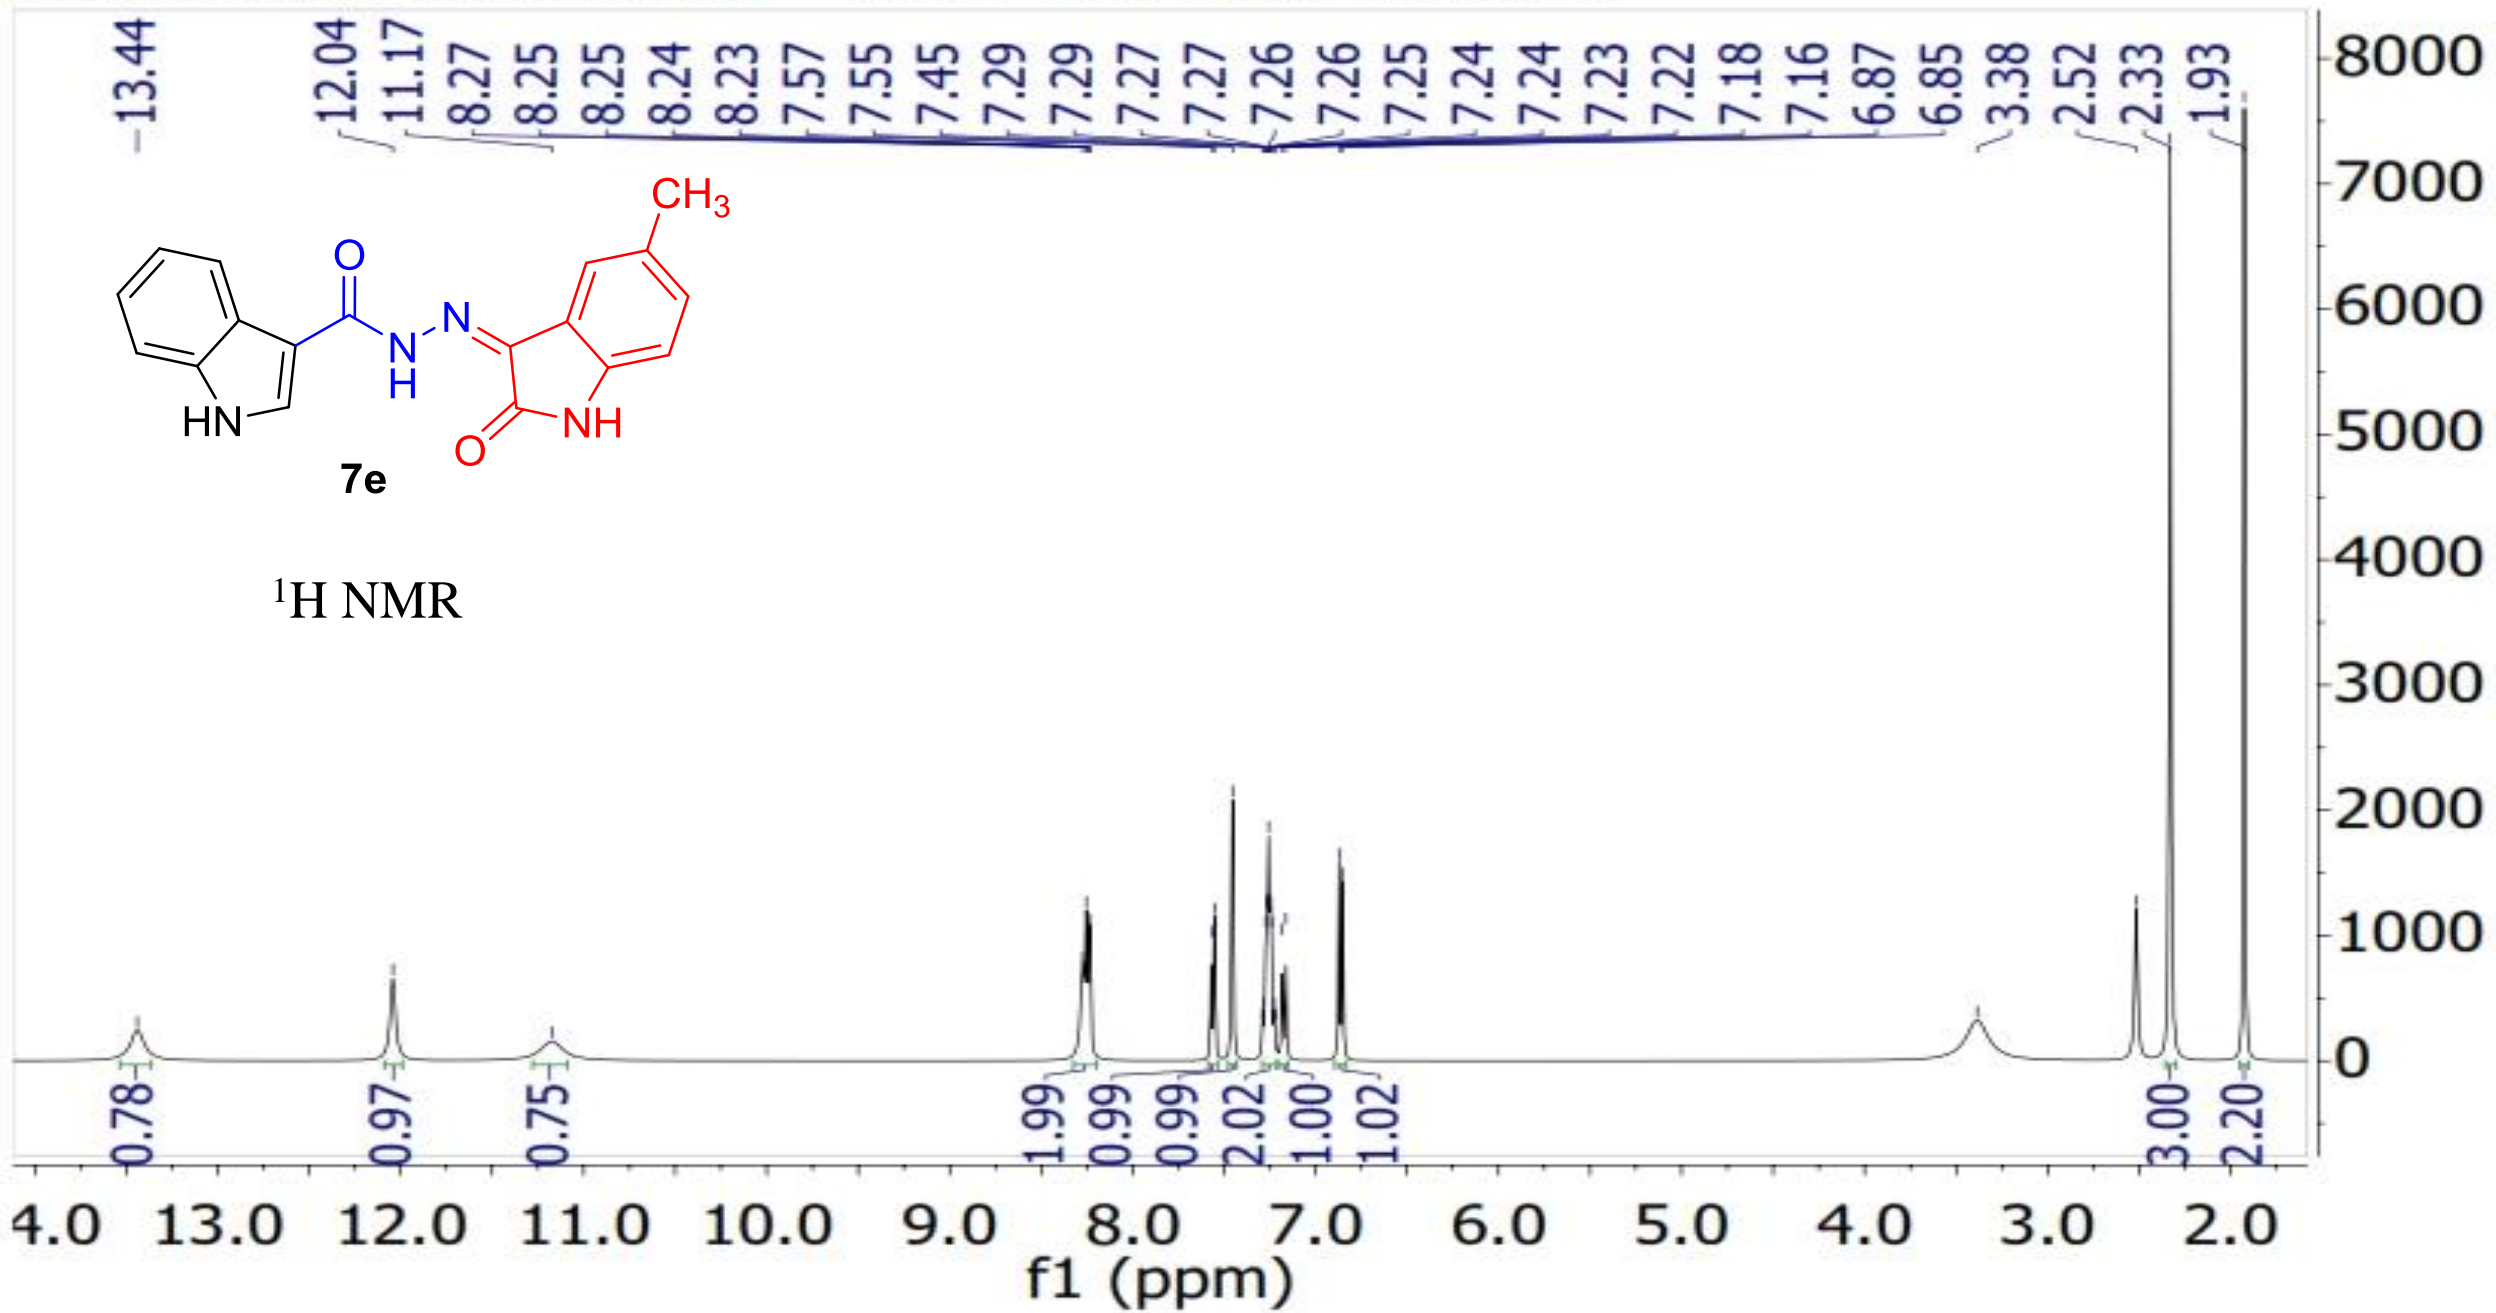

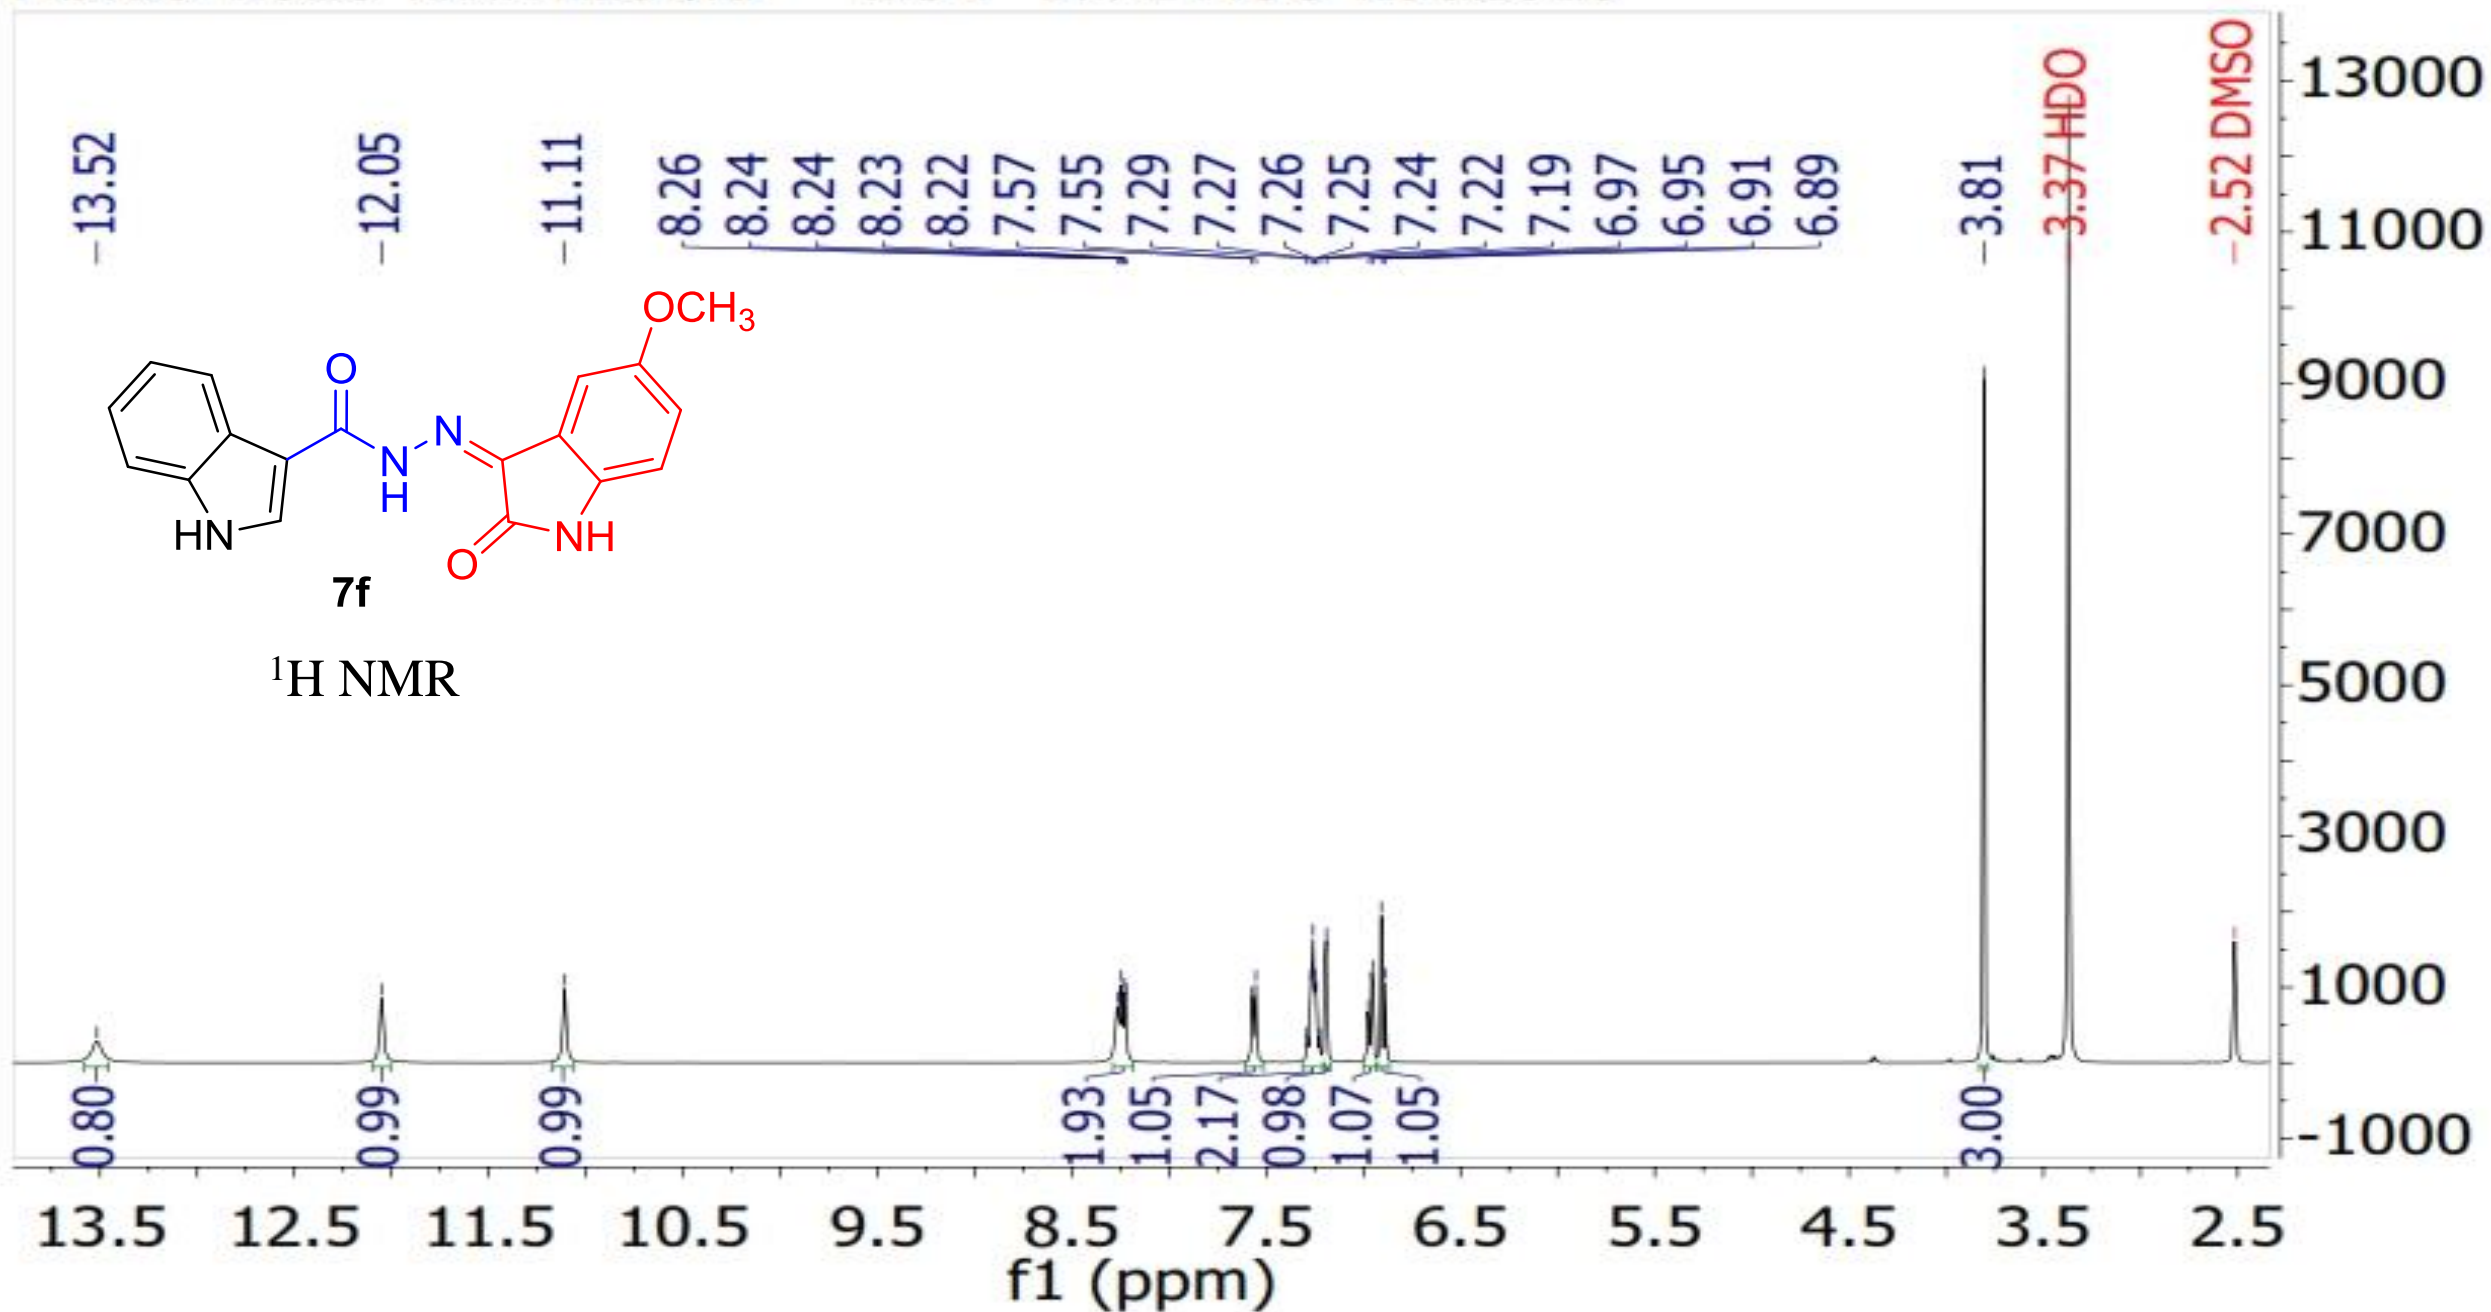



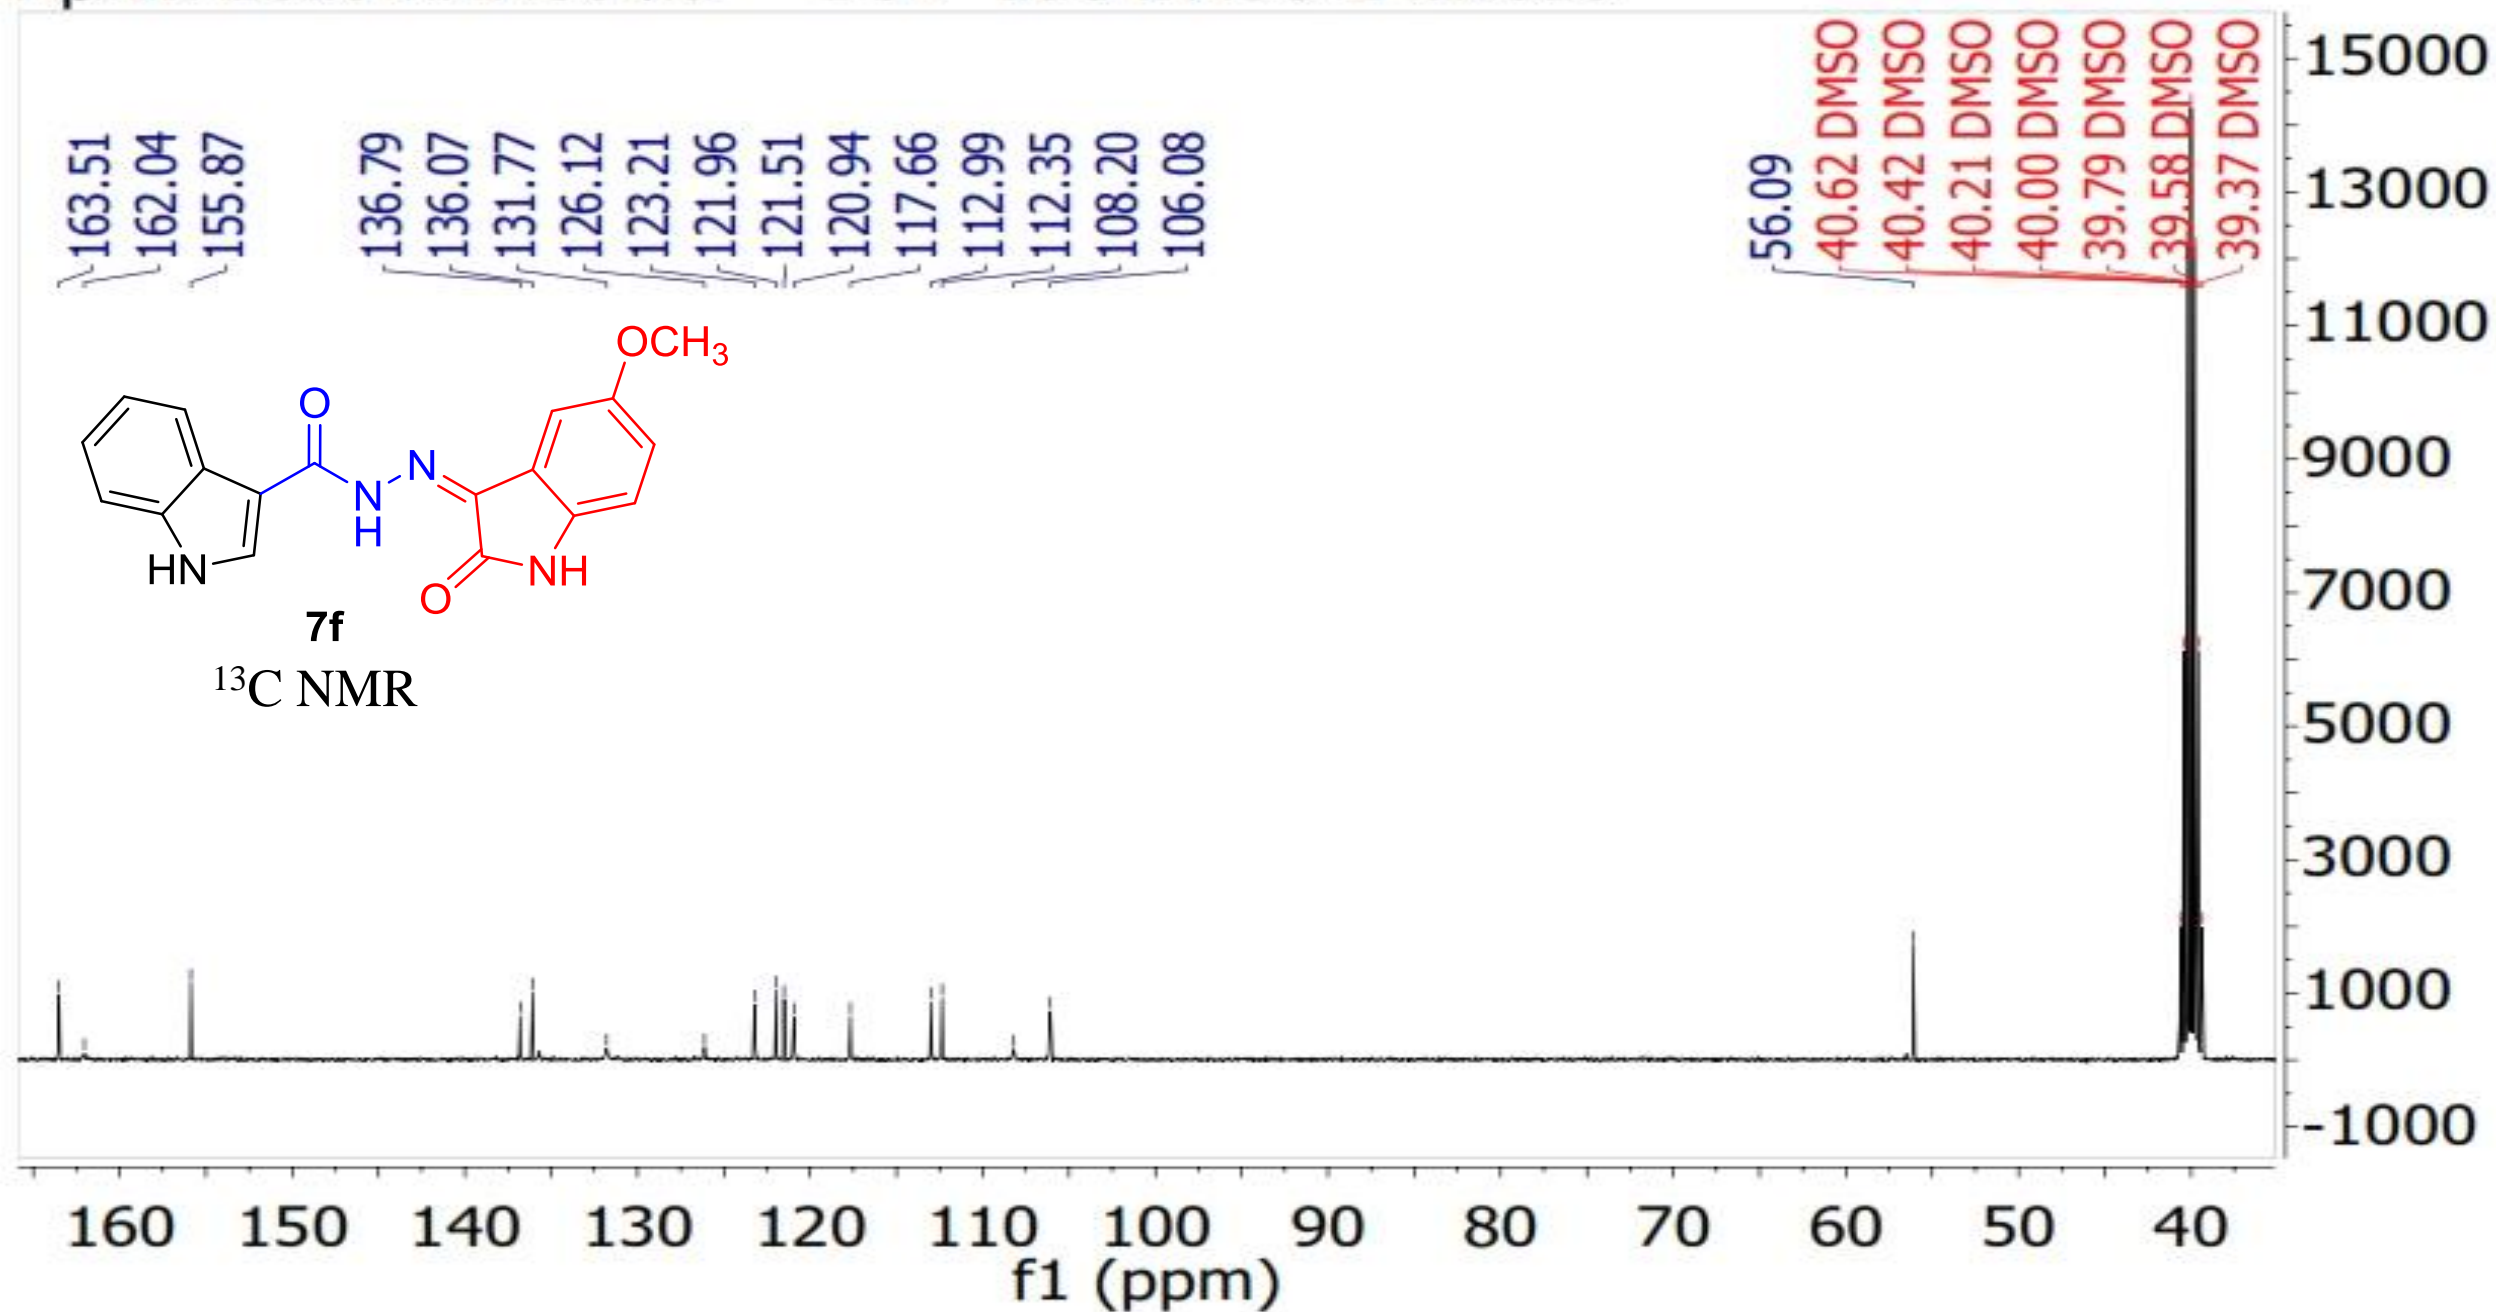

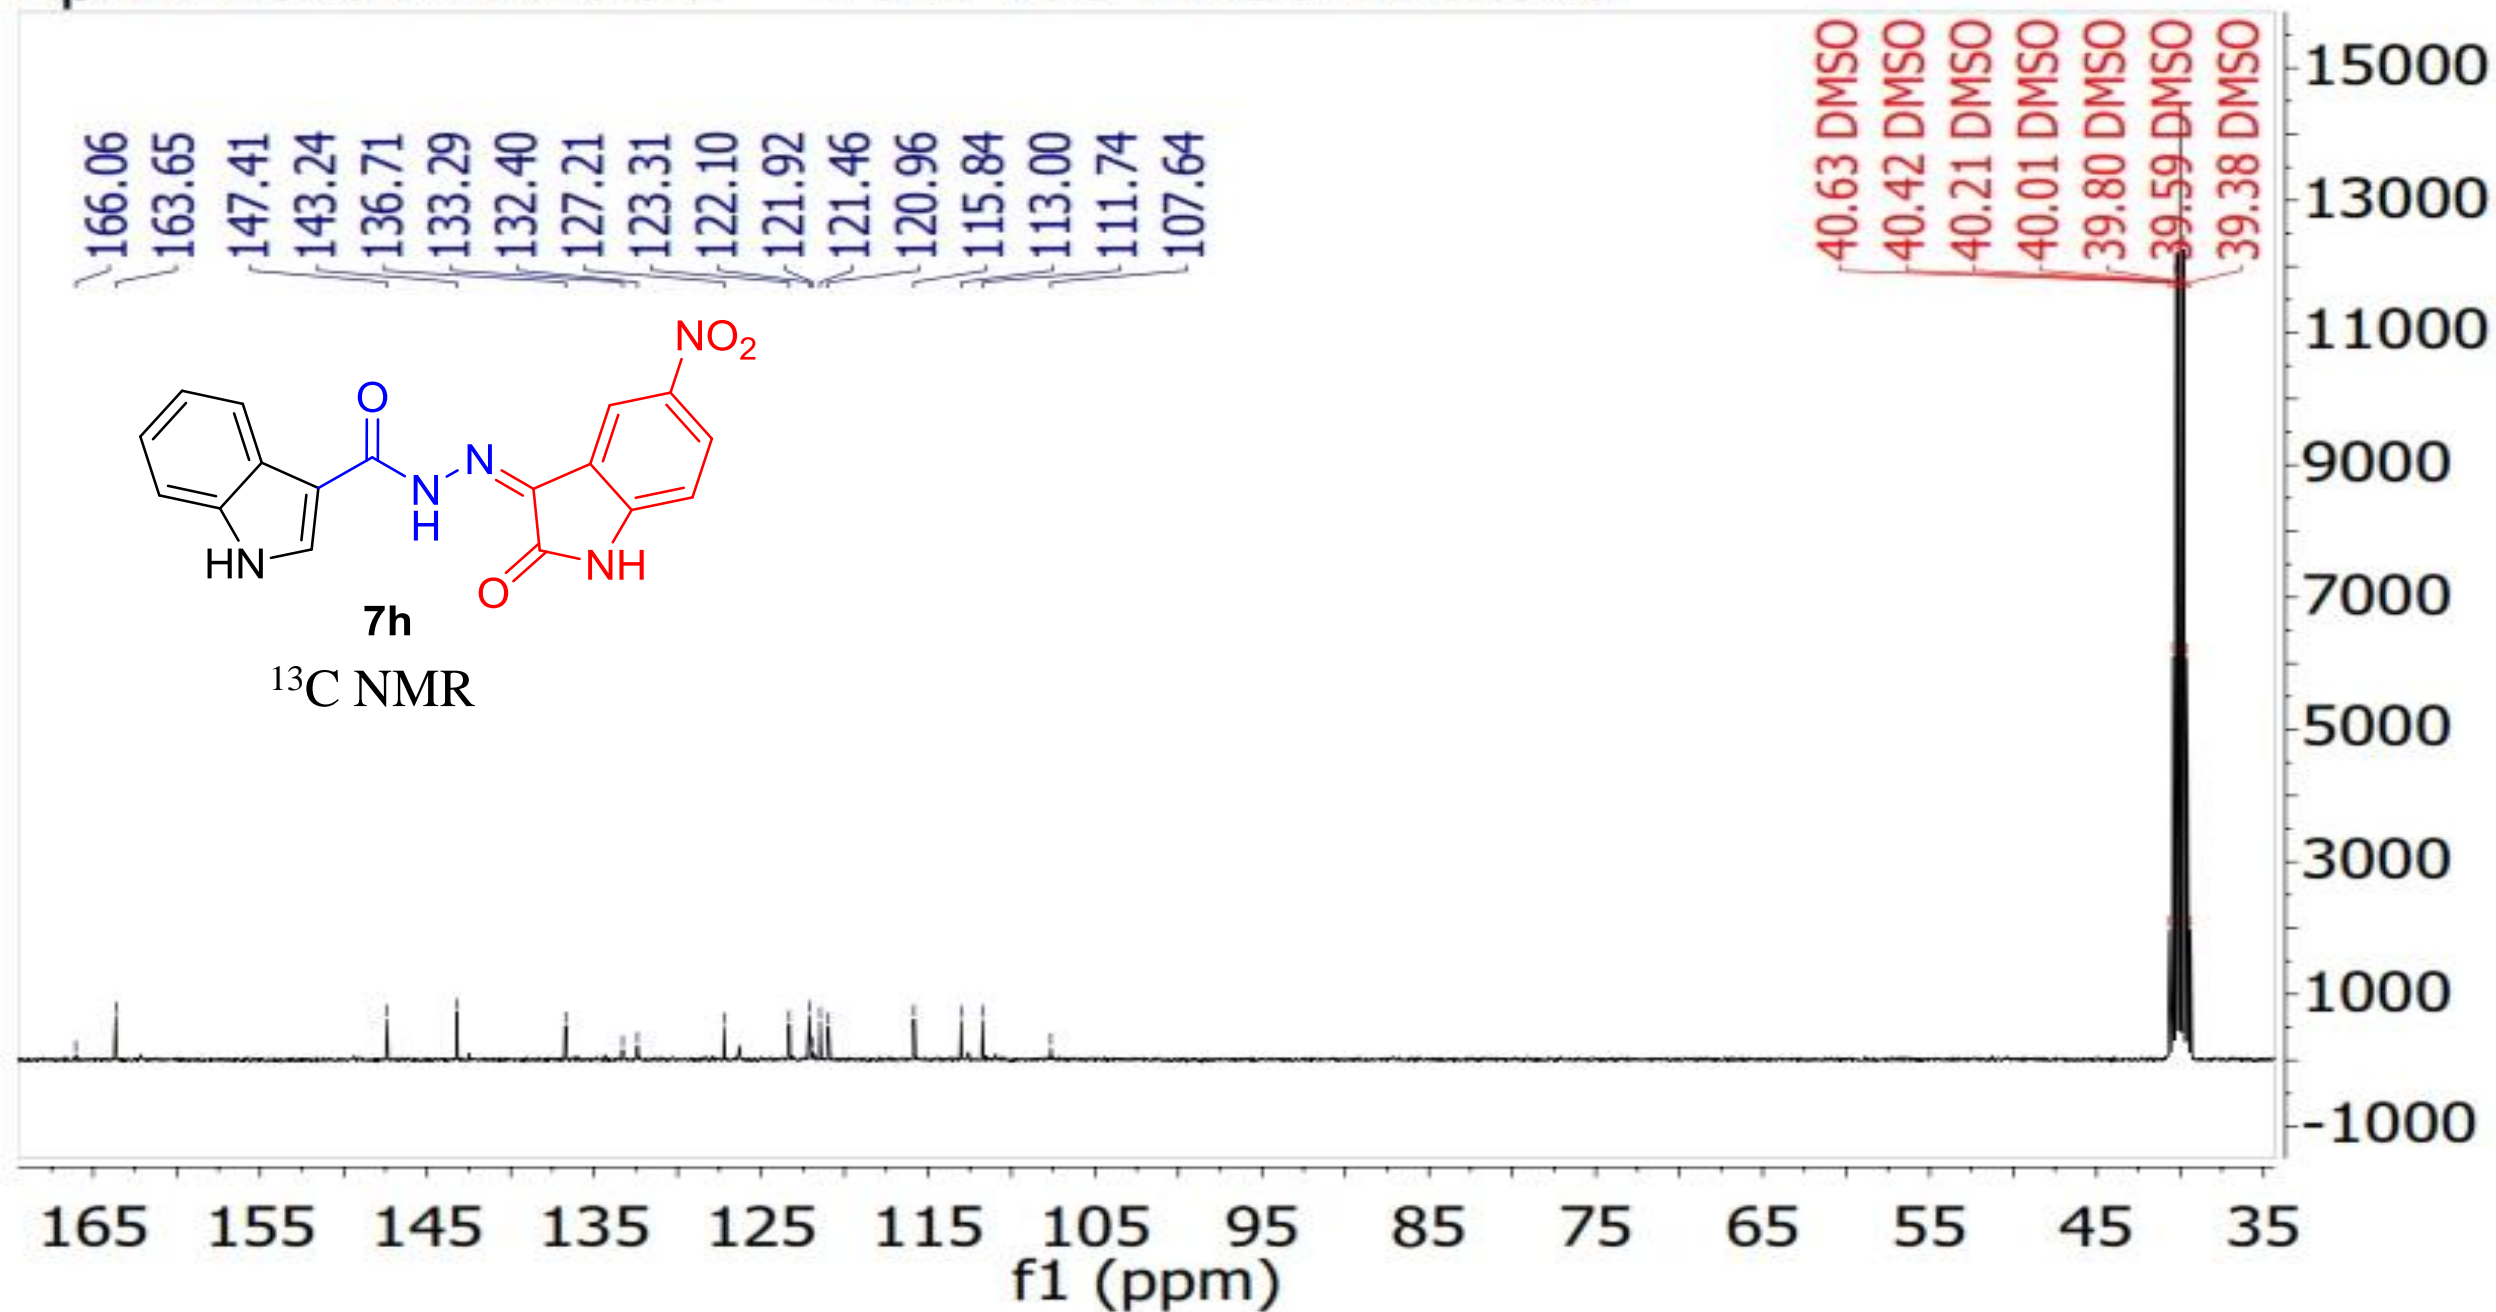

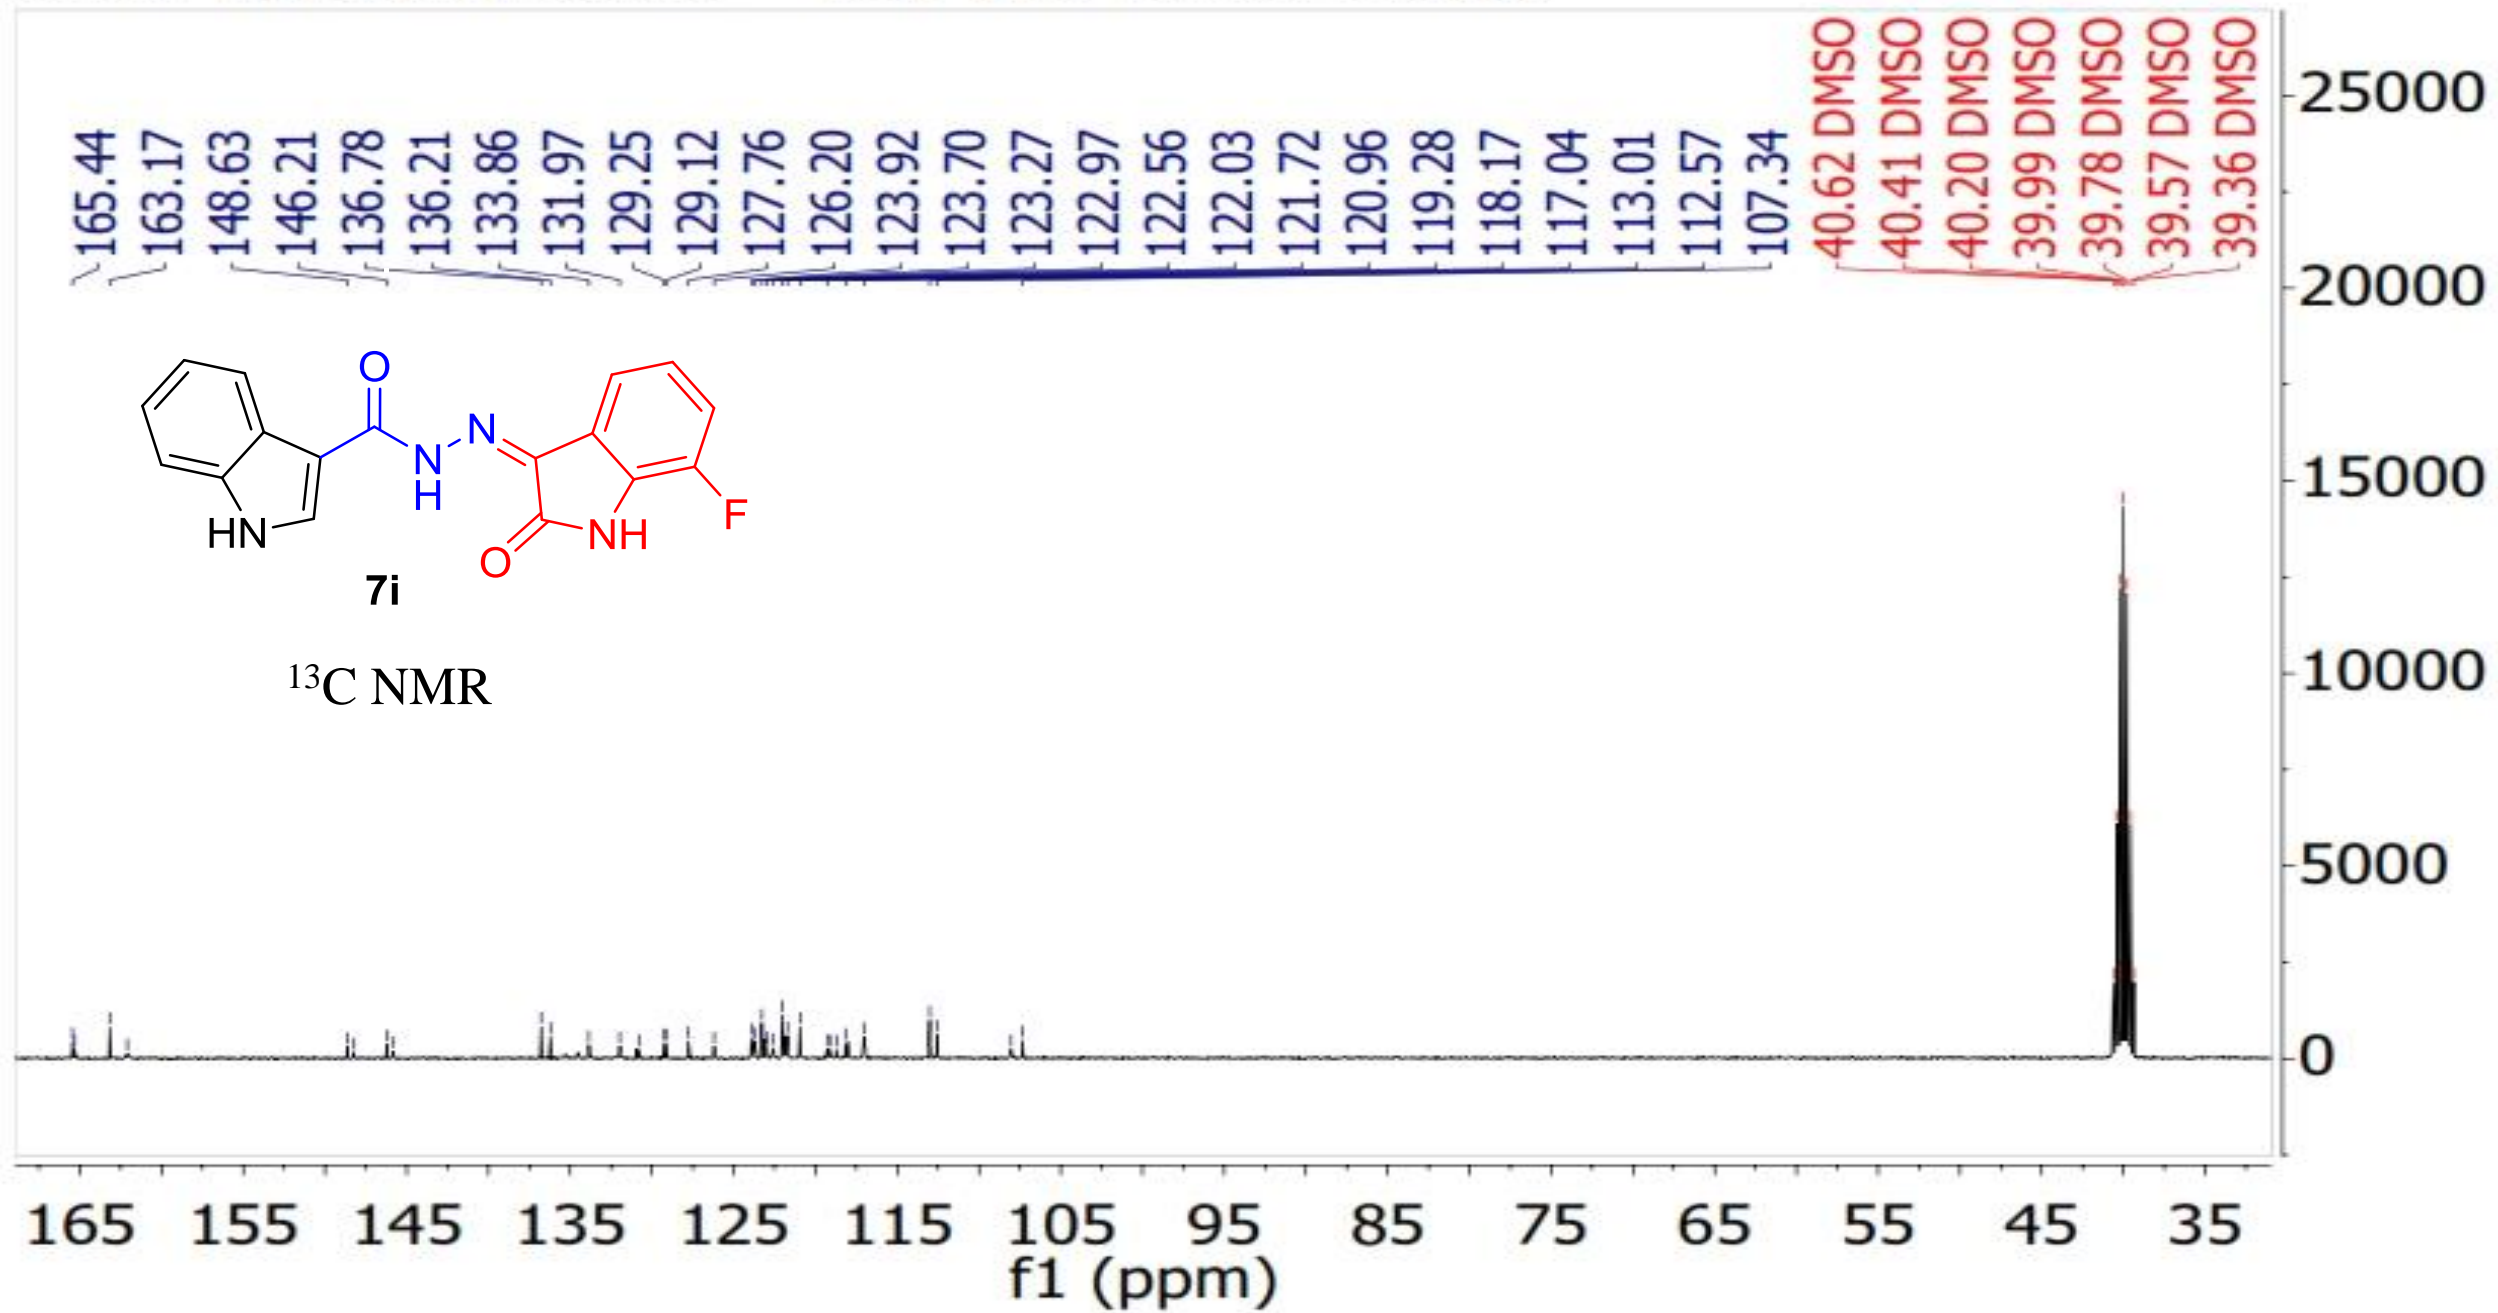

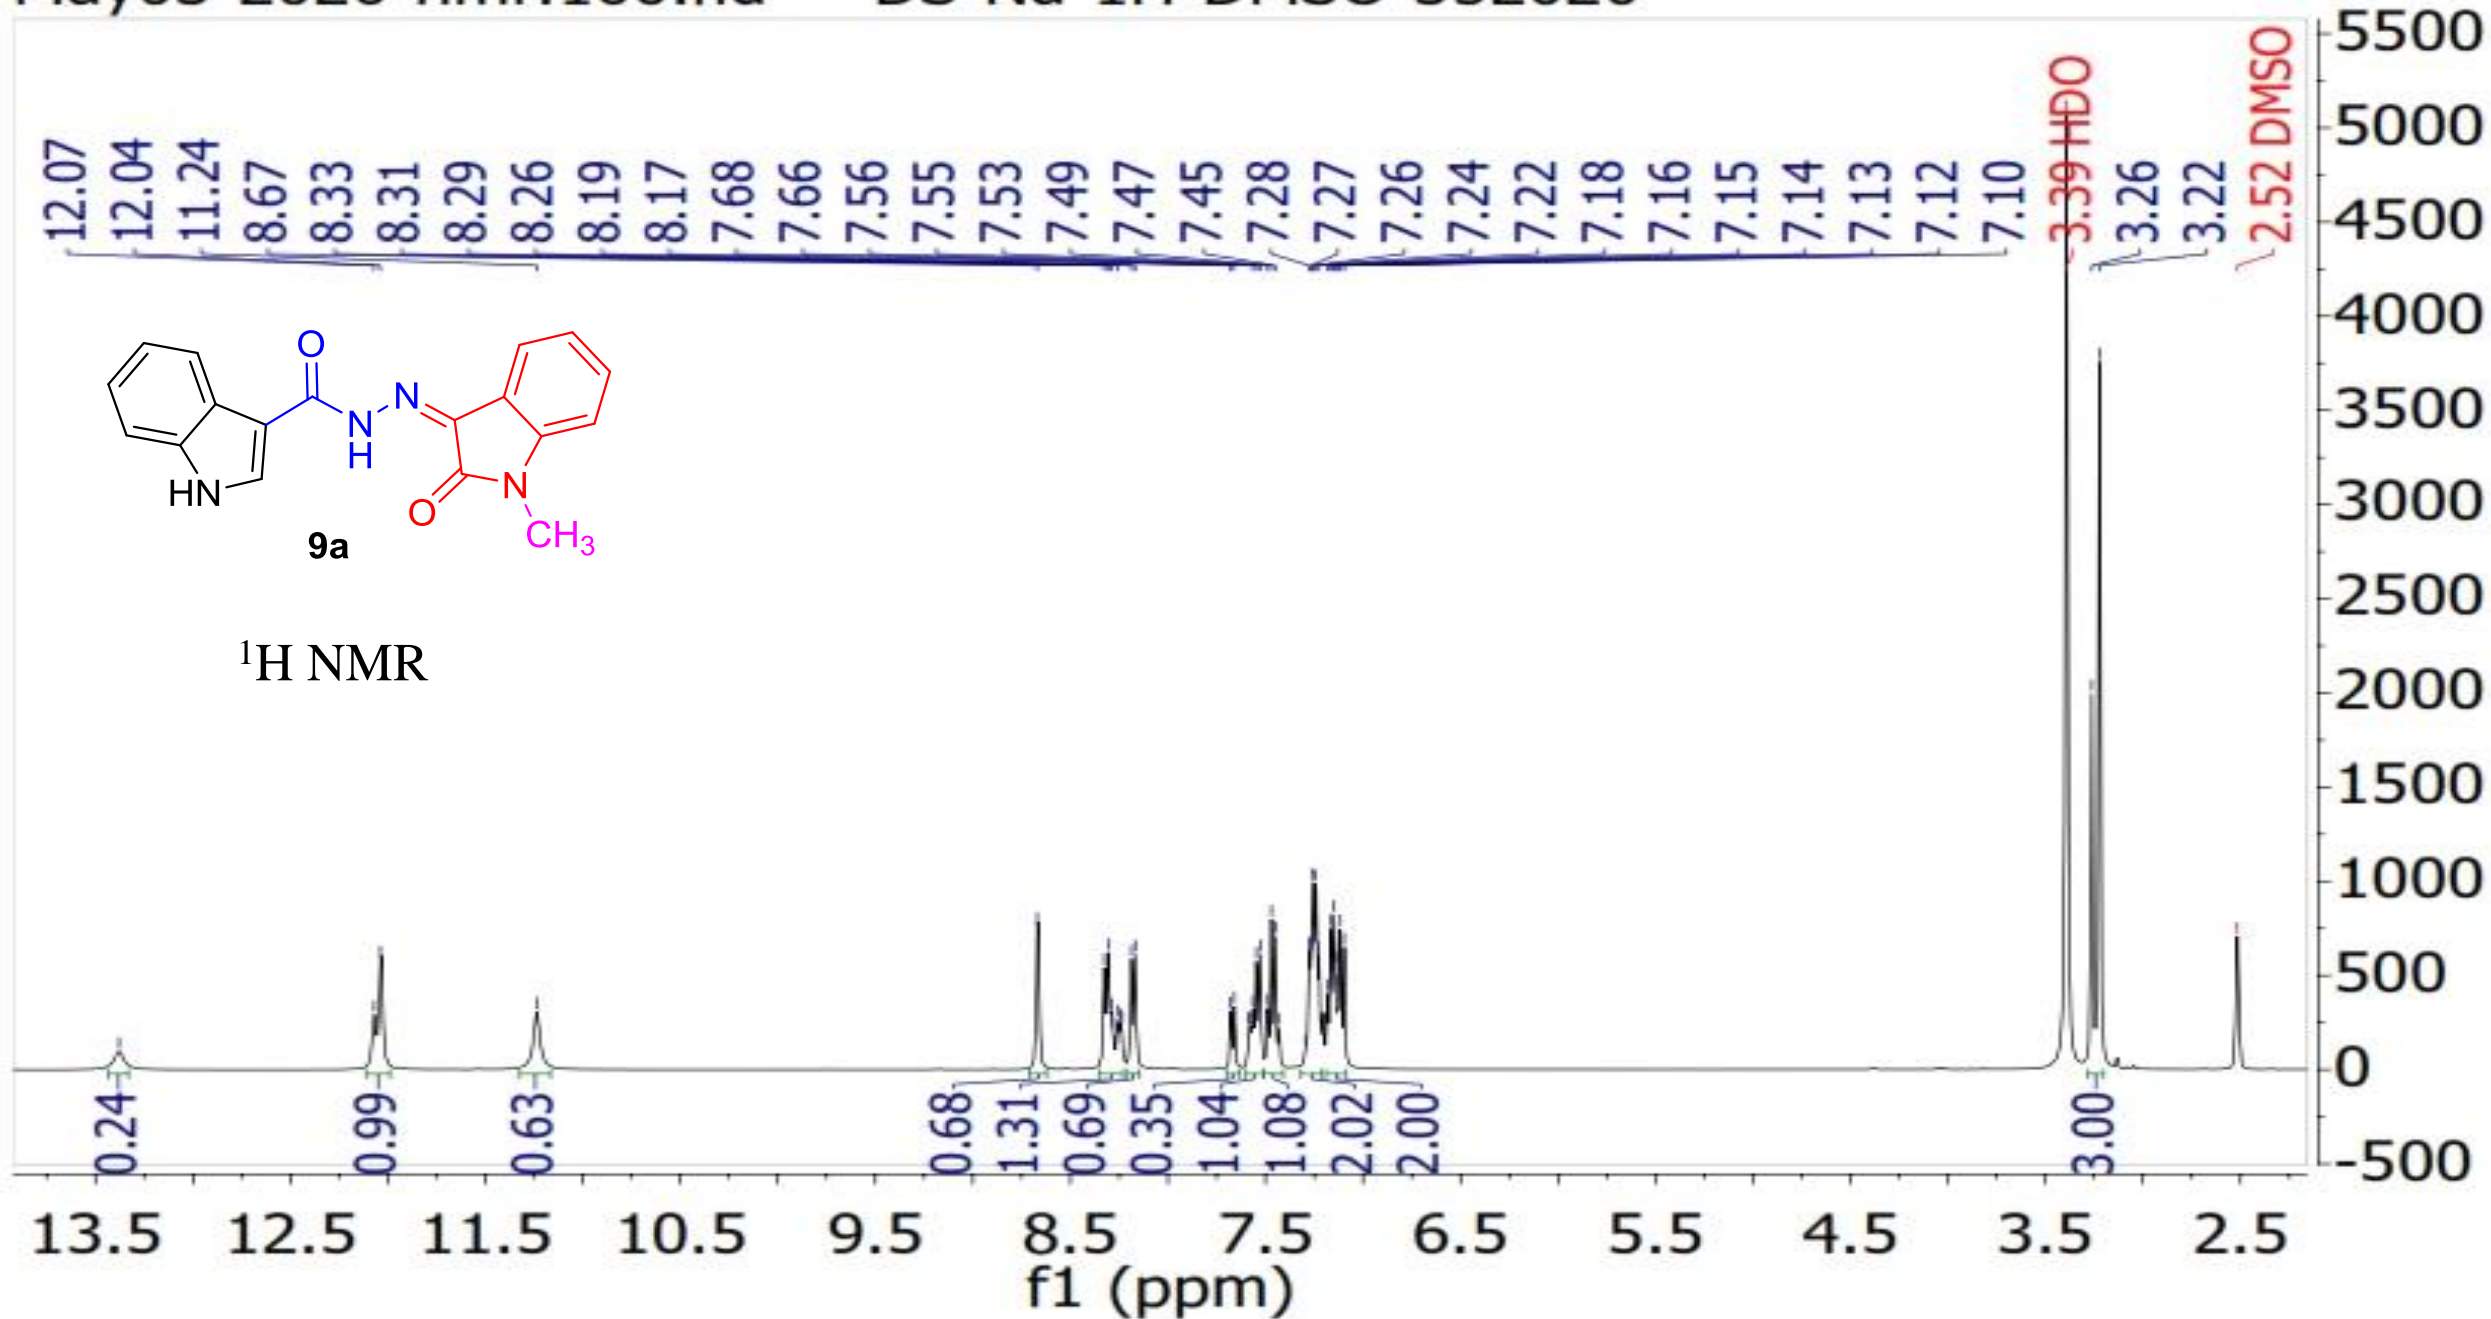

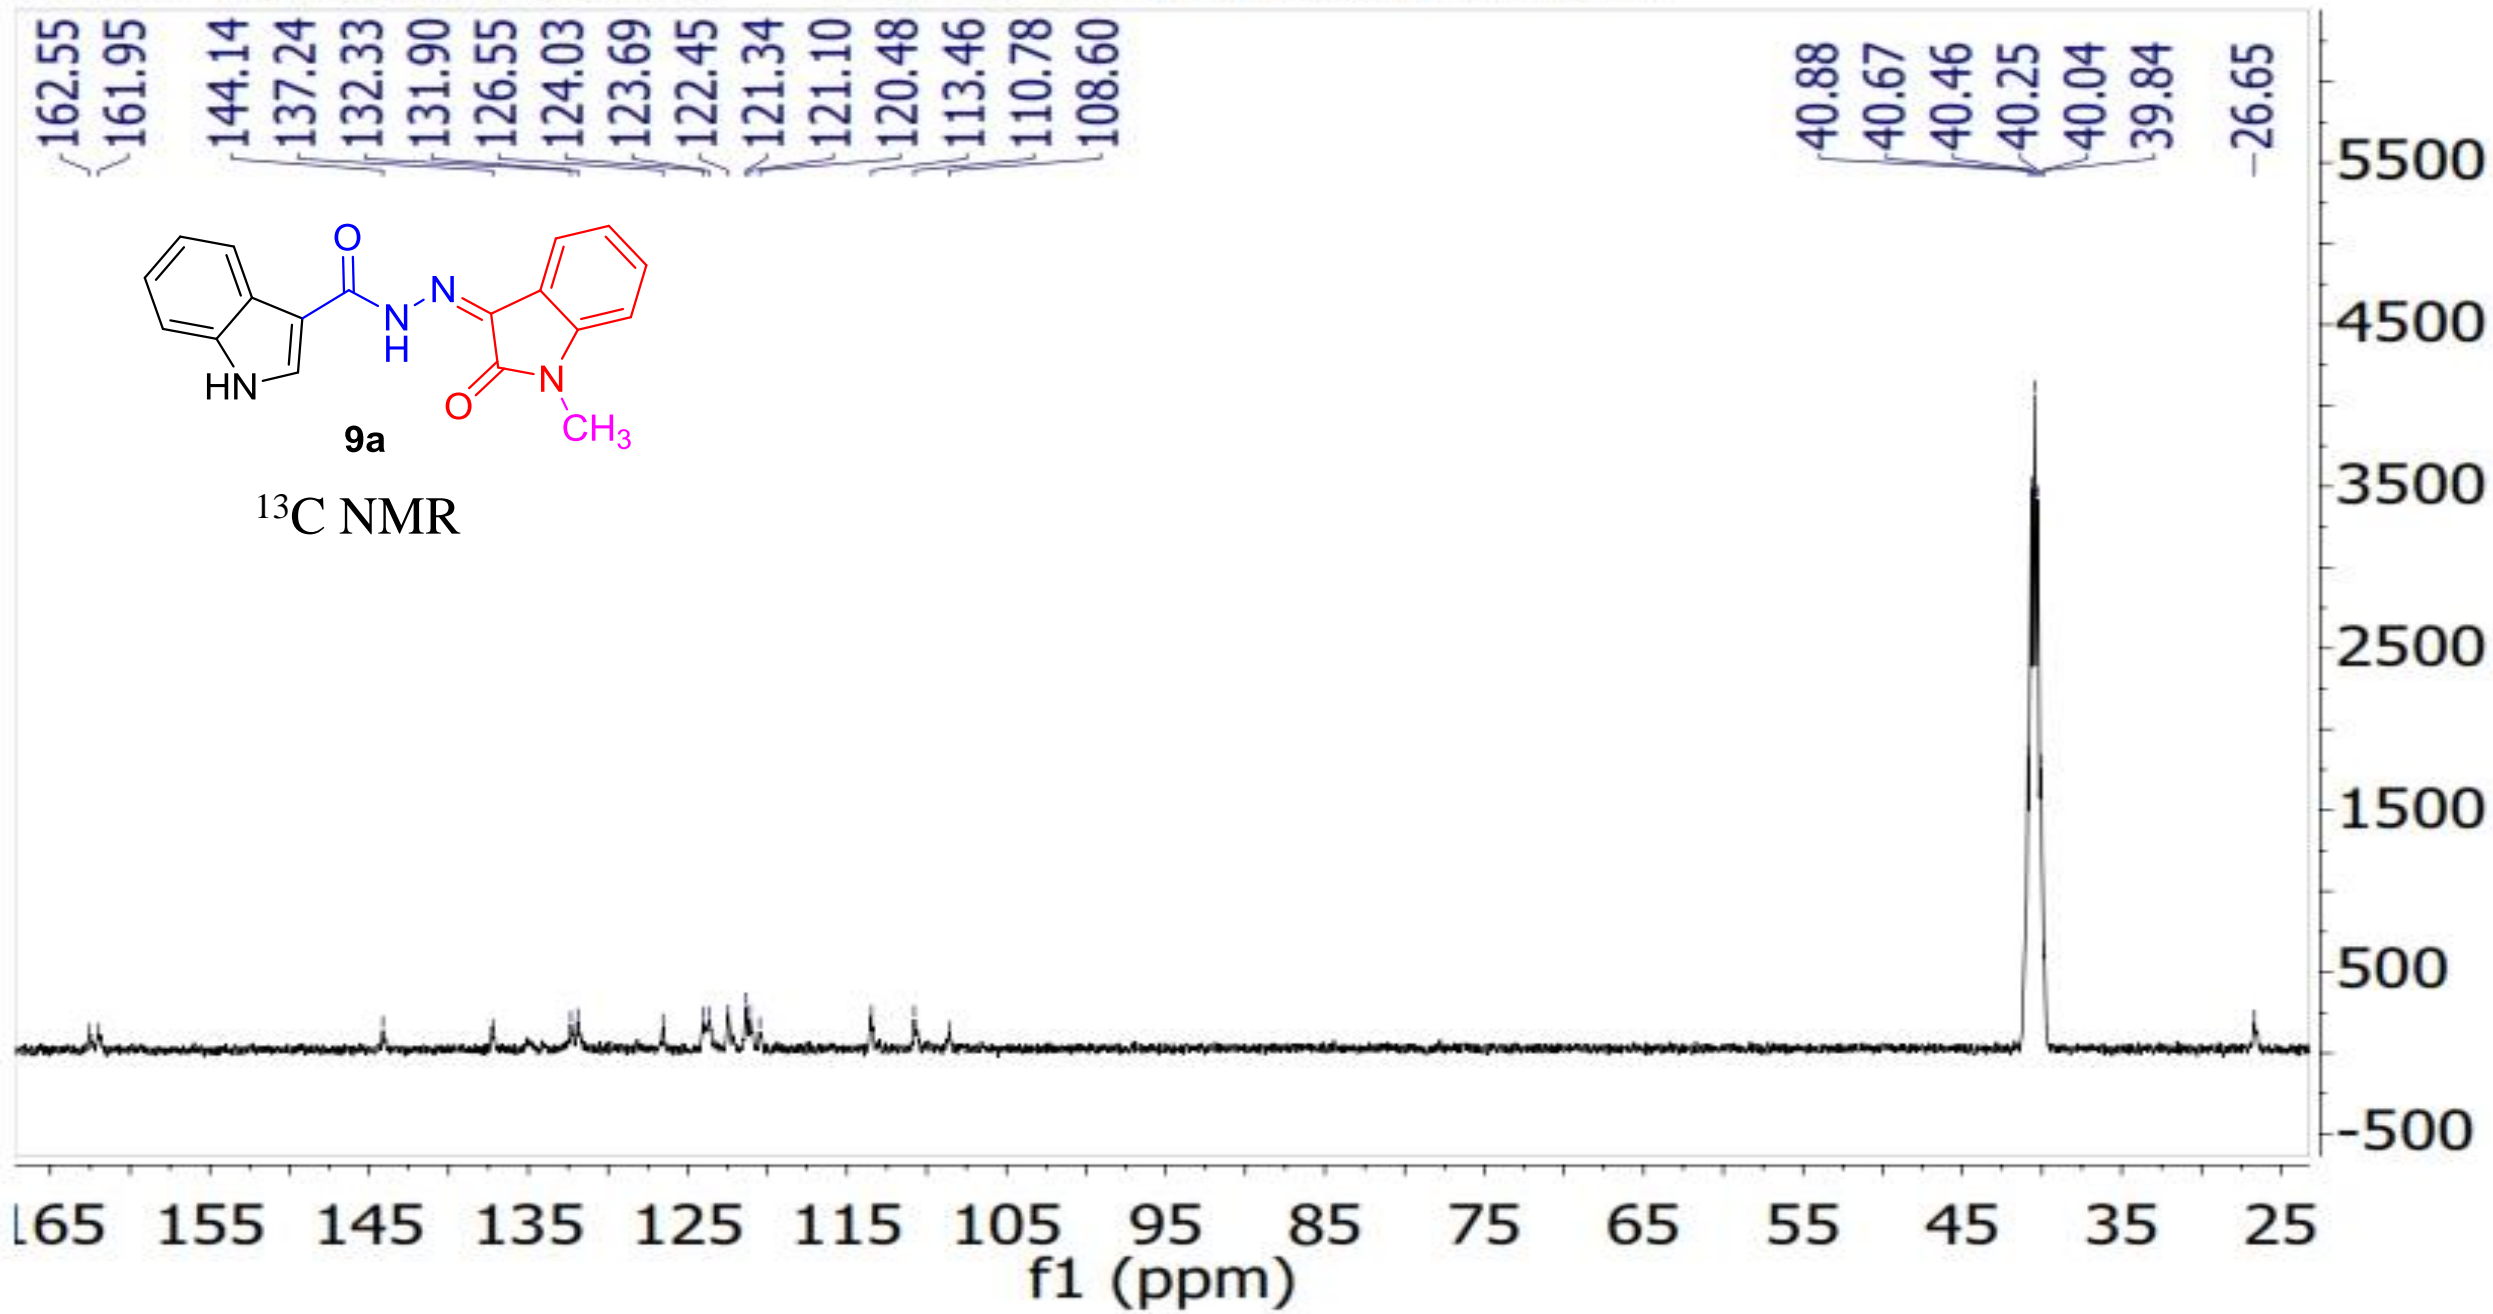

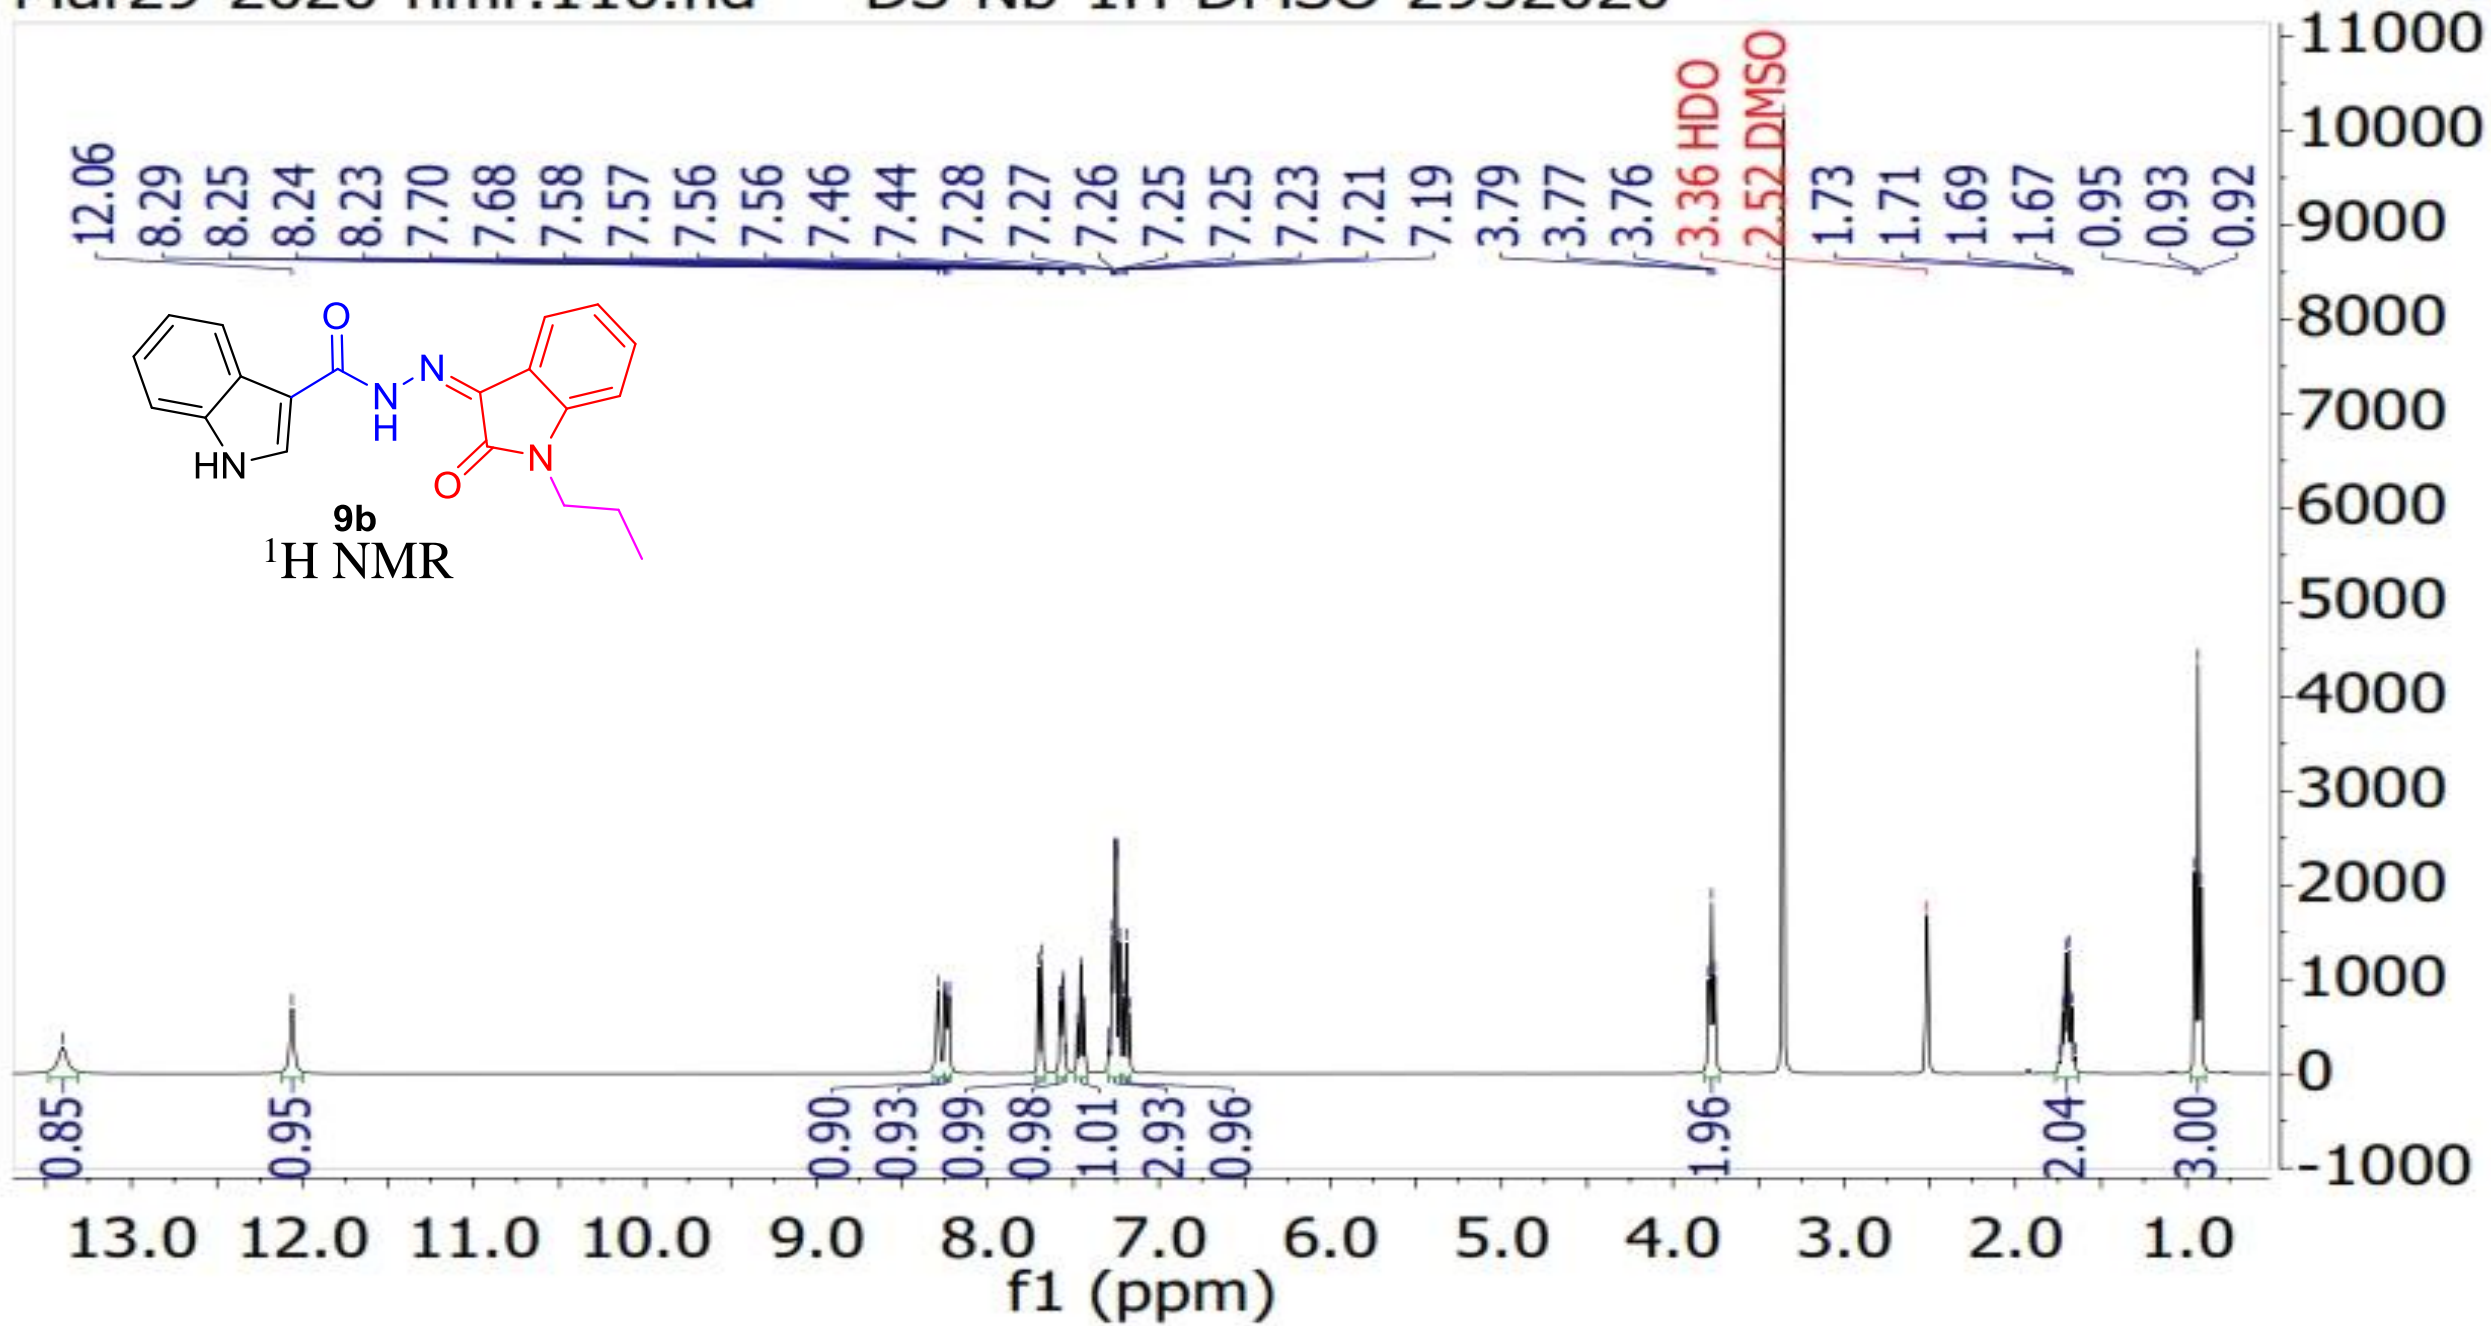

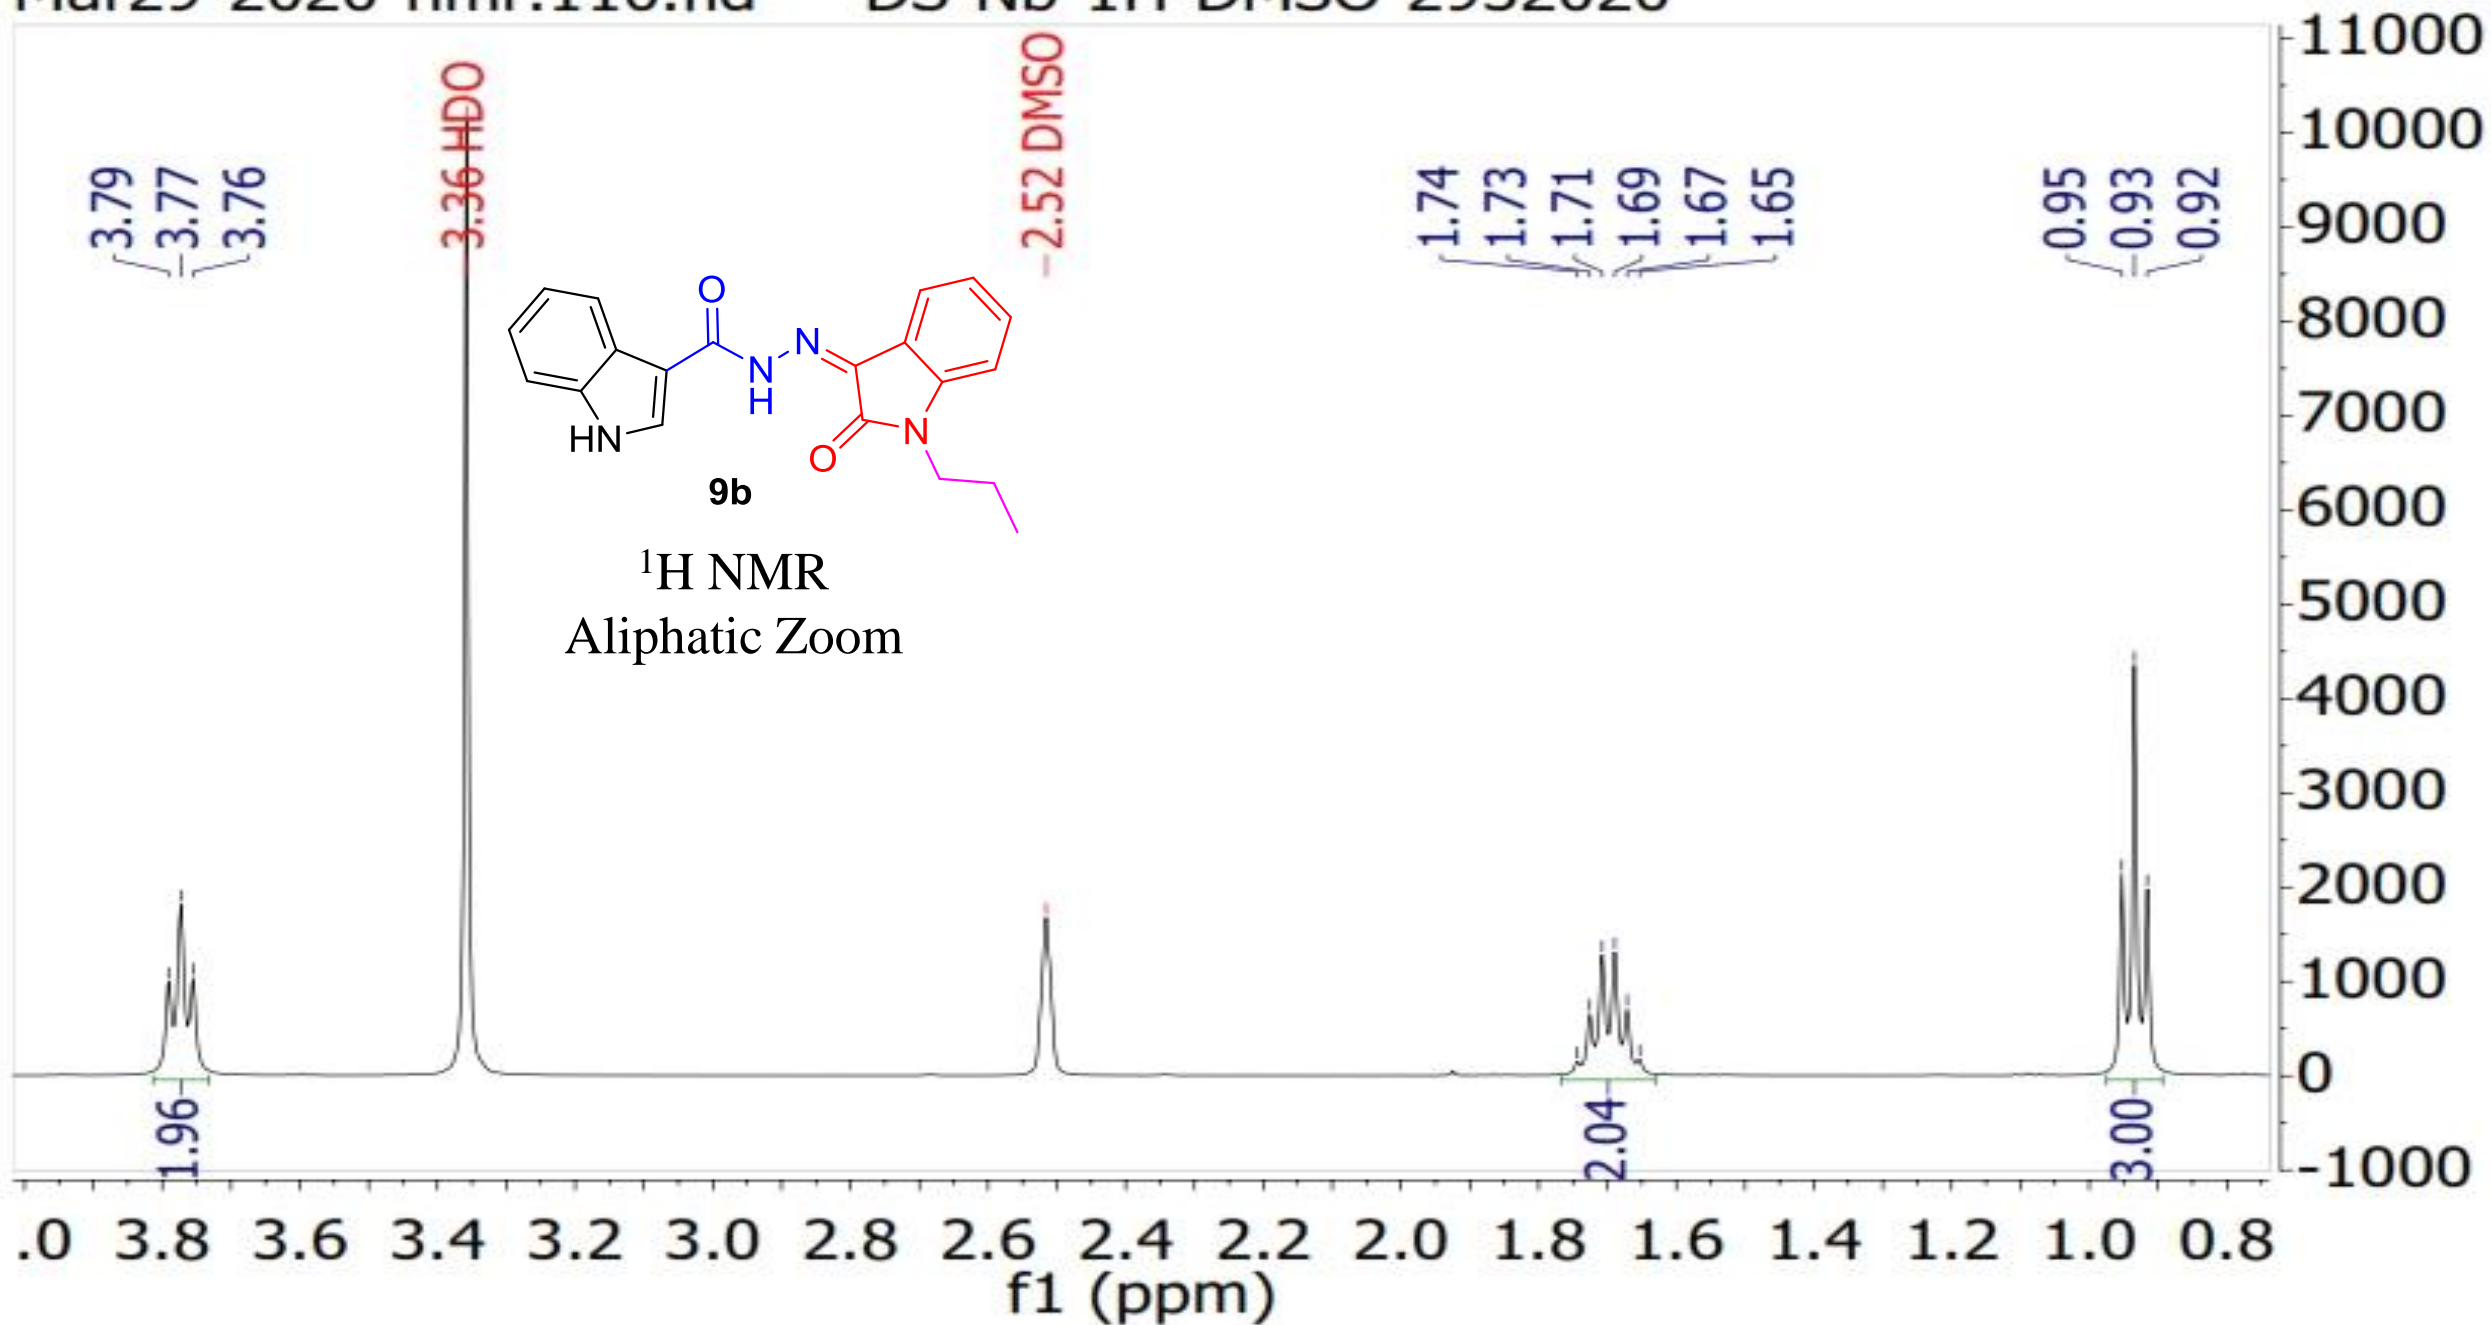

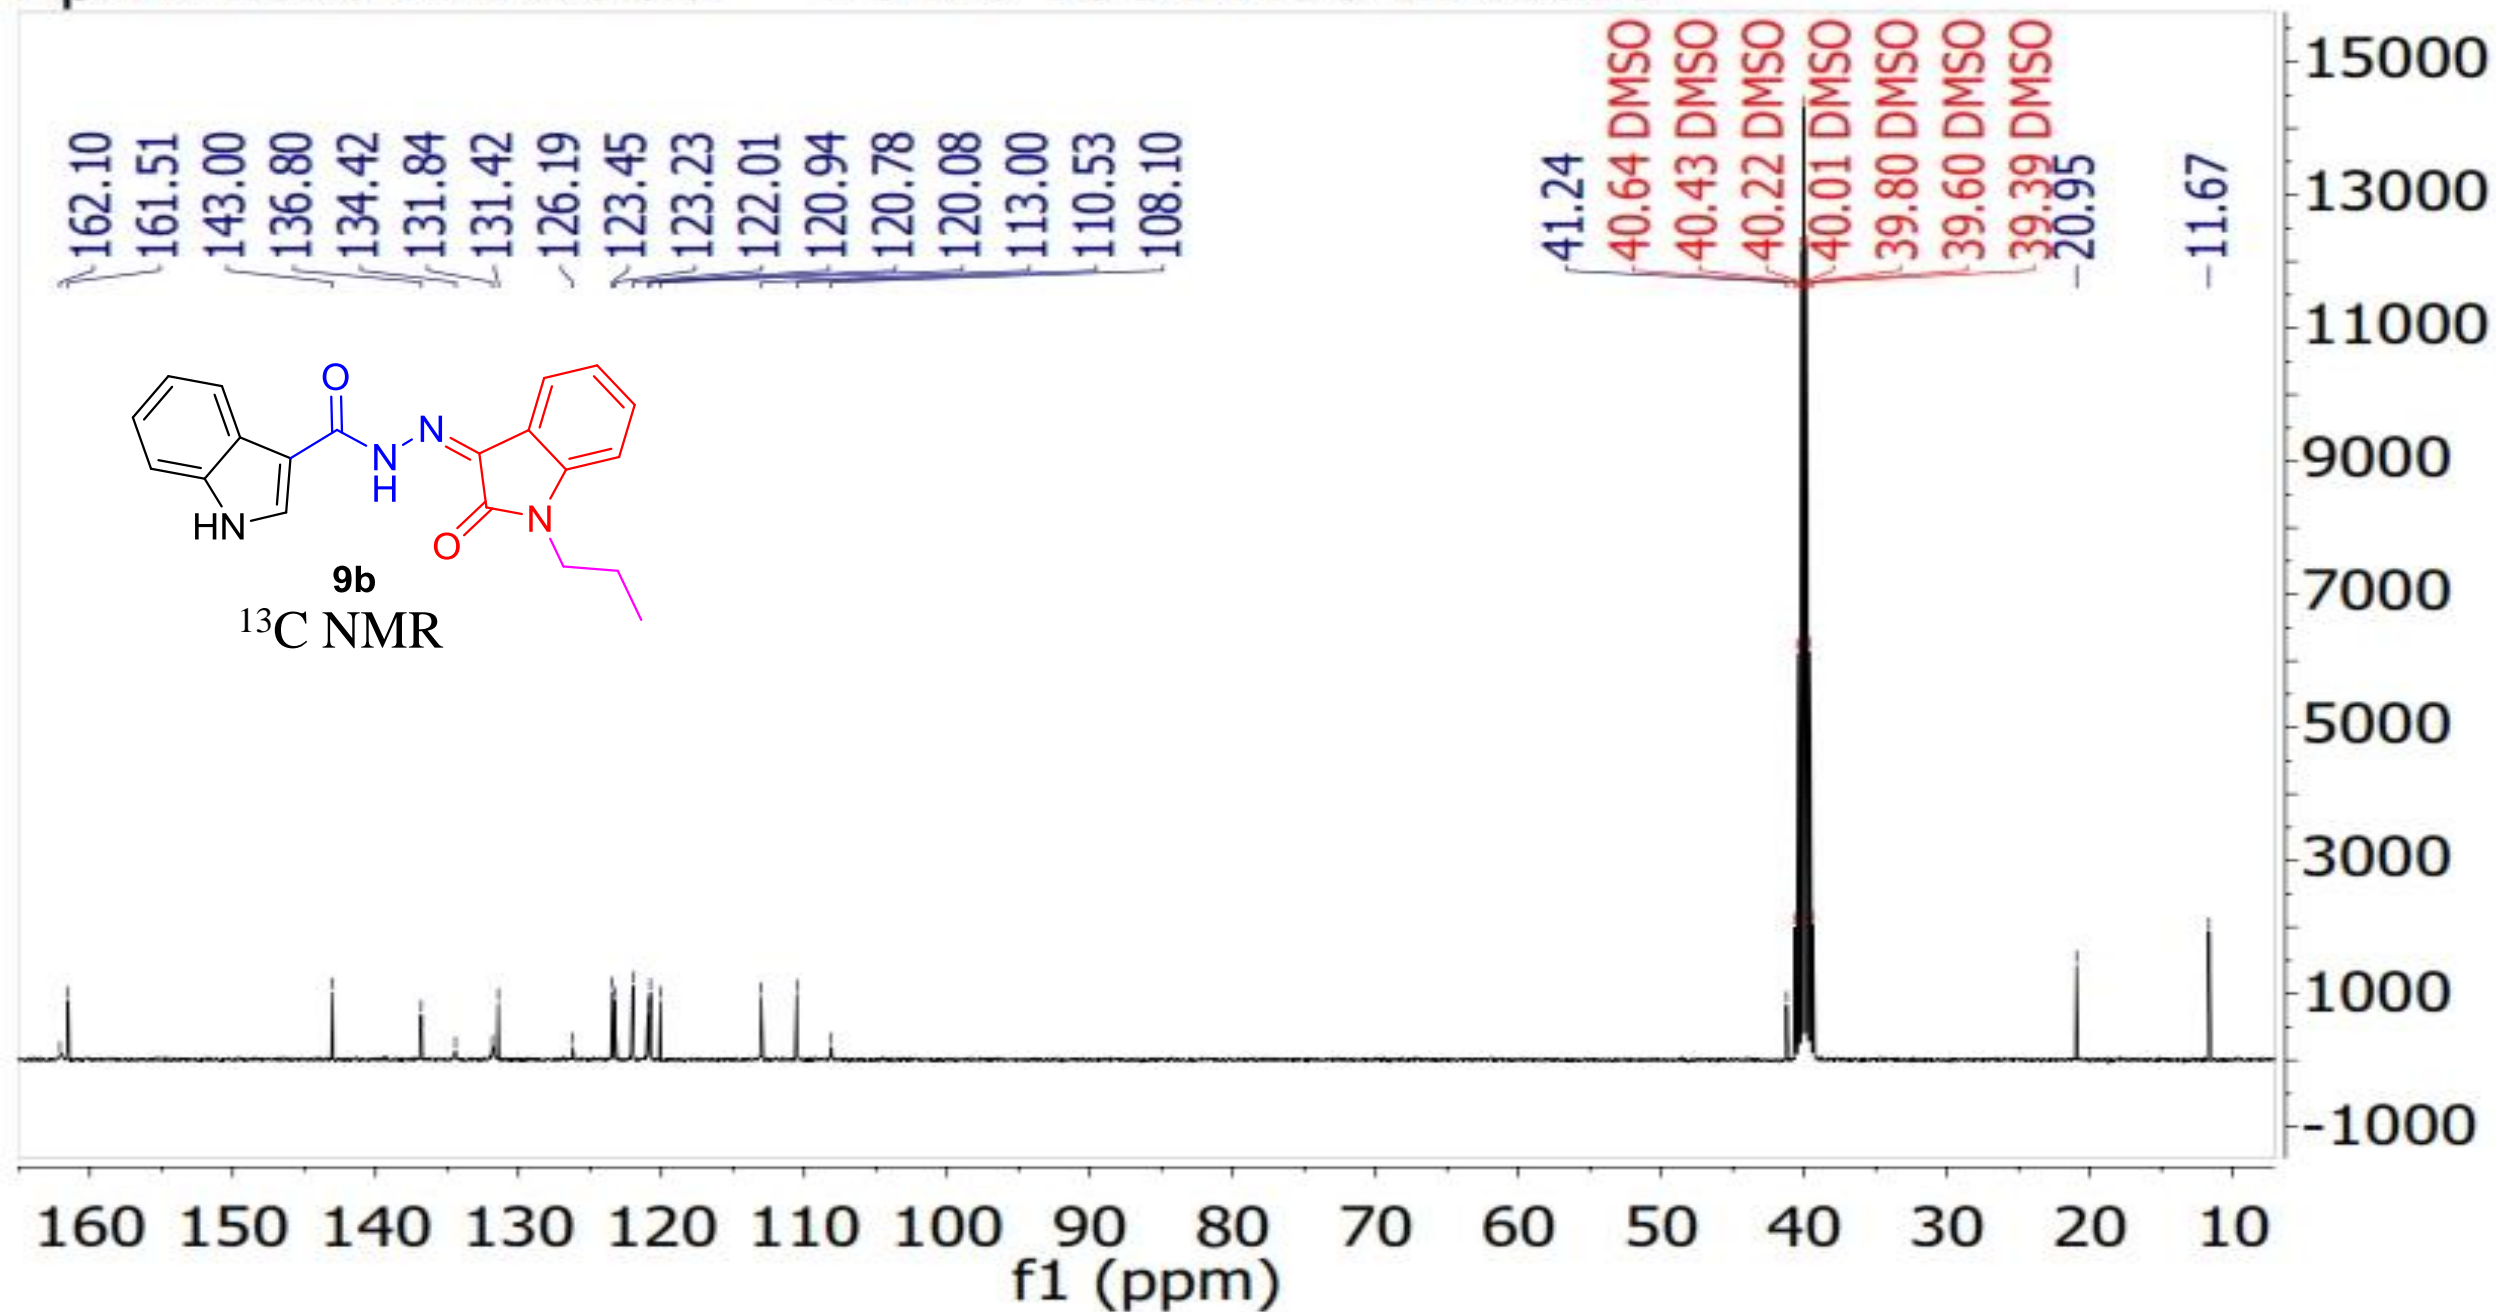



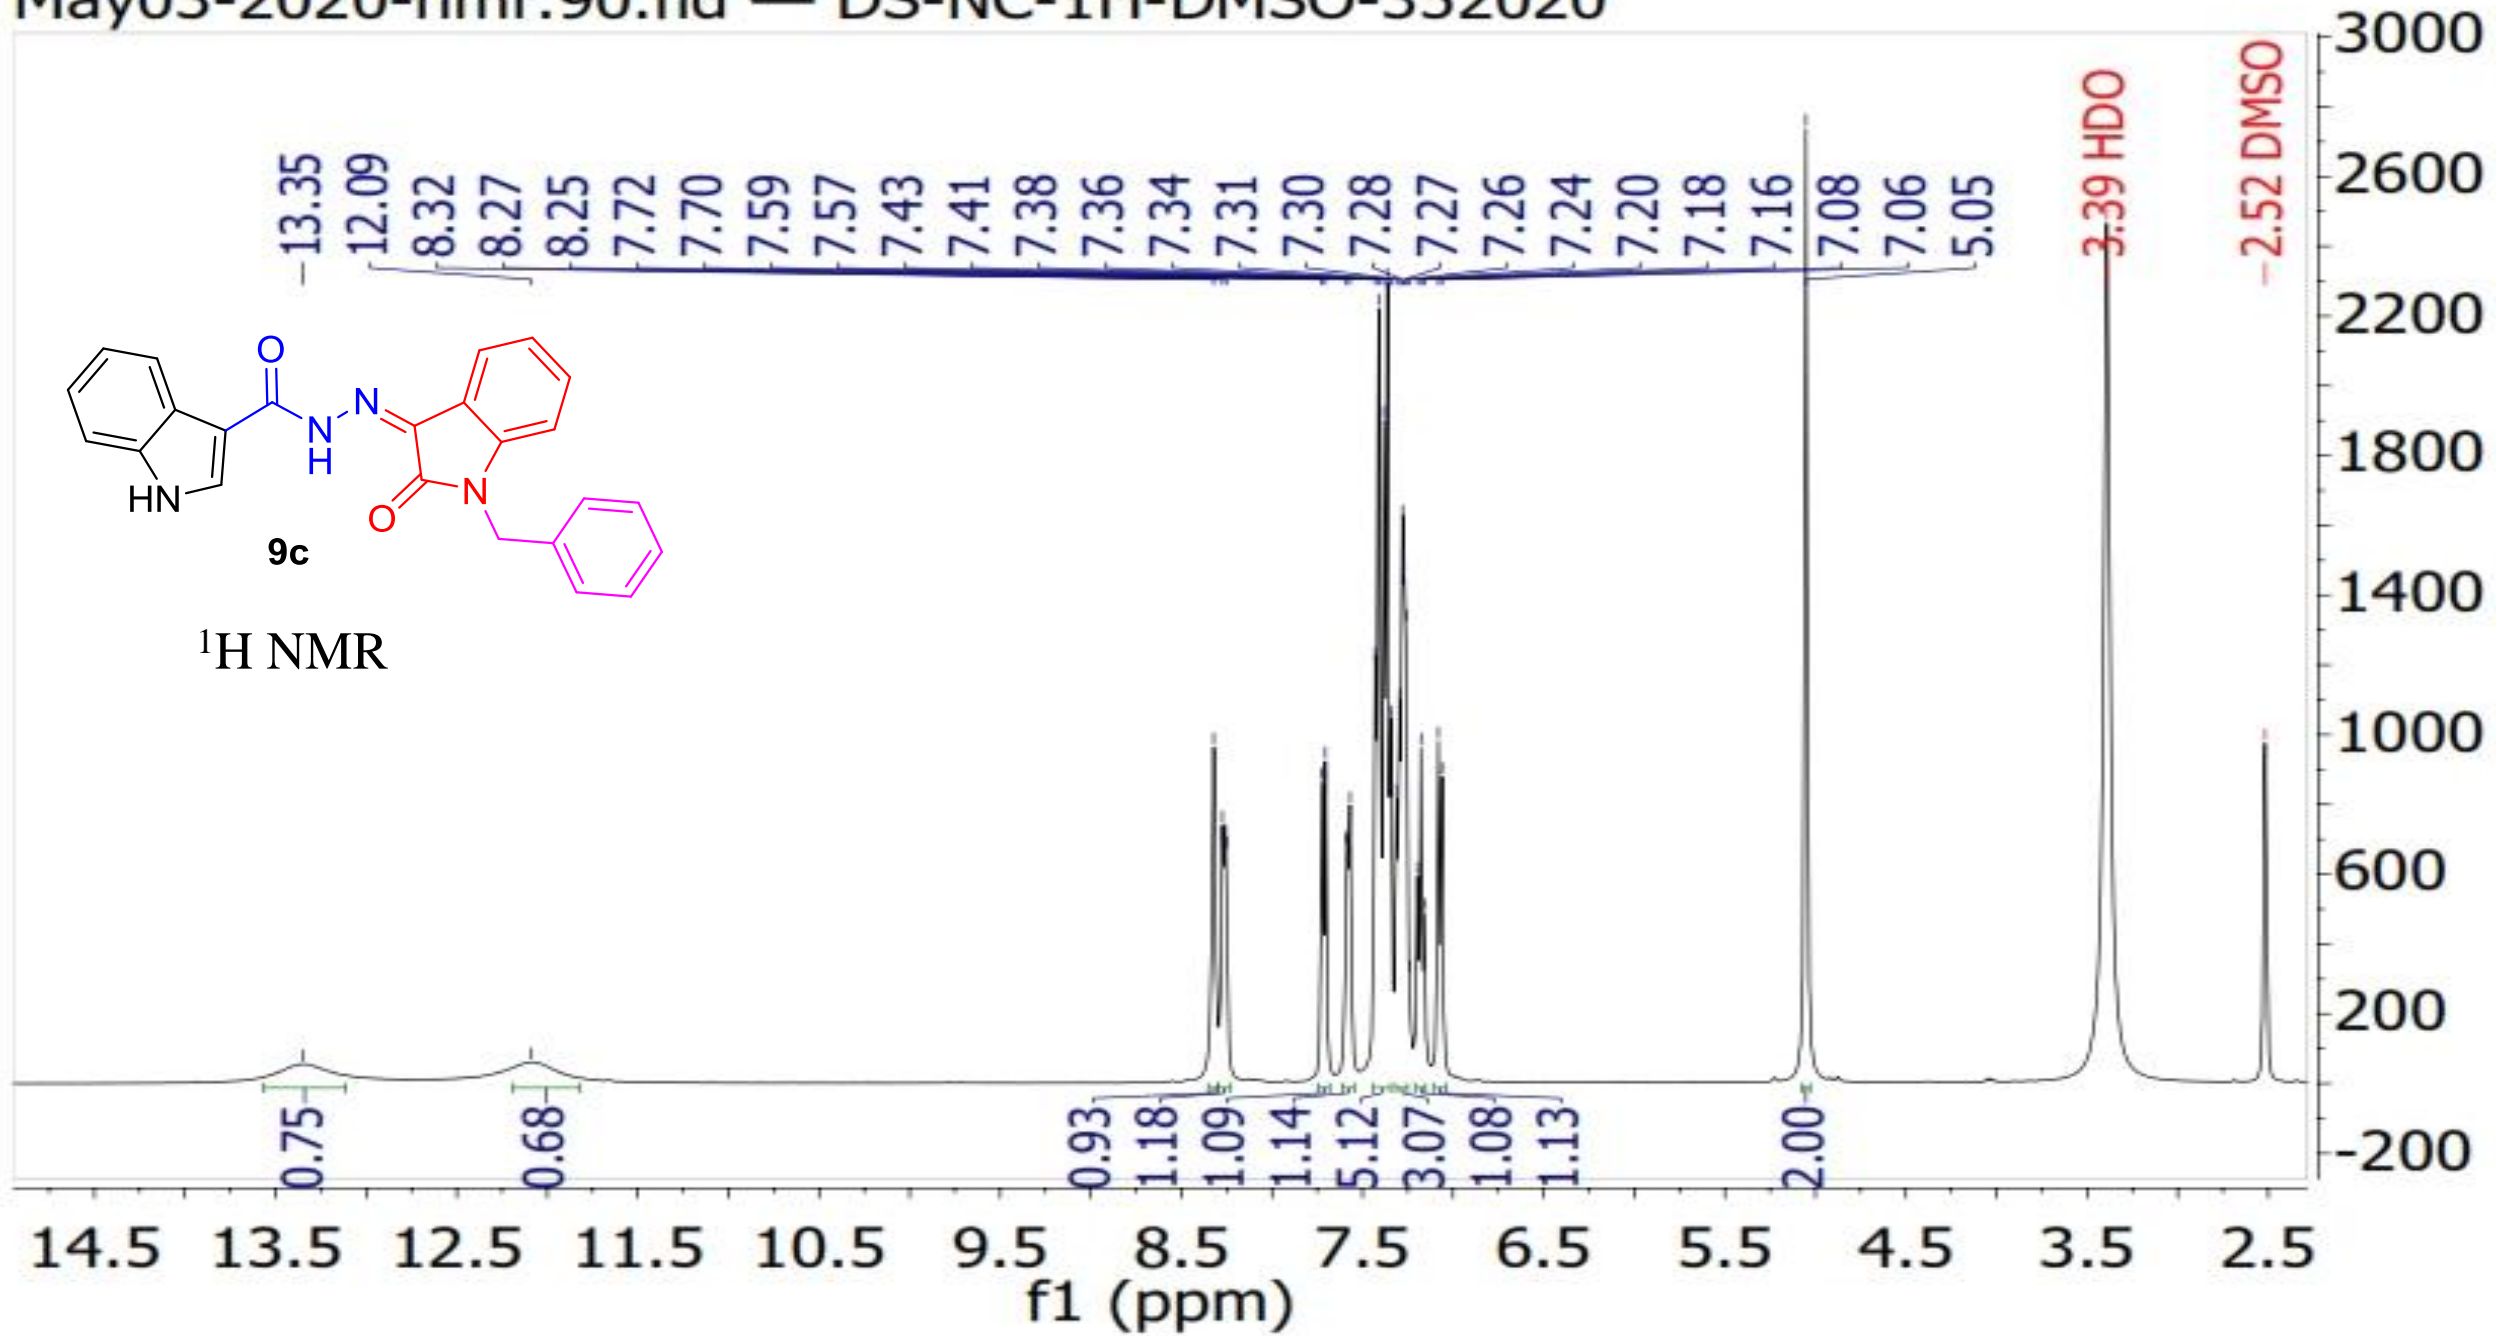

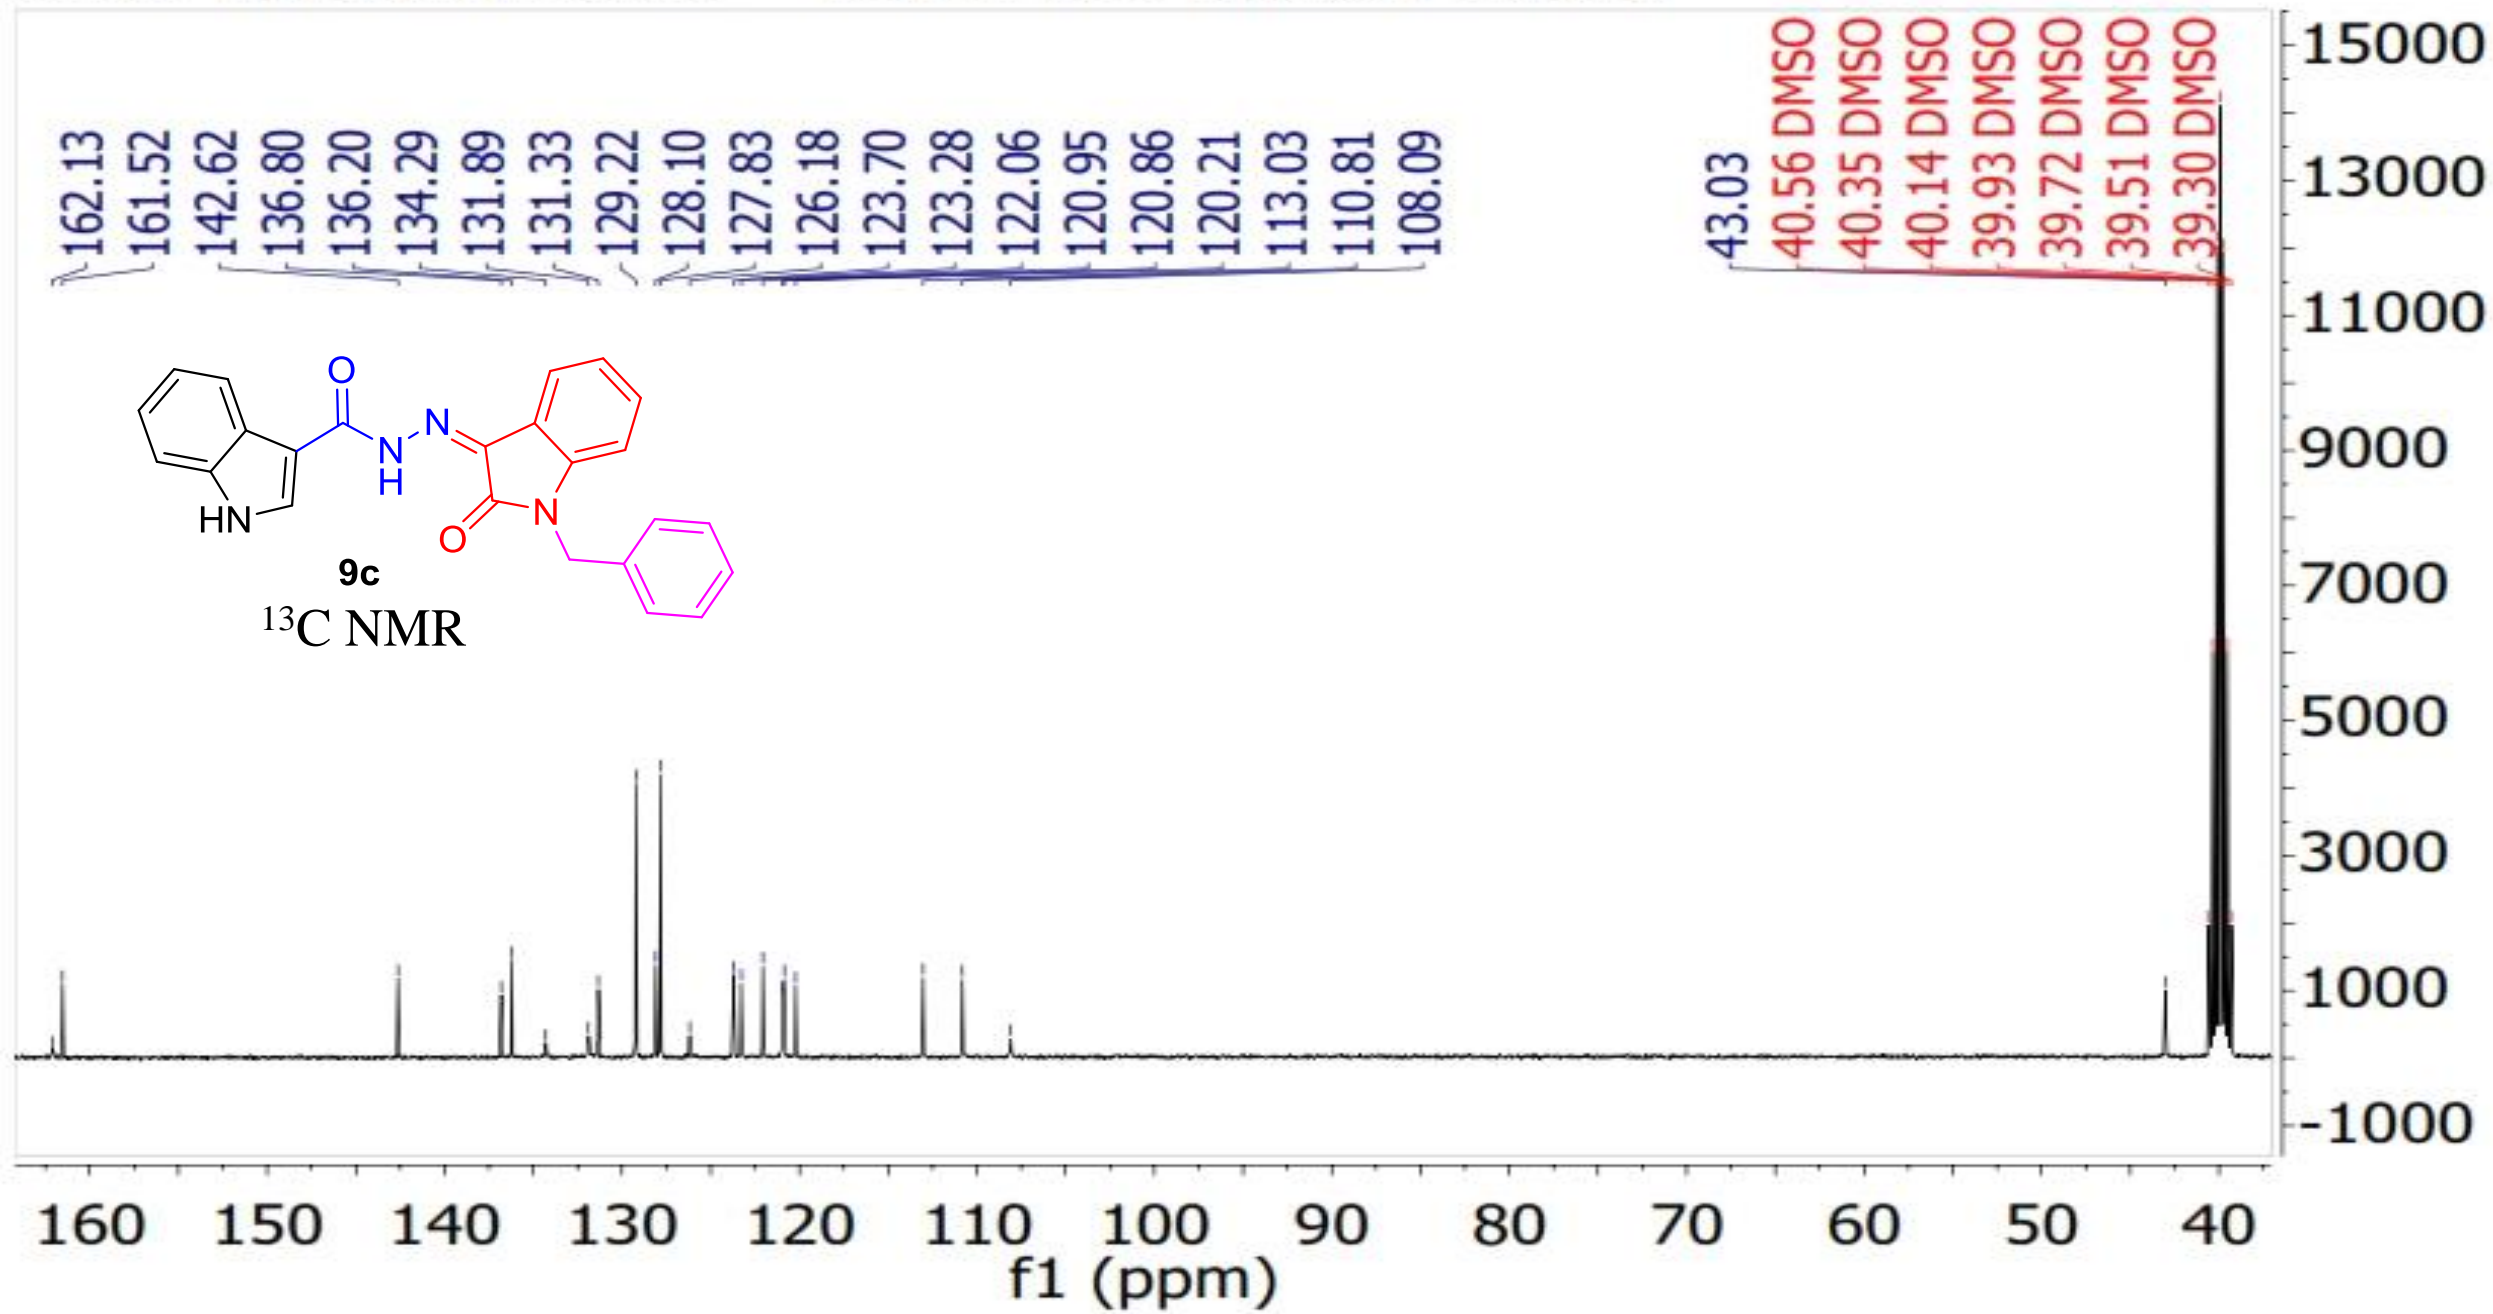

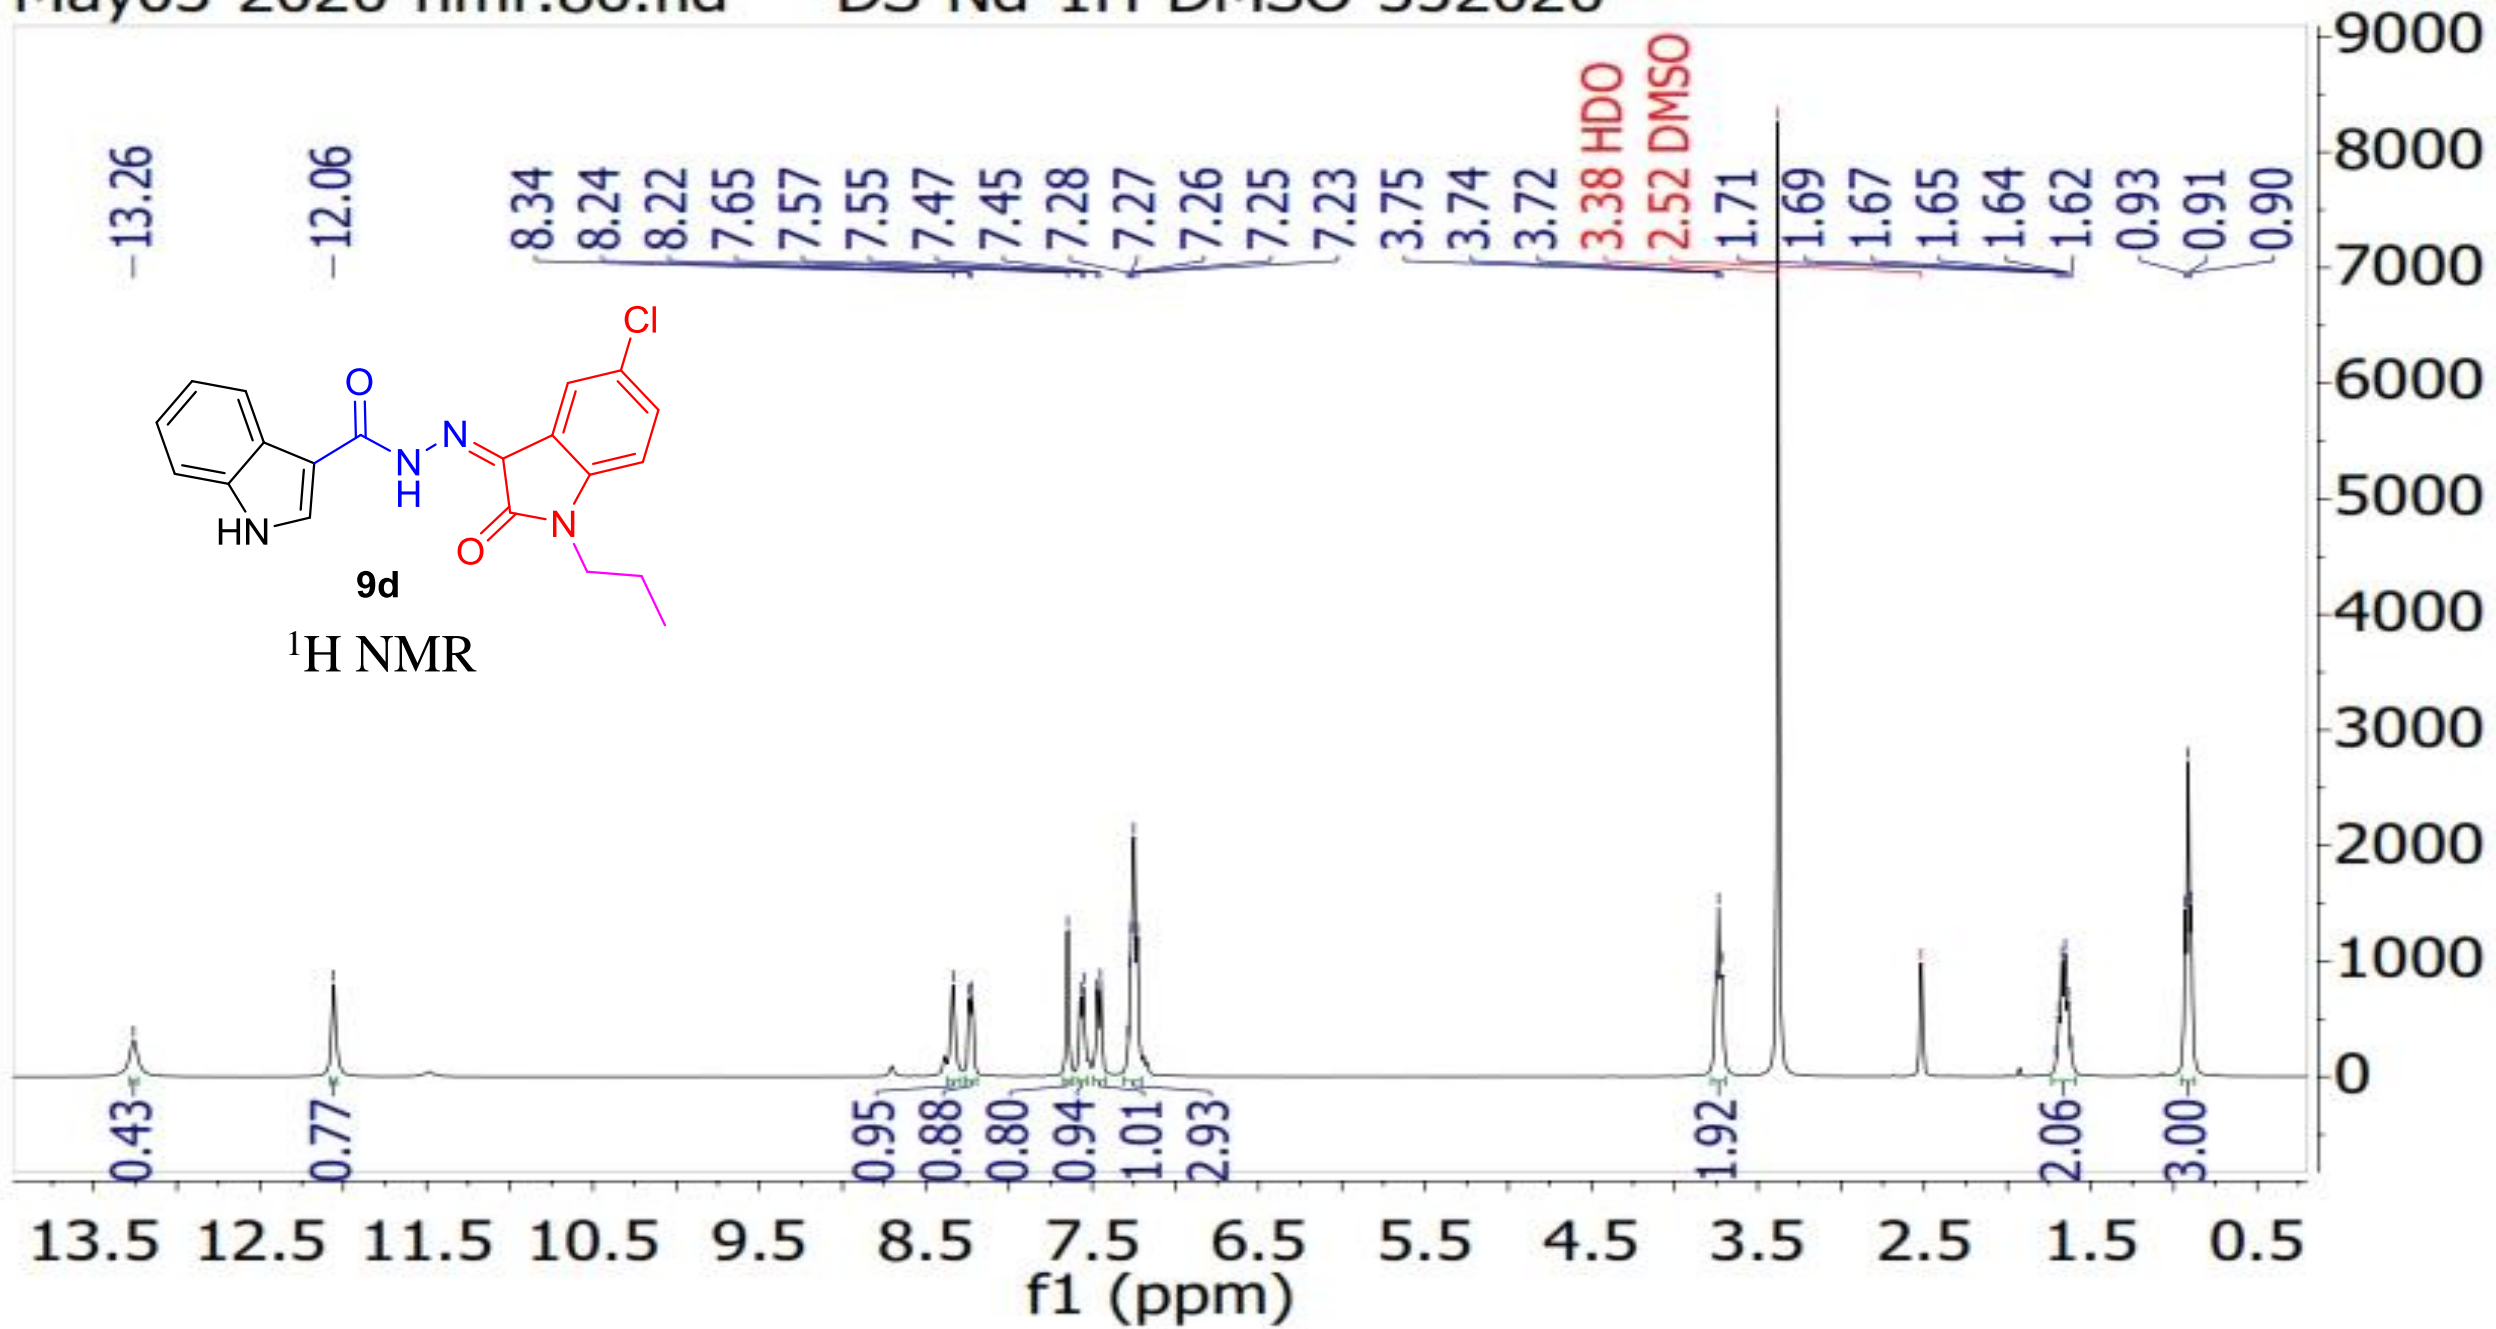

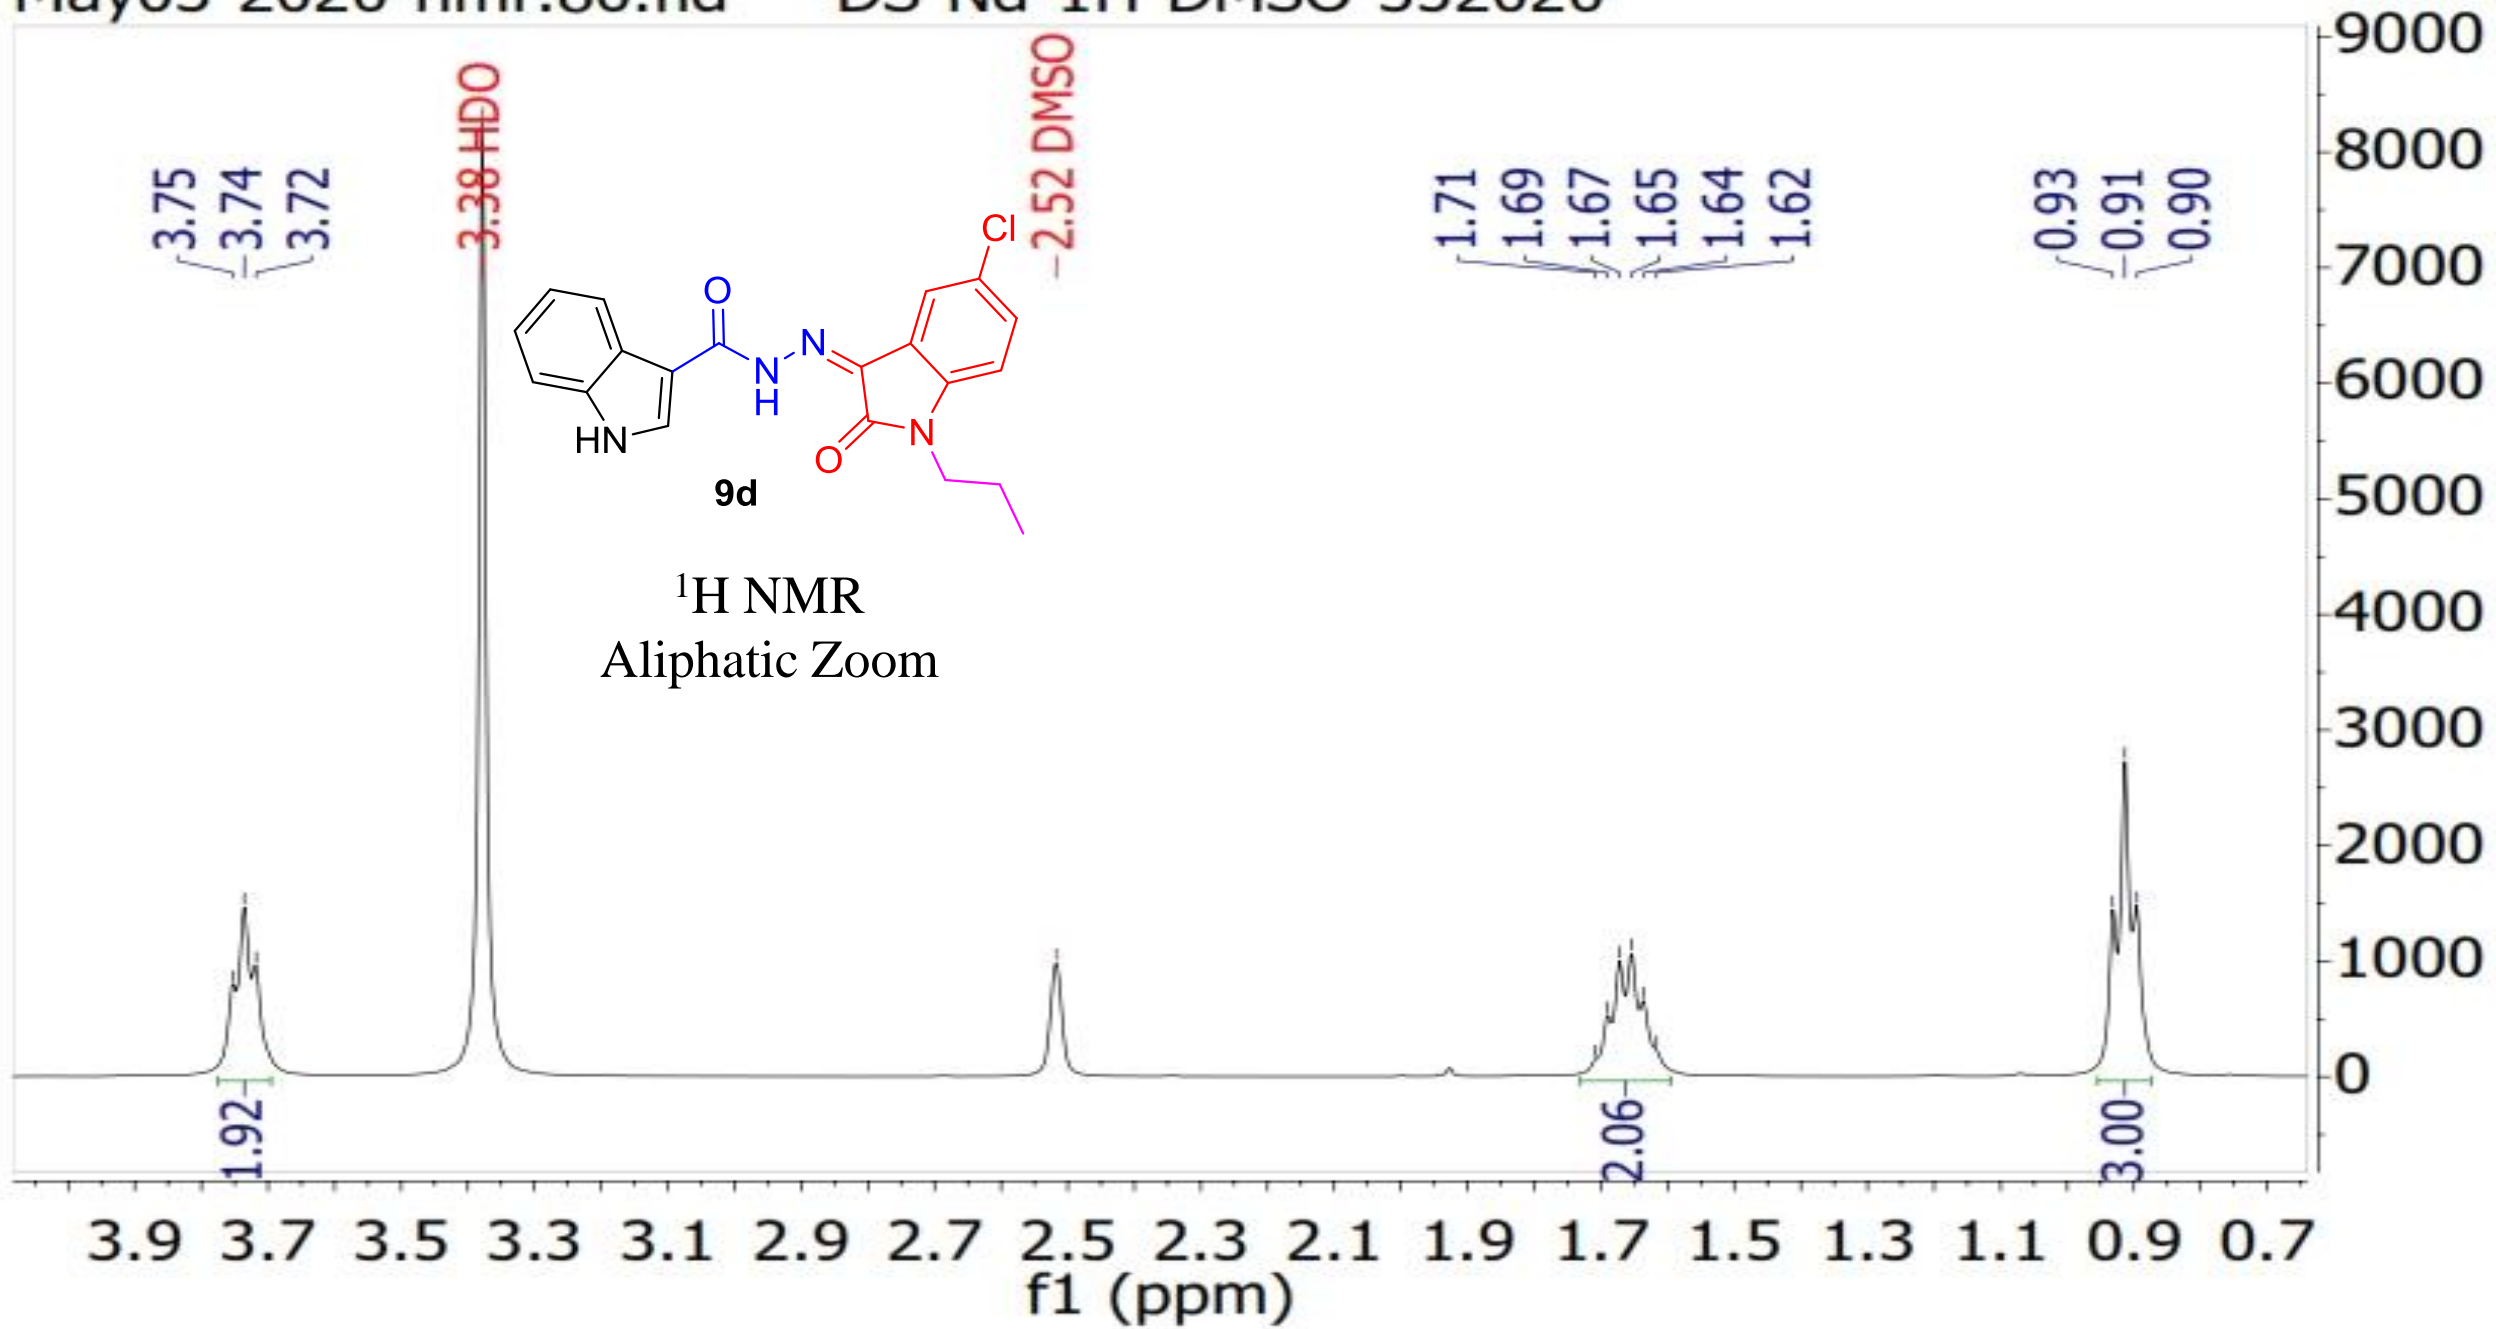

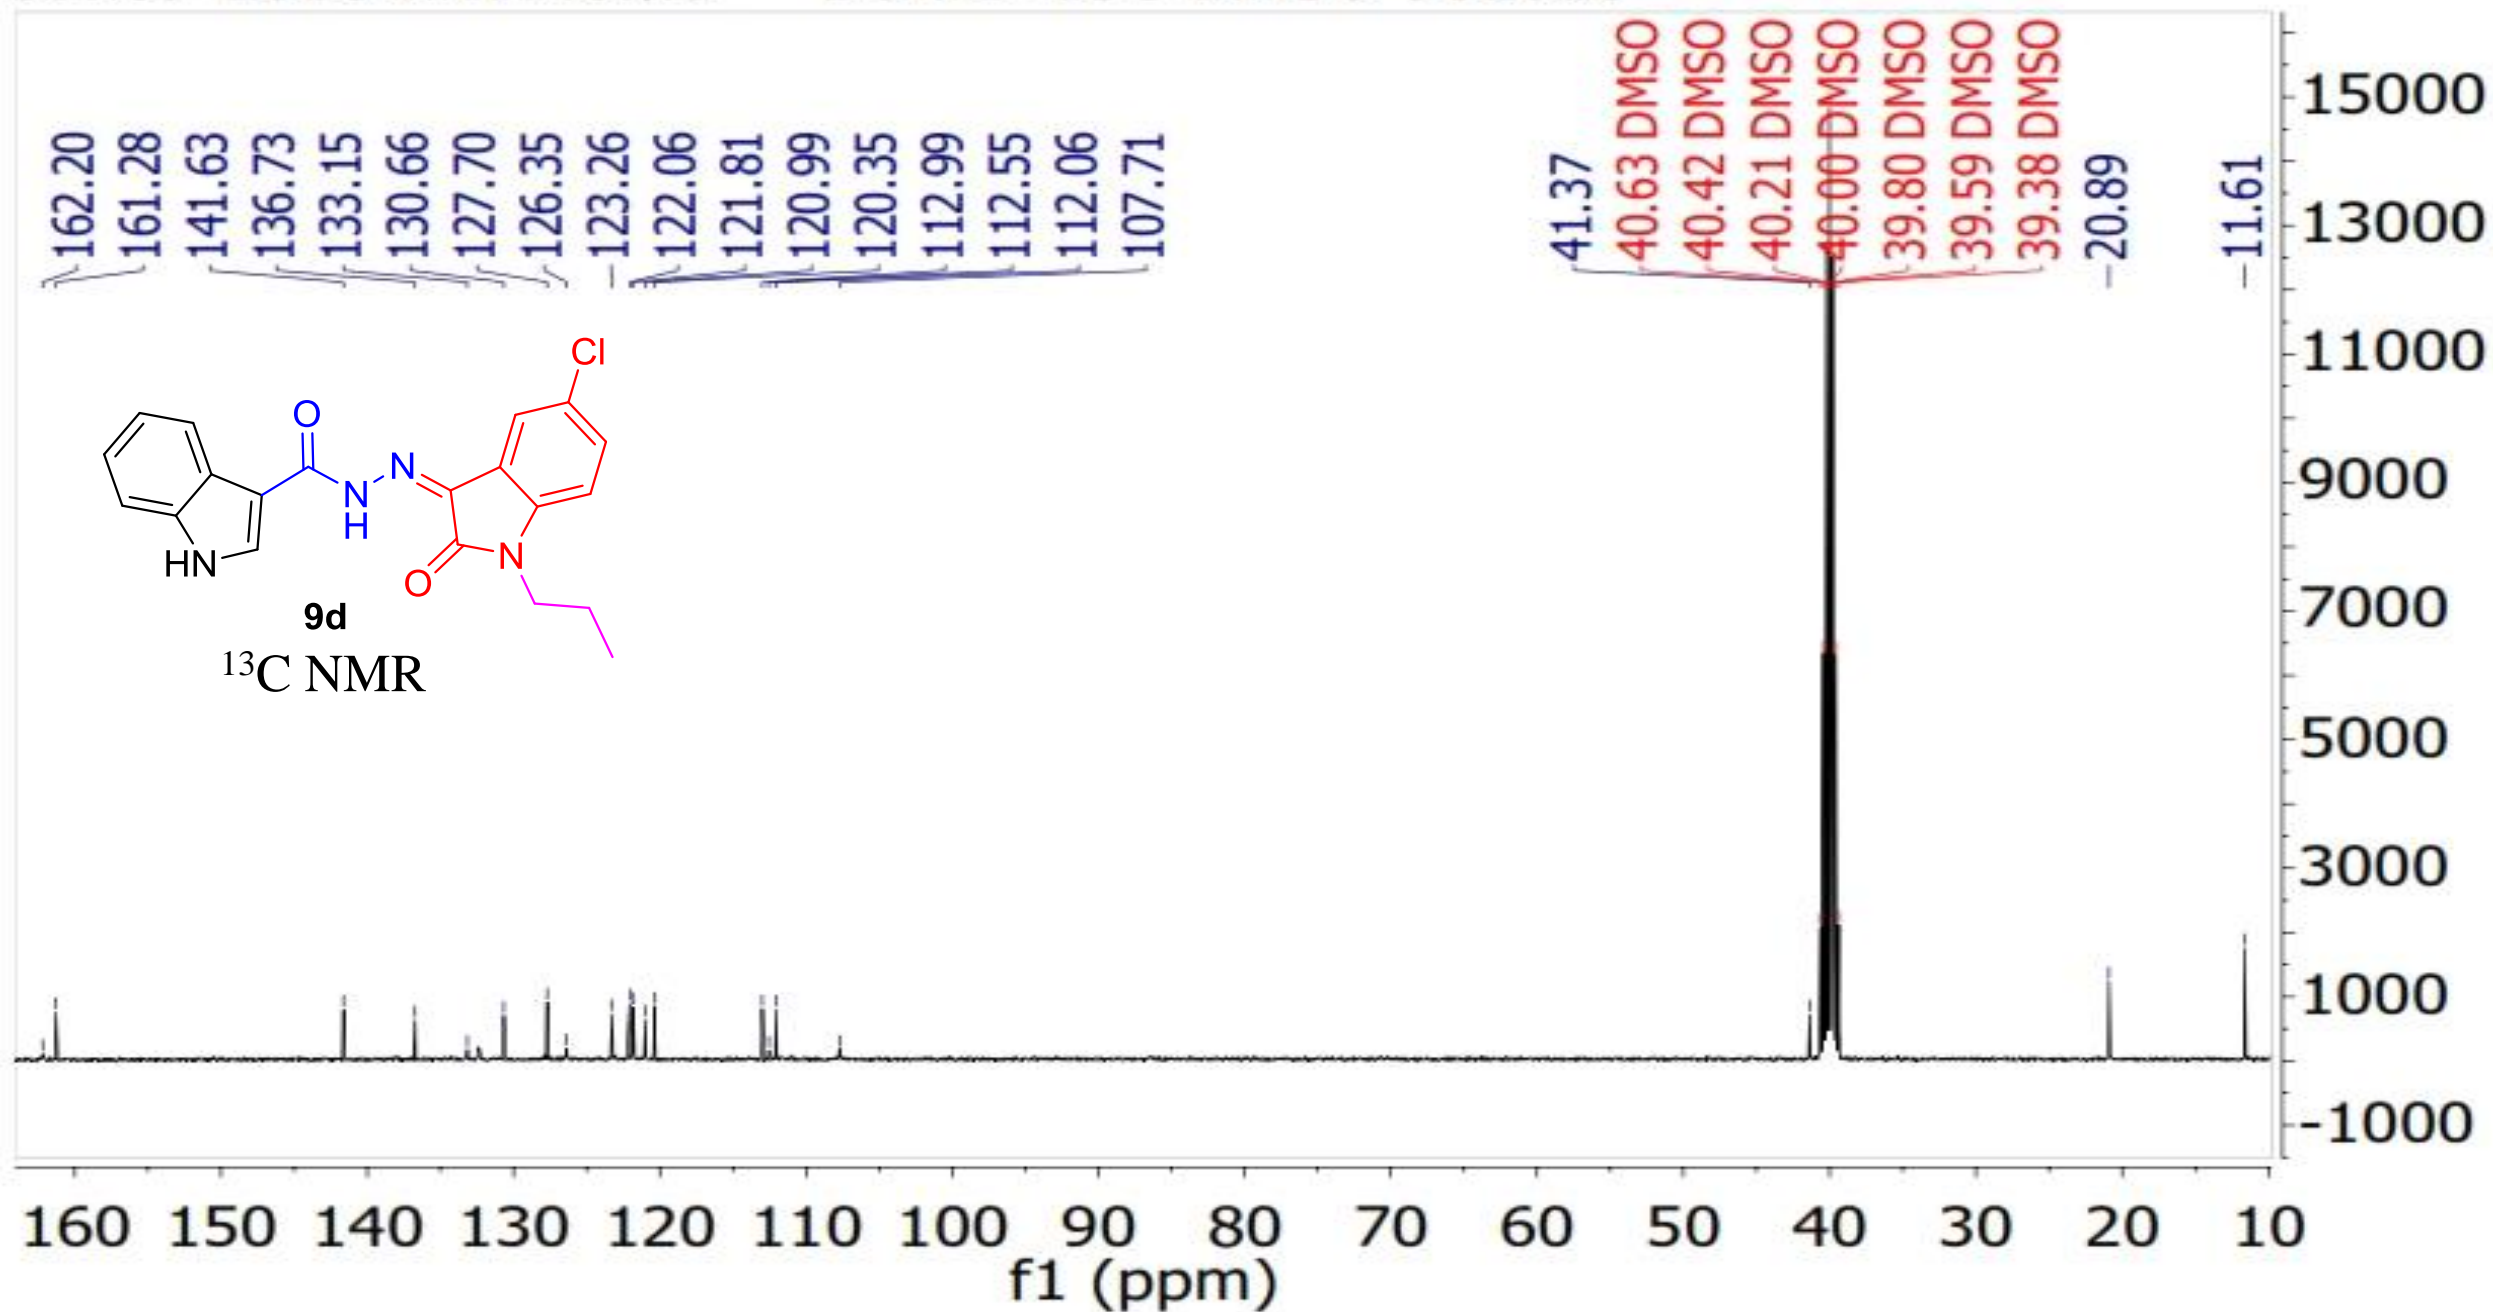

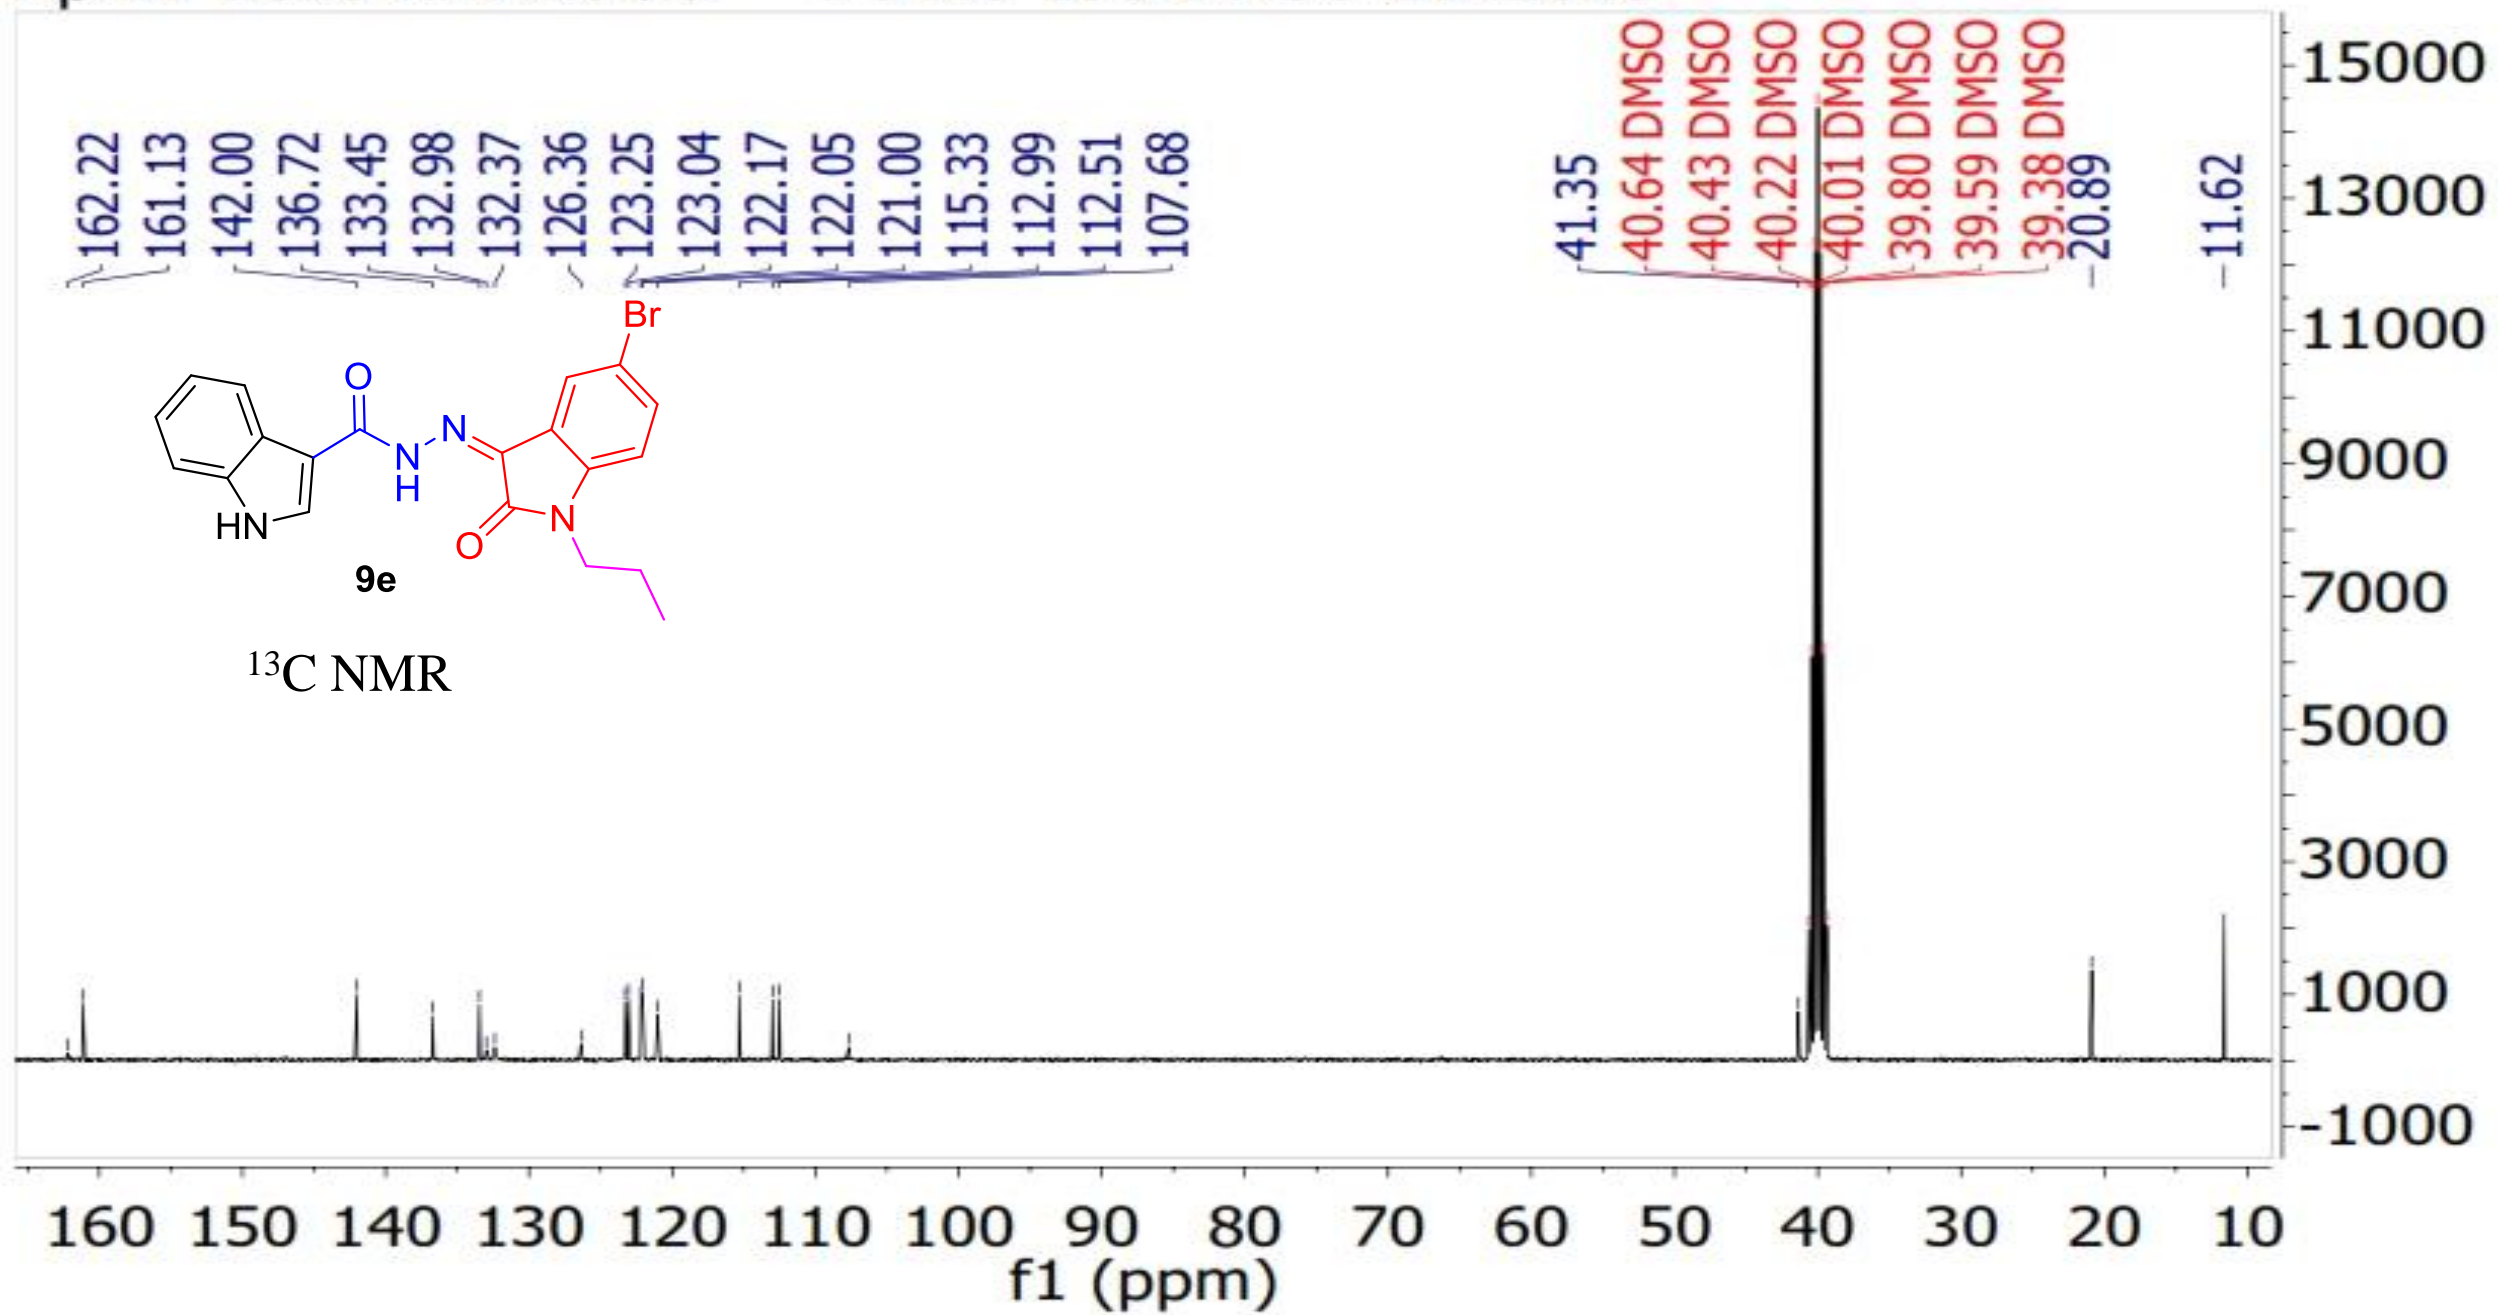

Supplement: IENZ_A_1862100_SM0360.pdf [file IENZ_A_1862100_SM0360.pdf]
